# Supplementary material
Source: publisher figshare collection journal article supplement (https://gsajournals.figshare.com/articles/dataset/_/10565996)
Supplement: Supplementary file 1 [file 1]

## Sheet: T1_Strain_Barcode
Sequences of Barcodes introduced into each strain. The culture collection number of the strains that were transformed (AWRI number (source)) and the Culture culture collection number of the transformed strain (AWRI number (new)) are provided together with a common name of the strain (Name). Each strain has two barcodes that together identify the strain. The sequence of each, as determined by sang…
AWRI number (source)	AWRI number (barcoded)	Common name	BC2	BC2 (revcomp)	Golay_ID	comment	BC1	BC1 (revcomp)	Golay_ID	comment
81	3365	81_Brelez	GAACCAAAGGAT	ATCCTTTGGTTC	GBC9		ACCACATACATC	GATGTATGTGGT	GBC101
170	3337	Sep_1	TTACTGTGCGAT	ATCGCACAGTAA	GBC6		ACCACATACATC	GATGTATGTGGT	GBC101
213	3109	Tintara_1953	ACACCTGGTGAT	ATCACCAGGTGT	GBC4		ACCACATACATC	GATGTATGTGGT	GBC101
228	3366	Stoneyfell_1949	GGAGACAAGGGA	TCCCTTGTCTCC	GBC1		GCTTCGGTAGAT	ATCTACCGAAGC	GBC105
266	3087	266	ACACCTGGTGAT	ATCACCAGGTGT	GBC4		AACACAAGGAGT	ACTCCTTGTGTT	GBC102
722	3085	722	AATCAGTCTCGT	ACGAGACTGATT	GBC2		ACCACATACATC	GATGTATGTGGT	GBC101
724	3080	Bright_Tokay6	GGAGACAAGGGA	TCCCTTGTCTCC	GBC1		ACCACATACATC	GATGTATGTGGT	GBC101
735	3062	Beech_Wadenswil	TTACTGTGCGAT	ATCGCACAGTAA	GBC6		AACACAAGGAGT	ACTCCTTGTGTT	GBC102
739	3081	Beech_667	GGAGACAAGAGA	TCTCTTGTCTCC	GBC1	base change in barcode	AACACAAGGAGT	ACTCCTTGTGTT	GBC102
740	3018	Trier_25	CTAACCTCCGCT	AGCGGAGGTTAG	GBC8		ACCACATACATC	GATGTATGTGGT	GBC101
763	3089	763	TTACTGTGCGAT	ATCGCACAGTAA	GBC6		AATGTCCGTGAC	GTCACGGACATT	GBC103
767	3378	WE_14	CCAGTGTATGCA	TGCATACACTGG	GBC13		ACCACATACATC	GATGTATGTGGT	GBC101
778	3063	778	ACACCTGGTGAT	ATCACCAGGTGT	GBC4		AATGTCCGTGAC	GTCACGGACATT	GBC103
793	3379	793	-GGCTACACGAC	GTCGTGTAGCC-	GBC7	deletion in barcode	ACCACATACATC	GATGTATGTGGT	GBC101
796	3019	796	GAACCAAAGGAT	ATCCTTTGGTTC	GBC9		AACACAAGGAGT	ACTCCTTGTGTT	GBC102
833	3020	Penfolds_B	ACACCTGGTGAT	ATCACCAGGTGT	GBC4		TACTTCGCTCGC	GCGAGCGAAGTA	GBC104
838	3021	838	GAACCAAAGGAT	ATCCTTTGGTTC	GBC9		AATGTCCGTGAC	GTCACGGACATT	GBC103
896	3022	896	CTAACCTCCGCT	AGCGGAGGTTAG	GBC8		AACACAAGGAGT	ACTCCTTGTGTT	GBC102
934	3082	UCD_48-41	GGAGACAAGGGA	TCCCTTGTCTCC	GBC1		AATGTCCGTGAC	GTCACGGACATT	GBC103
935	3371	UCD_C-9	CCAGTGTATGCA	TGCATACACTGG	GBC13		AATGTCCGTGAC	GTCACGGACATT	GBC103
947	3023	Beech_729	CTAACCTCCGCT	AGCGGAGGTTAG	GBC8		AATGTCCGTGAC	GTCACGGACATT	GBC103
1001	3024	Petaluma_1	TTACTGTGCGAT	ATCGCACAGTAA	GBC6		TACTTCGCTCGC	GCGAGCGAAGTA	GBC104
1017	3025	Petaluma_2	GAACCAAAGGAT	ATCCTTTGGTTC	GBC9		TACTTCGCTCGC	GCGAGCGAAGTA	GBC104
1077	3380	UCD_513	CCAGTGTATGCA	TGCATACACTGG	GBC13		TACTTCGCTCGC	GCGAGCGAAGTA	GBC104
1082	3026	NCYC_761	AATCCGTACAGC	GCTGTACGGATT	GBC3		ACCACATACATC	GATGTATGTGGT	GBC101
1427	3372	Lalvin_WSK 27	CCAGTGTATGCA	TGCATACACTGG	GBC13		GCTTCGGTAGAT	ATCTACCGAAGC	GBC105
1429	3027	Lalvin_DV10	ACACCTGGTGAT	ATCACCAGGTGT	GBC4		GCTTCGGTAGAT	ATCTACCGAAGC	GBC105
1430	3367	Enoferm_Assmunshansen	GTATGCGCT-TA	TA-AGCGCATAC	GBC10	deletion in barcode	ACAAGGAGGTGA	TCACCTCCTTGT	GBC108
1432	3066	Vin_7	GAACCAAAGGAT	ATCCTTTGGTTC	GBC9		GCTTCGGTAGAT	ATCTACCGAAGC	GBC105
1436	3336	Lalvin_S6U	TATCGTTGACCA	TGGTCAACGATA	GBC5		ACCACATACATC	GATGTATGTGGT	GBC101
1482	3071	C_Todd_1	TCCGACACAATT	AATTGTGTCGGA	GBC12		ACCACATACATC	GATGTATGTGGT	GBC101
1483	3028	Lalvin_ICV_D254	CTAACCTCCGCT	AGCGGAGGTTAG	GBC8		TACTTCGCTCGC	GCGAGCGAAGTA	GBC104
1485	3072	Lalvin_RC212	TCCGACACAATT	AATTGTGTCGGA	GBC12		AACACAAGGAGT	ACTCCTTGTGTT	GBC102
1486	3067	Lalvin_BM45	GAACCAAAGGAT	ATCCTTTGGTTC	GBC9		CTTACACCAAGT	ACTTGGTGTAAG	GBC106
1487	3029	Lalvin_Rhone_L2056	CTAACCTCCGCT	AGCGGAGGTTAG	GBC8		GCTTCGGTAGAT	ATCTACCGAAGC	GBC105
1488	3030	Lalvin_ICV_D47	GAACCAAAGGAT	ATCCTTTGGTTC	GBC9		TGACCTCCAAGA	TCTTGGAGGTCA	GBC107
1490	3088	Lalvin_Rhone_L2323	TATCGTTGACCA	TGGTCAACGATA	GBC5		ACAAGGAGGTGA	TCACCTCCTTGT	GBC108
1491	3073	Uvaferm_BDX	TCCGACACAATT	AATTGTGTCGGA	GBC12		AATGTCCGTGAC	GTCACGGACATT	GBC103
1493	3090	Lalvin_71B	CTAACCTCCGCT	AGCGGAGGTTAG	GBC8		CTTACACCAAGT	ACTTGGTGTAAG	GBC106
1497	3339	Lalvin_T73	TATCGTTGACCA	TGGTCAACGATA	GBC5		AACACAAGGAGT	ACTCCTTGTGTT	GBC102
1501	3381	Hybrid	GTATGC-CTGTA	TACAG-GCATAC	GBC10	deletion in barcode	ACCACATACATC	GATGTATGTGGT	GBC101
1502	3031	Fusion	TTACTGTGCGAT	ATCGCACAGTAA	GBC6		CTTACACCAAGT	ACTTGGTGTAAG	GBC106
1503	3346	Hybrid	CTAACCTCCGCT	AGCGGAGGTTAG	GBC8		TGACCTCCAAGA	TCTTGGAGGTCA	GBC107
1504	3083	Hybrid	GGAGACAAGGGA	TCCCTTGTCTCC	GBC1		TACTTCGCTCGC	GCGAGCGAAGTA	GBC104
1505	3068	Cerebray	TTACTGTGCGAT	ATCGCACAGTAA	GBC6		TGACCTCCAAGA	TCTTGGAGGTCA	GBC107
1537	3032	Vin_13	CTAACCTCCGCT	AGCGGAGGTTAG	GBC8		ACAAGGAGGTGA	TCACCTCCTTGT	GBC108
1638	3033	Platinum	CCAGTGTATGCA	TGCATACACTGG	GBC13		ACAAGGAGGTGA	TCACCTCCTTGT	GBC108
1686	3034	Bannockburn_38425	GTACATACCGGT	ACCGGTATGTAC	GBC11		AATGTCCGTGAC	GTCACGGACATT	GBC103
1688	3382	Zymaflore_VL3c	AATCCGTACAGC	GCTGTACGGATT	GBC3		AATGTCCGTGAC	GTCACGGACATT	GBC103
1706	3335	YW 8130	GTACATACCGGT	ACCGGTATGTAC	GBC11		ACCACATACATC	GATGTATGTGGT	GBC101
1709	3065	Wolf	AATCCGTACAGC	GCTGTACGGATT	GBC3		TACTTCGCTCGC	GCGAGCGAAGTA	GBC104
1712	3342	YW8134	AATCCGTACAGC	GCTGTACGGATT	GBC3		GCTTCGGTAGAT	ATCTACCGAAGC	GBC105
1716	3074	Petaluma_1A	ACACCTGGTGAT	ATCACCAGGTGT	GBC4		TGACCTCCAAG-	-CTTGGAGGTCA	GBC107	deletion in barcode
1722	3035	CBS_7045	ACACCTGGTGAT	ATCACCAGGTGT	GBC4		ACGAGGAGGTGA	TCACCTCCTCGT	GBC108	substitution in barcode
1729	3349	YW8003	TTACTGTGCGAT	ATCGCACAGTAA	GBC6		ACAAGGAGGTGG	CCACCTCCTTGT	GBC108	substitution in barcode
1736	3341	YW8154	GTACATACCGGT	ACCGGTATGTAC	GBC11		TACTTCGCTCGC	GCGAGCGAAGTA	GBC104
1742	3084	YW8205	GGAGACAAGGGA	TCCCTTGTCTCC	GBC1		CTTACACCAAGT	ACTTGGTGTAAG	GBC106
1756	3064	Morey_St_Denis	TATCGTTGACCA	TGGTCAACGATA	GBC5		AATGTCCGTGAC	GTCACGGACATT	GBC103
1757	3340	Chateau_d'Yquem	AGGCTACACGAC	GTCGTGTAGCCT	GBC7		AATGTCCGTGAC	GTCACGGACATT	GBC103
1758	3036	Haut-Brion_1	AGGCTACACGAC	GTCGTGTAGCCT	GBC7		TACTTCGCTCGC	GCGAGCGAAGTA	GBC104
1759	3037	Chateau_Cantemerle	AGGCTACACGAC	GTCGTGTAGCCT	GBC7		GCTTCGGTAGAT	ATCTACCGAAGC	GBC105
1760	3338	Gruaud_Larose	GTACATACCGGT	ACCGGTATGTAC	GBC11		AACACAAGGAGT	ACTCCTTGTGTT	GBC102
1776	3075	Massey_GF7	AATCCGTACAGC	GCTGTACGGATT	GBC3		CTTACACCAAGT	ACTTGGTGTAAG	GBC106
1778	3038	Massey_GF8C	TATCGTTGACCA	TGGTCAACGATA	GBC5		TACTTCGCTCGC	GCGAGCGAAGTA	GBC104
1781	3039	YW8316_Yquem	GAACCAAAGGAT	ATCCTTTGGTTC	GBC9		ACAAGGAGGTGA	TCACCTCCTTGT	GBC108
1787	3370	YW8323	GTACATACCGG-	-CCGGTATGTAC	GBC11	deletion in barcode	GCTTCGGTAGAT	ATCTACCGAAGC	GBC105
1795	3373	Henri-Martin_8130	TATCGTTGACCA	TGGTCAACGATA	GBC5		GCTTCGGTAGAT	ATCTACCGAAGC	GBC105
1796	3110	YW8413	GTACATACCGGT	ACCGGTATGTAC	GBC11		CTTACACCAAGT	ACTTGGTGTAAG	GBC106
1833	3076	Uvaferm_43	TCCGACACAATT	AATTGTGTCGGA	GBC12		TACTTCGCTCGC	GCGAGCGAAGTA	GBC104
1910	3069	NCYC_738	GTACATACCGGT	ACCGGTATGTAC	GBC11		TGACCTCCAAGA	TCTTGGAGGTCA	GBC107
1918	3077	DSIR_Wine_Research__R102	TCCGACACAATT	AATTGTGTCGGA	GBC12		GCTTCGGTAGAT	ATCTACCGAAGC	GBC105
2013	3040	Blastocel_Grand_Cru	TATCGTTGACCA	TGGTCAACGATA	GBC5		CTTACACCAAGT	ACTTGGTGTAAG	GBC106
2077	3383	Lalvin_ICV_D21	TCCGACACAATT	AATTGTGTCGGA	GBC12		CTTACACCAAGT	ACTTGGTGTAAG	GBC106
2078	3041	Lalvin_CY3079	GTATGCGCTGTA	TACAGCGCATAC	GBC10		GCTTCGGTAGAT	ATCTACCGAAGC	GBC105
2079	3042	Enoferm_T306	GTATGCGCTGTA	TACAGCGCATAC	GBC10		CTTACACCAAGT	ACTTGGTGTAAG	GBC106
2255	3078	Uvaferm_HPS	CTAACCTCCGCT	AGCGGAGGTTAG	GBC8		TACTTCGCTCGC	GCGAGCGAAGTA	GBC104
2260	3043	Lalvin_QA23	GTATGCGCTGTA	TACAGCGCATAC	GBC10		TGACCTCCAAGA	TCTTGGAGGTCA	GBC107
2308	3368	Brocksopp_1	GTATGCGCTGTA	TACAGCGCATAC	GBC10		TACTTCGCTCGC	GCGAGCGAAGTA	GBC104
2776	3348	NT_116	GTACATACCGGT	ACCGGTATGTAC	GBC11		ACAAGGAGGTGA	TCACCTCCTTGT	GBC108
2851	3086	Actiflore_Rose	AATCAGTCTCGT	ACGAGACTGATT	GBC2		AACACAAGGAGT	ACTCCTTGTGTT	GBC102
2852	3079	Zymaflore_F15	TCCGACACAATT	AATTGTGTCGGA	GBC12		ACAAGGAGGTGA	TCACCTCCTTGT	GBC108
2858	3044	Zymaflore_VL1	AATCAGTCTCGT	ACGAGACTGATT	GBC2		AATGTCCGTGAC	GTCACGGACATT	GBC103
2861	3045	Zymaflore_X5	AATCAGTCTCGT	ACGAGACTGATT	GBC2		TACTTCGCTCGC	GCGAGCGAAGTA	GBC104
2863	3347	Collection_Cepage_Chardonnay	GGAGACAAGGGA	TCCCTTGTCTCC	GBC1		ACAAGGAGGTGA	TCACCTCCTTGT	GBC108
2865	3345	Collection_Cepage_Pinot	AATCGGTACAGC	GCTGTACCGATT	GBC3	sustitution in barcode	TGACCTCCAAGA	TCTTGGAGGTCA	GBC107
2866	3344	Collection_Cepage_Sauvignon_Blanc	GGAGACAAGGGA	TCCCTTGTCTCC	GBC1		TGACCTCCAAGA	TCTTGGAGGTCA	GBC107
2867	3046	Collection_Cepage_Syrah	AATCAGTCTCGT	ACGAGACTGATT	GBC2		GCTTCGGTAGAT	ATCTACCGAAGC	GBC105
2874	3047	Fermicru_VR5	AATCCGTACAGC	GCTGTACGGATT	GBC3		ACAAGGAGGTGA	TCACCTCCTTGT	GBC108
2878	3048	NT_112	AATCAGTCTCGT	ACGAGACTGATT	GBC2		CTTACACCAAGT	ACTTGGTGTAAG	GBC106
2880	3049	NT_50	AATCAGTCTCGT	ACGAGACTGATT	GBC2		TGACCTCCAAGA	TCTTGGAGGTCA	GBC107
2881	3070	Vin_2000	AATCAGTCTCGT	ACGAGACTGATT	GBC2		ACAAGGAGGTGA	TCACCTCCTTGT	GBC108
2910	3343	Maurivin_Elegance	TTACTGTGCGAT	ATCGCACAGTAA	GBC6		GCTTCGGTAGAT	ATCTACCGAAGC	GBC105
2913	3384	Maurivin_Sauvignon	CCAGTGTATGCA	TGCATACACTGG	GBC13		CTTACACCAAGT	ACTTGGTGTAAG	GBC106
2914	3369	Maurivin_UOA_Maxithiol	GTATGCGCTGTA	TACAGCGCATAC	GBC10		AATGTCCGTGAC	GTCACGGACATT	GBC103

## Sheet: T2_Primer_list
Names of sequences and primers used in the construction and confirmation of barcode inserts, and in the creation of amplicons for sequencing of a pooled barcode collection
Transformation cassette primers, first round PCR
Primer name	Illumina read 1 sequencing primer	Barcode	pUG6 primer	final primer sequence	length
pUG6_GBC1_F	cctacacgacgctcttccgatct	tcccttgtctcc	gtacgctgcaggtcgacaac	cctacacgacgctcttccgatcttcccttgtctccgtacgctgcaggtcgacaac	55
pUG6_GBC2_F	cctacacgacgctcttccgatct	acgagactgatt	gtacgctgcaggtcgacaac	cctacacgacgctcttccgatctacgagactgattgtacgctgcaggtcgacaac	55
pUG6_GBC3_F	cctacacgacgctcttccgatct	gctgtacggatt	gtacgctgcaggtcgacaac	cctacacgacgctcttccgatctgctgtacggattgtacgctgcaggtcgacaac	55
pUG6_GBC4_F	cctacacgacgctcttccgatct	atcaccaggtgt	gtacgctgcaggtcgacaac	cctacacgacgctcttccgatctatcaccaggtgtgtacgctgcaggtcgacaac	55
pUG6_GBC5_F	cctacacgacgctcttccgatct	tggtcaacgata	gtacgctgcaggtcgacaac	cctacacgacgctcttccgatcttggtcaacgatagtacgctgcaggtcgacaac	55
pUG6_GBC6_F	cctacacgacgctcttccgatct	atcgcacagtaa	gtacgctgcaggtcgacaac	cctacacgacgctcttccgatctatcgcacagtaagtacgctgcaggtcgacaac	55
pUG6_GBC7_F	cctacacgacgctcttccgatct	gtcgtgtagcct	gtacgctgcaggtcgacaac	cctacacgacgctcttccgatctgtcgtgtagcctgtacgctgcaggtcgacaac	55
pUG6_GBC8_F	cctacacgacgctcttccgatct	agcggaggttag	gtacgctgcaggtcgacaac	cctacacgacgctcttccgatctagcggaggttaggtacgctgcaggtcgacaac	55
pUG6_GBC9_F	cctacacgacgctcttccgatct	atcctttggttc	gtacgctgcaggtcgacaac	cctacacgacgctcttccgatctatcctttggttcgtacgctgcaggtcgacaac	55
pUG6_GBC10_F	cctacacgacgctcttccgatct	tacagcgcatac	gtacgctgcaggtcgacaac	cctacacgacgctcttccgatcttacagcgcatacgtacgctgcaggtcgacaac	55
pUG6_GBC11_F	cctacacgacgctcttccgatct	accggtatgtac	gtacgctgcaggtcgacaac	cctacacgacgctcttccgatctaccggtatgtacgtacgctgcaggtcgacaac	55
pUG6_GBC12_F	cctacacgacgctcttccgatct	aattgtgtcgga	gtacgctgcaggtcgacaac	cctacacgacgctcttccgatctaattgtgtcggagtacgctgcaggtcgacaac	55
pUG6_GBC13_F	cctacacgacgctcttccgatct	tgcatacactgg	gtacgctgcaggtcgacaac	cctacacgacgctcttccgatcttgcatacactgggtacgctgcaggtcgacaac	55
Primer name	Illumina multiplex read 2 sequencing primer	Barcode	pUG6 primer
pUG6_GBC101_R	cagacgtgtgctcttccgatct	accacatacatc	cataggccactagtggatctgat	cagacgtgtgctcttccgatctaccacatacatccataggccactagtggatctgat	57
pUG6_GBC102_R	cagacgtgtgctcttccgatct	aacacaaggagt	cataggccactagtggatctgat	cagacgtgtgctcttccgatctaacacaaggagtcataggccactagtggatctgat	57
pUG6_GBC103_R	cagacgtgtgctcttccgatct	aatgtccgtgac	cataggccactagtggatctgat	cagacgtgtgctcttccgatctaatgtccgtgaccataggccactagtggatctgat	57
pUG6_GBC104_R	cagacgtgtgctcttccgatct	tacttcgctcgc	cataggccactagtggatctgat	cagacgtgtgctcttccgatcttacttcgctcgccataggccactagtggatctgat	57
pUG6_GBC105_R	cagacgtgtgctcttccgatct	gcttcggtagat	cataggccactagtggatctgat	cagacgtgtgctcttccgatctgcttcggtagatcataggccactagtggatctgat	57
pUG6_GBC106_R	cagacgtgtgctcttccgatct	cttacaccaagt	cataggccactagtggatctgat	cagacgtgtgctcttccgatctcttacaccaagtcataggccactagtggatctgat	57
pUG6_GBC107_R	cagacgtgtgctcttccgatct	tgacctccaaga	cataggccactagtggatctgat	cagacgtgtgctcttccgatcttgacctccaagacataggccactagtggatctgat	57
pUG6_GBC108_R	cagacgtgtgctcttccgatct	acaaggaggtga	cataggccactagtggatctgat	cagacgtgtgctcttccgatctacaaggaggtgacataggccactagtggatctgat	57
pUG6_GBC109_R	cagacgtgtgctcttccgatct	tatcaggtgtgc	cataggccactagtggatctgat	cagacgtgtgctcttccgatcttatcaggtgtgccataggccactagtggatctgat	57
Transformation cassette primers, second round PCR
primer name	HO homologous sequence	Illumina adaptor homologous sequence
HOssExt_IllumSeq_Fv6	gacatcgcaaacgtcacggctaactcttacgttatgtgcgcagatggctccgctgcccgcgtcataaatgtcacacagg	ctctttcccctacacgac
HOssExt_IllumSeq_Rv6	ctgcgttgttaccacaactcttatgaggcccgcggacagcatcaaactgtaagattccgccacattttatacactctg	gactggagttcagacgtgtg
Genomic amplification primers
Primer name	P5 Adapter sequence	i5 Index	Illumina read 1 sequencing primer
Illum_P5_S501	aatgatacggcgaccaccgagatctacac	tagatcgc	acactctttccctacacgacgctcttccgatct	aatgatacggcgaccaccgagatctacactagatcgcacactctttccctacacgacgctcttccgatct	70
Illum_P5_S502	aatgatacggcgaccaccgagatctacac	ctctctat	acactctttccctacacgacgctcttccgatct	aatgatacggcgaccaccgagatctacacctctctatacactctttccctacacgacgctcttccgatct	70
Illum_P5_S503	aatgatacggcgaccaccgagatctacac	tatcctct	acactctttccctacacgacgctcttccgatct	aatgatacggcgaccaccgagatctacactatcctctacactctttccctacacgacgctcttccgatct	70
Illum_P5_S504	aatgatacggcgaccaccgagatctacac	agagtaga	acactctttccctacacgacgctcttccgatct	aatgatacggcgaccaccgagatctacacagagtagaacactctttccctacacgacgctcttccgatct	70
Illum_P5_S505	aatgatacggcgaccaccgagatctacac	gtaaggag	acactctttccctacacgacgctcttccgatct	aatgatacggcgaccaccgagatctacacgtaaggagacactctttccctacacgacgctcttccgatct	70
Illum_P5_S506	aatgatacggcgaccaccgagatctacac	actgcata	acactctttccctacacgacgctcttccgatct	aatgatacggcgaccaccgagatctacacactgcataacactctttccctacacgacgctcttccgatct	70
Illum_P5_S507	aatgatacggcgaccaccgagatctacac	aaggagta	acactctttccctacacgacgctcttccgatct	aatgatacggcgaccaccgagatctacacaaggagtaacactctttccctacacgacgctcttccgatct	70
Illum_P5_S508	aatgatacggcgaccaccgagatctacac	ctaagcct	acactctttccctacacgacgctcttccgatct	aatgatacggcgaccaccgagatctacacctaagcctacactctttccctacacgacgctcttccgatct	70
	P7 adaptor sequence	i7 index	Illumina read 2 sequencing primer
Illum_P7_N701	caagcagaagacggcatacgagat	taaggcga	gtgactggagttcagacgtgtgctcttccgatct	caagcagaagacggcatacgagattaaggcgagtgactggagttcagacgtgtgctcttccgatct	66
Illum_P7_N702	caagcagaagacggcatacgagat	cgtactag	gtgactggagttcagacgtgtgctcttccgatct	caagcagaagacggcatacgagatcgtactaggtgactggagttcagacgtgtgctcttccgatct	66
Illum_P7_N703	caagcagaagacggcatacgagat	aggcagaa	gtgactggagttcagacgtgtgctcttccgatct	caagcagaagacggcatacgagataggcagaagtgactggagttcagacgtgtgctcttccgatct	66
Illum_P7_N704	caagcagaagacggcatacgagat	tcctgagc	gtgactggagttcagacgtgtgctcttccgatct	caagcagaagacggcatacgagattcctgagcgtgactggagttcagacgtgtgctcttccgatct	66
Illum_P7_N705	caagcagaagacggcatacgagat	ggactcct	gtgactggagttcagacgtgtgctcttccgatct	caagcagaagacggcatacgagatggactcctgtgactggagttcagacgtgtgctcttccgatct	66
Illum_P7_N706	caagcagaagacggcatacgagat	taggcatg	gtgactggagttcagacgtgtgctcttccgatct	caagcagaagacggcatacgagattaggcatggtgactggagttcagacgtgtgctcttccgatct	66
Illum_P7_N707	caagcagaagacggcatacgagat	ctctctac	gtgactggagttcagacgtgtgctcttccgatct	caagcagaagacggcatacgagatctctctacgtgactggagttcagacgtgtgctcttccgatct	66
Illum_P7_N708	caagcagaagacggcatacgagat	cagagagg	gtgactggagttcagacgtgtgctcttccgatct	caagcagaagacggcatacgagatcagagagggtgactggagttcagacgtgtgctcttccgatct	66
Illum_P7_N709	caagcagaagacggcatacgagat	gctacgct	gtgactggagttcagacgtgtgctcttccgatct	caagcagaagacggcatacgagatgctacgctgtgactggagttcagacgtgtgctcttccgatct	66
Illum_P7_N710	caagcagaagacggcatacgagat	cgaggctg	gtgactggagttcagacgtgtgctcttccgatct	caagcagaagacggcatacgagatcgaggctggtgactggagttcagacgtgtgctcttccgatct	66
Illum_P7_N711	caagcagaagacggcatacgagat	aagaggca	gtgactggagttcagacgtgtgctcttccgatct	caagcagaagacggcatacgagataagaggcagtgactggagttcagacgtgtgctcttccgatct	66
Illum_P7_N712	caagcagaagacggcatacgagat	gtagagga	gtgactggagttcagacgtgtgctcttccgatct	caagcagaagacggcatacgagatgtagaggagtgactggagttcagacgtgtgctcttccgatct	66
Confirmation primers
KanMX_Tef1t_F	cgccgccatccagtgtcg
KanMX_Tef1t_F	cgccgccatccagtgtcg
KanB	ctgcagcgaggagccgtaat
HOConf1	gggttcgcaagtcctgtttctatg
CVHO_R	gagaaagttgatcaagaccc
KanMX_U21	cctccttgacagtcttgacg

## Sheet: T3_Insert_sequence_actual
Sequence inserted at HO locus for each strain. The sequence of the inserted element within in each transformed strain (AWRI number (source)) was determined by Sanger sequencing. The curated sequence data has been broken into functional segments and tabluated. Deletions are indicated by a (-).
AWRI number (source)	illumina read 1 sequencing primer	BC1	LoxP Sequence	BC2	Illumina Read 2 sequencing primer
81	GACTGGAGTTCAGACGTGTGCTCTTCCGATCT	ACCACATACATC	CATAGGCCACTAGTGGATCTGATATCACCTAATAACTTCGTATAGCATACATTATACGAAGTTATATTAAGGGTTGTCGACCTGCAGCGTAC	GAACCAAAGGAT	AGATCGGAAGAGCGTCGTGTAGGGGAAAGAG
170	GACTGGAGTTCAGACGTGTGCTCTTCCGATCT	ACCACATACATC	CATAGGCCACTAGTGGATCTGATATCACCTAATAACTTCGTATAGCATACATTATACGAAGTTATATTAAGGGTTGTCGACCTG-AGCGTAC	TTACTGTGCGAT	AGATCGGAAGAGCGTCGTGTAGGGGAAAGAG
213	GACTGGAGTTCAGACGTGTGCTCTTCCGATCT	ACCACATACATC	CATAGGCCACTAGTGGATCTGATATCACCTAATAACTTCGTATAGCATACATTATACGAAGTTATATTAAGGGTTGTCGACCTGCAGCGTAC	ACACCTGGTGAT	AGATCGGAAGAGCGTCGTGTAGGGGAAAGAG
228	GACTGGAGTTCAGACGTGTGCTCTTCCGATCT	GCTTCGGTAGAT	CATAGGCCACTAGTGGATCTGATATCACCTAATAACTTCGTATAGCATACATTATACGAAGTTATATTAAGGGTTGTCGACCTGCAGCGTAC	GGAGACAAGGGA	AGATCGGAAGAGCGTCGTGTAGGGGAAAGAG
266	GACTGGAGTTCAGACGTGTGCTCTTCCGATCT	AACACAAGGAGT	CATAGGCCACTAGTGGATCTGATATCACCTAATAACTTCGTATAGCATACATTATACGAAGTTATATTAAGGGTTGTCGACCTGCAGCGTAC	ACACCTGGTGAT	AGATCGGAAGAGCGTCGTGTAGGGGAAAGAG
722	GACTGGAGTTCAGACGTGTGCTCTTCCGATCT	ACCACATACATC	CATAGGTCACTAGTGGATCTGATATCACCTAATAACTTCGTATAGCATACATTATACGAAGTTATATTAAGGGTTGTCGACCTGCAGCGTAC	AATCAGTCTCGT	AGATCGGAAGAGCGTCGTGTAGGAGAAAGAG
724	GACTGGAGTTCAGACGTGTGCTCTTCCGATCT	ACCACATACATC	CATAGGCCACTAGTGGATCTGATATCACCTAATAACTTCGTATAGCATACATTATACGAAGTTATATTAAGGGTTGTCGACCTGCAGCGTAC	GGAGACAAGGGA	AGATCGGAAGAGCGTCGTGTAGGGGAAAGAG
735	GACTGGAGTTCAGACGTGTGCTCTTCCGATCT	AACACAAGGAGT	CATAGGCCACTAGTGGATCTGATATCACCTAATAACTTCGTATAGCATACATTATACGAAGTTATATTAAGGGTTGTCGACCTGCAGCGTAC	TTACTGTGCGAT	AGATCGGAAGAGCGTCGTGTAGGGGAAAGAG
739	GACTGGAGTTCAGACGTGTGCTCTTCCGATCT	AACACAAGGAGT	CATAGGCCACTAGTGGATCTGATATCACCTAATAACTTCGTATAGCATACATTATACGGAGTTATATTAAGGGTTGTCGACCTGCAGCGTAC	GGAGACAAGAGA	AGATCGGAAGAGCGTCGTGTA--GGAAAGAG
740	GACTGGAGTTCAGACGTGTGCTCTTCCGATCT	ACCACATACATC	CATAGGCCACTAGTGGTTCTGATATCACCTAATAACTTCGTATAGCATACATTATACGAAGTTATATTAAGGGTTGTCGACCTGCAGCGTAC	CTAACCTCCGCT	AGATCGGAAGAGCGTCGTGTAGGGGAAAGAG
763	GACTGGAGTT-AGACGTGTGCTCTTCCGATCT	AATGTCCGTGAC	CATAGGCCACTAGTGGATCTGATATCACCTAATAACTTCGTATAGCATACATTATACGAAGTTATATTAAGGGTTGTCGACCTGCAGCGTAC	TTACTGTGCGAT	AGATCGGAAGAGCGTCGTGTAGGGGAAAGAG
767	GACTGGAGTTCAGACGTGTGCTCTTCCGATCT	ACCACATACATC	CATAGGCCACTAGTGGATCTGATATCACCTAATAACTTCGTATAGCATACATTATACGAAGTTATATTAAGGGTTGTCGACCTGCAGCGTAC	CCAGTGTATGCA	AGATCGGAAGAGCGTCGTGTAGGGGAAAGAG
778	GACTGGAGTTCAGACGTGTGCTCTTCCGATCT	AATGTCCGTGAC	CATAGGCCACTAGTGGATCTGATATCACCTAATAACTTCGTATAGCATACATTATACGAAGTTATATTAAGGGTTGTCGACCTGCAGCGTAC	ACACCTGGTGAT	AGATCGGAAGAGCGTCGTGTAGGGGAAAGAG
793	GACTGGAGTTCAGACGTGTGCTCTTCCGATCT	ACCACATACATC	CATAGGCCACTAGTGGATCTGATATCACCTAATAACTTCGTATAGCATACATTATACGAAGTTATATTAGGGGTTGTCGACCTGCAGCGTAC	-GGCTACACGAC	AGATCGGAAGAGCGTCGTGTGGGGGAAAGAG
796	GACTGGAGTTCAGACGTGTGCTCTTCCGATCT	AACACAAGGAGT	CATAGGCCACTAGT-GATCTGATATCACCTAATAACTTCGTATAGCATACATTATACGAAGTTATATTAAGGGTTGTCGACCTGCAGCGTAC	GAACCAAAGGAT	AGATCGGAAGAGCGTCGTGTAGGAGAAAGAG
833	GACTGGAGTTCAGACGTGTGCTCTTCCGATCT	TACTTCGCTCGC	CATAGGCCACTAGTGGATCTGATATCACCTAATAACTTCGTATAGCATACATTATACGAAGTTATATTAAGGGTTGTCGACCTGCAGCGTAC	ACACCTGGTGAT	AGATCGGAAGAGCGTCGTGTAGGGGAAAGAG
838	GACTGGAGTTCAGACGTGTGCTCTTCCGATCT	AATGTCCGTGAC	CATAGGCCACTAGTGGATCTGATATCACCTAATAACTTCGTATAGCATACATTATACGAAGTTATATTAAGGGTTGTCGACCTGCAGCGTAC	GAACCAAAGGAT	AGATCGGAAGAGCGTCGTGTAGGGGAAAGAG
896	GACTGGAGTTCAGACGTGTGCTCTTCCGATCT	AACACAAGGAGT	CATAGGCCACTAGTGGATCTGATATCACCTAATAACTTCGTATAGCATACATTATACGAAGTTATATTAAGGGTTGTCGACCTGCAGCGTAC	CTAACCTCCGCT	AGATCGGAAGAGCGTCGTGTA-GGGAAAGAG
934	GACTGGAGTTCAGACGTGTGCTCTTCCGATCT	AATGTCCGTGAC	CATAGGCCACTAGTGGATCTGATATCACCTAATAACTTCGTATAGCATACATTATACGAAGTTATATTAAGGGTTGTCGACCTGCAGCGTAC	GGAGACAAGGGA	AGATCGGAAGAGCGTCGTGTAGGGGAAAGAG
935	GACTGGAGTTCAGACGTGTGCTCTTCCGATCT	AATGTCCGTGAC	CATAGGCCACTAGTGGATCTGATATCACCTAATAACTTCGTATAGCATACATTATACGAAGTTATATTAAGGGTTGTCGACCTGCAGCGTAC	CCAGTGTATGCA	AGATCGGAAGAGCGTCGTGTAGGGG-AAGAG
947	GACTGGAGTTCAGACGTGTGCTCTTCCGATCT	AATGTCCGTGAC	CATAGGCCACTAGTGGATCTGATATCACCTAATAACTTCGTATAGCATACATTATACGAAGTTATATTAAGGGTTGTCGACCTGCAGCGTAC	CTAACCTCCGCT	AGATCGGAAGAGCGTCGTGTAGGGGAAAGAG
1001	GACTGGAGTTCAGACGTGTGCTCTTCCGATCT	TACTTCGCTCGC	CATAGGCCACTAGTGGATCTGATATCACCTAATAACTTCGTATAGCATACATTATACGAAGTTATATTAAGGGTTGTCGACCTGCAGCGTAC	TTACTGTGCGAT	AGATCGGAAGAGCGTCGTGTAGGGGAAAGAG
1017	GACTGGAGTTCAGACGTGTGC-CTTCCGATCT	TACTTCGCTCGC	CATAGGCCACTAGTGGATCTGATATCACCTAATAACTTCGTATAGCATACATTATACGAAGTTATATTAAGGGTTGTCGACCTGCAGCGTAC	GAACCAAAGGAT	AGATCGGAAGAGCGTCGTGTAGGGGAAAGAG
1077	GACTGGAGTTCAGACGTGTGCTCTTCCGATCT	TACTTCGCTCGC	CATAGGCCACTAGTGGATCTGATATCACCTAATAACTTCGTATAGCATACATTATACGAAGTTATATTAAGGGTTGTCGACCTGCAGCGTAC	CCAGTGTATGCA	AGATCGGAAGAGCGTCGTGTAGGGGAAAGAG
1082	GACTGGAGTTCAGACGTGTGCTCTTCCGATCT	ACCACATACATC	CATAGGCCACTAGTGGATCTGATATCACCTAATAACTTCGTATAGCATACATTATACGAAGTTATATTAAGGGTTGTCGACCTGCAGCGTAC	AATCCGTACAGC	AGATCGGAAGAGCGTCGTGTAGGGGAAAGAG
1427	GACTGGAGTTCAGACGTGTGCTCTTCCGATCT	GCTTCGGTAGAT	CATAGGCCACTAGTGGATCTGATATCACCTAATAACTTCGTATAGCATACATTATACGAAGTTATATTAAGGGTTGTCGACCTGCAGCGTAC	CCAGTGTATGCA	AGATCGGGAGAGCGTCGTGTA-GGGAAAGAG
1429	GACTGGAGTTCAGACGTGTGCTCTTCCGATCT	GCTTCGGTAGAT	CATAGGCCACTAGTGGATCTGATATCACCTAATAACTTCGTATAGCATACATTATACGAAGTTATATTAAGGGTTGTCGACCTGCAGCGTAC	ACACCTGGTGAT	AGATCGGAAGAGCGTCGTGTAGGGGAAAGAG
1430	GACTGGAGTTCAGACGTGTGCTCTTCCGATCT	ACAAGGAGGTGA	CATAGGCCACTAGTGGATCTGATATCACCTAATAACTTCGTATAGCATACATTATACGAAGTTATATTAAGGGTTGTCGACCTGCAGCGTAC	GTATGCGCT-TA	AGATCGG-AGAGCGTCGTGTAGGGGAAAGAG
1432	GACTGGAGTTCAGACGTGTGCTCTTCCGATCT	GCTTCGGTAGAT	CATAGGCCACTAGTGGATCTGATATCACCTAATAACTTCGTATAGCATACATTATACGAAGTTATATTAAGGGTTGTCGACCTGCAGCGTAC	GAACCAAAGGAT	AGATCGGAAGAGCGTCGTGTAGGGGAAAGAG
1436	GACTGGAGTTCAGACGTGTGCTCTTCCGATCT	ACCACATACATC	CATAGGCCACTAGTGGATCTGATATCACCTAATAACTTCGTATAGCATACATTATACGAAGTTATATTAAGGGTTGTCGACCTGCAGCGTAC	TATCGTTGACCA	AGATCGGAAGAGCGTCGTGTAGGGGAAAGAG
1482	GACTGGAGTTCAGACGTGTGCTCTTCCGATCT	ACCACATACATC	CATAGGCCACTAGTGGATCTGATATCACCTAATAACTTCGTACAGCATACATTATACGAAGTTATATTAAGGGTTGTCGACCTGCAGCGTAC	TCCGACACAATT	AGATCGGAAGAGCGTCGTGTAGGGGAAAGAG
1483	GACTGGAGTTCAGACGTGTGCTCTTCCGATCT	TACTTCGCTCGC	CATAGGCCACTAGTGGATCTGATATCACCTAATAACTTCGTATAGCATACATTATACGAAGTTATATTAAGGGTTGTCGACCTGCAGCGTAC	CTAACCTCCGCT	AGATCGGAAGAGCGTCGTGTAGGGGAAAGAG
1485	GACTGGAGTTCAGACGTGTGCTCTTCCGATCT	AACACAAGGAGT	CATAGGCCACTAGTGGATCTGATATCACCTAATAACTTCGTATAGCAGACATTATACGAAGTTATATTAAGGGTTGTCGACCTGCAGCGTAC	TCCGACACAATT	AGATCGGAAGAGCGTCGTGTAGGGGAAAGAG
1486	GACTGGAGTTCAGACGTGTGCTCTTCCGATCT	CTTACACCAAGT	CATAGGCCACTAGTGGATCTGATATCACCTAATAACTTCGTATAGCATACATTATACGAAGTTATATTAAGGGTTGTCGACCTGCAGCGTAC	GAACCAAAGGAT	AGATCGGAAGAGCGTCGTGTAGGGGAAAGAG
1487	GACTGGAGTTCAGACGTGTGCTCTTCCGATCT	GCTTCGGTAGAT	CATAGGCCACTAGTGGGTCTGATATCACCTAATAACTTCGTATAGCATACATTATACGAAGTTATATTAAGGGTTGTCGACCTGCAGCGTAC	CTAACCTCCGCT	AGATCGGAAGAGCGTCGTGTAGGGGAAAGAG
1488	GACTGGAGTTCAGACGTGTGCTCTTCCGATCT	TGACCTCCAAGA	CATAGGCCACTAGTGGATCTGATATCACCTAATAACTTCGTATAGCATACATTATACGAAGTTATATTAAGGGTTGTCGACCTGCAGCGTAC	GAACCAAAGGAT	AGATCGGAAGAGCGTCGTGTAGGGGAAAGAG
1490	GACTGGAGTTCAGACGTGTGCTCTTCCGATCT	ACAAGGAGGTGA	CATAGGCCACTAGTGGATCTGATATCACCTAATAACTTCGTATAGCATACATTATACGAAGTTATATTAAGGGTTGTCGACCTGCAGCGTAC	TATCGTTGACCA	AGATCGGAAGAGCGT-GTGTAGGGGAAAGAG
1491	GACTGGAGTTCAGACGTGTGCTCTTCCGATCT	AATGTCCGTGAC	CATAGGCCACTAGTGGATCTGATATCACCTAATAACTTCGTATAGCATACATTATACGAAGTTATATTAAGGGTTGTCGACCTGCAGCGTAC	TCCGACACAATT	AGATCGGAAGAGCGTCGTGTAGGGGAAAGAG
1493	GACTGGAGTTCAGACGTGTGCTCTTCCGATCT	CTTACACCAAGT	CATAGGCCACTAGTGGATCTGATATCACCTAATAACTTCGTATAGCATACATTATACGAAGTTATATTAAGGGTTGTCGACCTGCAGCGTAC	CTAACCTCCGCT	AGATCGGAAGAGCGTCGTGTAGGGGAAAGAG
1497	GACTGGAGTTCAGACGTGTGCTCTTCCGATCT	AACACAAGGAGT	CATAGGCCACTAGTGGATCTGATATCACCTAATAACTTCGTATAGCATACATTATACGAAGTTATATTAAGGGTTGTCGACCTGCAGCGTAC	TATCGTTGACCA	AGATCGGAAGAGCGTCGTGTAGGGGAAAGAG
1501	GACTGGAGTTCAGACGTGTGCTCTTCCGATCT	ACCACATACATC	CATAGGCCACTAGTGGATCTGATATCACCTAATAACTTCGTATAGCATACATTATACGAAGTTATATTAAGGGTTGTCGACCT-CAGCGTAC	GTATGC-CTGTA	AGATCGGAAGAGCGTCGTGTAGGGGAAAGAG
1502	GACTGGAGTTCAGACGTGTGCTCTTCCGATCT	CTTACACCAAGT	CATAGGCCACTAGTGGATCTGATATCACCTAATAACTTCGTATAGCATACATTATACGAAGTTATATTAAGGGTTGTCGACCTGCAGCGTAC	TTACTGTGCGAT	AGATCGGAAGAGCGTCGTGTAGGGGAAAGAG
1503	GACTGGAGTTCAGACGTGTGCTCTTCCGATCT	TGACCTCCAAGA	CATAGGCCACTAGTGGATCTGATATCACCTAATAACTTCGTATAGCATACATTATACGAAGTTATATTAAGGGTTGTCGACCTGCAGCGTAC	CTAACCTCCGCT	AGATCGGAAGAGCGTCGTGTAGGGG-AAGAG
1504	GACTGGAGTTCAGACGTGTGCTCTTCCGATCT	TACTTCGCTCGC	CATAGGCCACTAGCGGATCTGATATCACCTAATAACTTCGTATAGCATACATTATACGAAGTTATATTAAGGGTTGTCGACCTGCAGCGTAC	GGAGACAAGGGA	AGATCGGAAGAGCGTCGTGTAGGGGAAAGAG
1505	GACTGGAGTTCAGACGTGTGCTCTTCCGATCT	TGACCTCCAAGA	CATAGGCCACTAGTGGATCTGATATCACCTAATAACTTCGTATAGCATACATTATACGAAGTTATATTAAGGGTTGTCGACCTGCAGCGTAC	TTACTGTGCGAT	AGATCGGAAGAGCGTCGTGTAGGGGAAAGAG
1537	GACTGGAGTTCAGACGTGTGCTCTTCCGATCT	ACAAGGAGGTGA	CATAGGCCACTAGTGGATCTGATATCACCTAATAACTTCGTATAGCATACATTATACGAAGTTATATTAAGGGTTGTCGACCTGCAGCGTAC	CTAACCTCCGCT	AGATCGGAAGAGCGTCGTGTAGGGGAAAGAG
1638	GACTGGAGTTCAGACGTGTGCTCTTCCGATCT	ACAAGGAGGTGA	CATAGGCCACTAGTGGATCTGATATCACCTAATAACTTCGTATAGCATACATTATACGAAGTTATATTAAGGGTTGTCGACCTGCAGCGTAC	CCAGTGTATGCA	AGATCGGAAGAGCGTCGTGTAGGGGAAAGAG
1686	GACTGGAGTTCAGACGTGTGCTCTTCCGATCT	AATGTCCGTGAC	CATAGGCCACTAGTGGATCTGATATCACCTAATAACTTCGTATAGCATACATTATACGAAGTTATATTAAGGGTTGTCGACCTGCAGCGTAC	GTACATACCGGT	AGATCGGAAGAGCGTCGTGTAGGGGAAAGAG
1688	GACTGGAGTTCAGACGTGTGCTCTTCCGATCT	AATGTCCGTGAC	CATAGGCCACTAGTGGATCTGATATCACCTAATAACTTCGTATAGCATACATTATACGAAGTTATATTAAGGGTTGTCGACCTGCAGCGTAC	AATCCGTACAGC	AGATCGGAAGAGCGTCGTG-AGGGGAAAGAG
1706	GACTGGAGTTCAGACGTGTGCTCTTCCGATCT	ACCACATACATC	CATAGGCCACTAGTGGATCTGATATCACCTAATAACTTCGTATAGCATACATTATACGAAGTTATATTAAGGGTTGTCGACCTGCAGCGTAC	GTACATACCGGT	AGATCGGAAGAGCGTCGTGTAGGGGAAAGAG
1709	GACTGGAGTTCAGACGTGTGCTCTTCCGATCT	TACTTCGCTCGC	CATAGGCCACTAGTGGATCTGATATCACCTAATAACTTCGTATAGCATACATTATACGAAGTTATATTAAGGGTTGTCGACCTGCAGCGTAC	AATCCGTACAGC	AGATCGGAAGAGCGTCGTGTAGGGGAAAGAG
1712	GACTGGAGTTCAGACGTGTGCTCTTCCGATCT	GCTTCGGTAGAT	CATAGGCCACTAGTGGATCTGATATCACCTAATAACTTCGTATAGCATACATTATACGAAGTTATATTAAGGGTTGTCGACCTGCAGCGTAC	AATCCGTACAGC	AGATCGGAAGAGCGTCGTGTAGGGGAAAGAG
1716	GACTGGAGTTCAGACGTGTGCTCTTCCGATCT	TGACCTCCAAG-	CATAGGCCACTAGTGGATCTGATATCACCTAATAACTTCGTATAGCATACATTATACGAAGTTATATTAAGGGTTGTCGACCTGCAGCGTAC	ACACCTGGTGAT	AGATCGGAAGAGCGTCGTGTAGGGGAAAGAG
1722	GACTGGAGTTCAGACGTGTGCTCTTCCGATCT	ACGAGGAGGTGA	CACAGGCCACTAGTGGATCTGATATCACCTAATAACTTCGTATAGCATACATTATACGAAGTTATATTAAGGGTTGTCGACCTGCAGCGTAC	ACACCTGGTGAT	AGATCGGAAGAGCGTCGTGTAGGGGAAAGAG
1729	GACTGGAGTTCAGACGTGTGCTCTTCCGATCT	ACAAGGAGGTGG	CATAGGCCACTAGTGGATCTGATATCACCTAATAACTTCGTATAGCATACATTATACGAAGTTATATTAAGGGTTGTCGACCTGCAGCGTAC	TTACTGTGCGAT	AGATCGGAAGAGCGTCGTGTAGGGGAAAGAG
1736	GACTGGAGTTCAGACGTGTACTCTTCCGATCT	TACTTCGCTCGC	CATAGGCCACTAGTGGATCTGATATCACCTAATAACTTCGTATAGCATACATTATACGAAGTTATATTAAGGGTTGTCGACCTGCAGCGTAC	GTACATACCGGT	AGATCGGAAGAGCGTCGTGTAGGGGAAAGAG
1742	GACTGGAGTTCAGACGTGTGCTCTTCCGATCT	CTTACACCAAGT	CATAGGCCACTAGTGGATCTGATATCACCTAATAACTTCGTATAGCATACATTATACGAAGTTATATTAAGGGTTGTCGACCTGCAGCGTAC	GGAGACAAGGGA	AGATCGGAAGAGCGTCGTGTAGGGGAAAGAG
1756	GACTGGAGTTCAGACGTGTGCTCTTCCGATCT	AATGTCCGTGAC	CATAGGCCACTAGTGGATCTGATATCACCTAATAACTTCGTATAGCATACATTATACGAAGTTATATTAAGGGTTGTCGACCTGCAGCGTAC	TATCGTTGACCA	AGATCGGAAGAGCGTCGTGTAGGGGAAAGAG
1757	GACTGGAGTTCAGACGTGTGCTCTTCCGATCT	AATGTCCGTGAC	CATAGGCCACTAGTGGATCTGATATCACCTAATAACTTCGTATAGCATACATTATACGAAGTTATATTAAGGGTTGTCGACCTGCAGCGTAC	AGGCTACACGAC	AGATCGGAAGAGCGTCGTGTAGGGGAAAGAG
1758	GACTGGAGTTCAGACGTGTGCTCTTCCGATCT	TACTTCGCTCGC	CATAGGCCACTAGTGGATCTGATATCACCTAATAACTTCGTATAGCATACATTATACGAAGTTATATTAAGGGTTGTCGACCTGCAGCGTGC	AGGCTACACGAC	AGATCGGAAGAGCGTCGTGTAGGGGAAAGAG
1759	GACTGGAGTTCAGACGTGTGCTCTTCCGATCT	GCTTCGGTAGAT	CATAGGCCACTAGTGGATCTGATATCACCTAATAACTTCGTATAGCATACATTATACGAAGTTATATTAAGGGTTGTCGACCTGCAGCGTAC	AGGCTACACGAC	AGATCGGAAGAGCGTCGTGTA-GGGAAAGAG
1760	GACTGGAGTTCAGACGTGTGCTCTTCCGATCT	AACACAAGGAGT	CCTAGGCCACTAGTGGATCTGATATCACCTAATAACTTCGTATAGCATACATTATACGAAGTTATATTAAGGGTTGTCGACCTGCAGCGTAC	GTACATACCGGT	AGATCGGAAGAGCGTCGTGTAGGGGAAAGAG
1776	GACTGGAGTTCAGACGTGTGCTCTTCCGATCT	CTTACACCAAGT	CATAGGCCACTAGTGGATCTGATATCACCTAATAACTTCGTATAGCATACATTATACGAAGTTATATTAAGGGTTGTCGACCTGCAGCGTAC	AATCCGTACAGC	AGATCGGAAGAGCGTCGTGTAGGGGAAAGAG
1778	GACTGGAGTTCAGACGTGTGCTCTTCCGATCT	TACTTCGCTCGC	CATAGGCCACTAGTGGATCTGATATCACCTAATAACTTCGTATAGCATACATTATACGAAGTTATATTAAGGGTTGTCGACCTGCAGCGTAC	TATCGTTGACCA	AGATCGGAAGAGCGTCGTGTAGGGGAAAGAG
1781	GACTGGAGTTCAGACGTGTGCTCTTCCGATCT	ACAAGGAGGTGA	CATAGGCCACTAGTGGATCTGATATCACCTAATAACTTCGTATAGCATACATTATACGAAGTTATATTAAGGGTTGTCGACCTGCAGCGTAC	GAACCAAAGGAT	AGATCGGAAGAGCGTCGTGTAGGGGAAAGAG
1787	GACTGGAGTTCAGACGTGTGCTCTTCCGATCT	GCTTCGGTAGAT	CATAGGCCACTAGTGGATCTGATATCACCTAATAACTTCGTATAGCATACATTATACGAAGTTATATTAAGGGTTGTCGACCTGCAGCGTAC	GTACATACCGG-	AGATCGGAAGAGCGTCGTGTAGGGGAAAGAG
1795	GACTGGAGTTCAGACGTGTGCTCTTCCGATCT	GCTTCGGTAGAT	CATAGGCCACTAGTGGATCTGATATCATCTAATAACTTCGTATAGCATACATTATACGAAGTTATATTAAGGGTTGTCGACCTGCAGCGTAC	TATCGTTGACCA	AGATCGGAAGAGCGTCGTGTAGGGGAAAGAG
1796	GACTGGAGTTCAGACGTGTGCTCTTCCGATCT	CTTACACCAAGT	CATAGGCCACTAGTGGATCTGATATCACCTAATAACTTCGTATAGCATACATTATACGAAGTTATATTAAGGGTTGTCGACCTGCAGCGTAC	GTACATACCGGT	AGATCGGAAGAGCGTCGTGTAGGGGAAAGAG
1833	GACTGGAGTTCAGACGTGTGCTCTTCCGATCT	TACTTCGCTCGC	CATAGGCCATTAGTGGATCTGATATCACCTAATAACTTCGTATAGCATACATTATACGAAGTTATATTAAGGGTTGTCGACCTGCAGCGTAC	TCCGACACAATT	AGATCGGAAGAGCGTCGTG-AGGGGAAAGAG
1910	GACTGGAGTTCAGACGTGTGCTCTTCCGATCT	TGACCTCCAAGA	CATAGGCCACTAGTGGATCTGATATCACCTAATAACTTCGTATAGCATACATTATACGAAGTTATATTAAGGGTTGTCGACCTGCAGCGTAC	GTACATACCGGT	AGATCGGAAGAGCGTCGTGTAGGGGAAAGAG
1918	GACTGGAGTTCAGACGTGTGCTCTTCCGATCT	GCTTCGGTAGAT	CATAGGCCACTAGTGGATCTGATATCACCTAATAACTTCGTACAGCATACATTATACGAAGTTATATTAAGGGTTGTCGACCTGCAGCGTAC	TCCGACACAATT	AGATCGGAAGAGCGTCGTGTAGGGGAAAGAG
2013	GACTGGAGTTCAGACGTGTGCTCTTCCGATCT	CTTACACCAAGT	CATAGGCCACTAGTGGATCTGATATCACCTAATAACTTCGTATAGCATACATTATACGAAGTTATATTAAGGGTTGTCGACCTGCAGCGTAC	TATCGTTGACCA	AGATCGGAAGAGCGTCGTGTAGGGGAAAGAG
2077	GACTGGAGTTCAGACGTGTGCTCTTCCGATCT	CTTACACCAAGT	CATAGGCCACTAGTGGATCTGATATCACCTAATAACTTCGTATAGCATACATTATACGAAGTTATATTAAGGGTTGTCGACCTGCAGCGTAC	TCCGACACAATT	AGATCGGAAGAGCGTCGTGTAGGGGAAAGAG
2078	GACTGGAGTTCAGACGTGTGCTCTTCCGATCT	GCTTCGGTAGAT	CATAGGCCACTAGTGGATCTGATATCACCTAATAACTTCGTATAGCATACATTATACGAAGTTATATTAAGGGTTGTCGACCTGCAGCGTAC	GTATGCGCTGTA	AGATCGGAAGAGCGTCGTGTAGGGGAAAGAG
2079	GACTGGAGTTCAGACGTGTGCTCTTCCGATCT	CTTACACCAAGT	CATAGGCCACTAGTGGATCTGATATCACCTAATAACTTCGTATAGCATACATTATACGAAGTTATATTAAGGGTTGTCGACCTGCAGCGTAC	GTATGCGCTGTA	AGATCGGAAGAGCGTCGTGTAGGGGAAAGAG
2255	GACTGGAGTTCAGACGTGTGCTCTTCCGATCT	TACTTCGCTCGC	CATAGGCCACTAGTGGATCTGATATCACCTAATAACTTCGTATAGCATACATTATACGAAGTTATATTAAGGGTTGTCGACCTGCAGCGTAC	CTAACCTCCGCT	AGATCGGAAGAGCGTCGTGTAGGGGAAAGAG
2260	GACTGGAGTTCAGACGTGTGCTCTTCCGATCT	TGACCTCCAAGA	CATAGGCCACTAGTGGATCTGATATCACCTAATAACTTCGTATAGCATACATTATACGAAGTTATATTAAGGGTTGTCGACCTGCAGCGTAC	GTATGCGCTGTA	AGATCGGAAGAGCGTCGTGTAGGGGAAAGAG
2308	GACTGGAGTTCAGACGTGTGCTCTTCCGATCT	TACTTCGCTCGC	CATAGGCCACTAGTGGATCTGATATCACCTAATAACTTCGTACAGCATACATTATACGAAGTTATATTAAGGGTTGTCGACCTGCAGCGTAC	GTATGCGCTGTA	AGATCGGAAGAGCGTCGTGTAGGGGAAAGAG
2776	GACTGGAGTTCAGACGTGTGCTCTTCCGATCT	ACAAGGAGGTGA	CATAGGCCACTAGTGGATCTGATATCACCTAATAACTTCGTATAGCATACATTATACGAAGTTATATTAAGGGTTGTCGACCTGCAG-GTAC	GTACATACCGGT	AGATCGGAAGAGCGTCGTGTAGGGGAAAGAG
2851	GACTGGAGTTCAGACGTGTGCTCTTCCGATCT	AACACAAGGAGT	CATAGGCCACTAGTGGATCTGATATCACCTAATAACTTCGTATAGCATACATTATACGAAGTTATATTAAGGGTTGTCGACCTGCAGCGTAC	AATCAGTCTCGT	AGATCGGAAGAGCGTCGTGTAGGGGAAAGAG
2852	GACTGGAGTTCAGACGTGTGCTCTTCCGATCT	ACAAGGAGGTGA	CATAGGCCACTAGTGGATCTGATATCACCTAATAACTTCGTATAGCATACATTATACGAAGTTATATTAAGGGTTGTCGACCTGCAGCGTAC	TCCGACACAATT	AGATCGGAAGAGCGTCGTGTAGGGGAAAGAG
2858	GACTGGAGTTCAGACGTGTGCTCTTCCGATCT	AATGTCCGTGAC	CATAGGCCACTAGTGGATCTGATATCACCTAATAACTTCGTATAGCATACATTATACGAAGTTATATTAAGGGTTGTCGACCTGCAGCGTAC	AATCAGTCTCGT	AGATCGGAAGAGCGTCGTGTAGGGGAAAGAG
2861	GACTGGAGTTCAGACGTGTGCTCTTCCGATCT	TACTTCGCTCGC	CATAGGCCACTAGTGGATCTGATATCACCTAATAACTTCGTATAGCATACATTATACGAAGTTATATTAAGGGTTGTCGACCTGCAGCGTAC	AATCAGTCTCGT	AGATCGGAAGAGCGTCGTGTAGGGGAAAGAG
2863	GACTGGAGTTCAGACGTGTGCTCTTCCGATCT	ACAAGGAGGTGA	CATAGGCCACTAGTGGATCTGATATCACCTAATAACTTCGTATAGCATACATTATACGAAGTTATATTAAGGGTTGTCGACCTGTAGCGTAC	GGAGACAAGGGA	AGATCGGAAGAGCGTCGTGTAGGGGAAAGAG
2865	GACTGGAGTTCAGACGTGTGCTCTTCCGATCT	TGACCTCCAAGA	CATAGGCCACTAGTGGATCTGATATCACCTAATAACTTCGTATAGCATACATTATACGAAGTTATATTAAGGGTTGTCGACCTGCAGCGTAC	AATCGGTACAGC	AGATCGGAAGAGCGTCGTGTAGGGGAAAGAG
2866	GACTGGAGTTCAGACGTGTGCTCTTCCGATCT	TGACCTCCAAGA	CATAGGCCACTAGTGGATCTGATATCACCTAATAACTTCGTATAGCATACATTATACGAAGTTATATTAAGGGTTGTCGACCTGCAGCGTAC	GGAGACAAGGGA	AGATCGGAAGAGCGTCGTGTAGGGGAAAGAG
2867	GACTGGAGTCCAGACGTGTGCTCTTCCGATCT	GCTTCGGTAGAT	CATAGGCCACTAGTGGATCTGATATCACCTAATAACTTCGTATAGCATACATTATACGAAGTTATATTAAGGGTTGTCGACCTGCAGCGTAC	AATCAGTCTCGT	AGATCGGAAGAGCGTCGTGTAGGGGAAAGAG
2874	GACTGGAGTTCAGACGTGTGCTCTTCCGATCT	ACAAGGAGGTGA	CATAGGTCACTAGTGGATCTGATATCACCTAATAACTTCGTATAGCATACATTATACGAAGTTATATTAAGGGTTGTCGACCTGCAGCGTAC	AATCCGTACAGC	AGATCGGAAGAGCGTCGTGTAGGGGAAAGAG
2878	GACTGGAGTTCAGACGTGTGCTCTTCCGATCT	CTTACACCAAGT	CATAGGCCACTAGTGGATCTGATATCACCTAATAACTTCGTATAGCATACATTATACGAAGTTATATTAAGGGTTGTCGACCTGCAGCGTAC	AATCAGTCTCGT	AGATCGGAAGAGCGTCGTGTAGGGGAAAGAG
2880	GACTGGAGTTCAGACGTGTGCTCTTCCGATCT	TGACCTCCAAGA	CATAGGCCACTAGTGGATCTGATATCACCTAATAACTTCGTATAGCATACATTATACGAAGTTATATTAAGGGTTGTCGACCTGCAGCGTAC	AATCAGTCTCGT	AGATCGGAAGAGCGTCGTGTAGGGGAAAGAG
2881	GACTGGAGTTCAGACGTGTGCTCTTCCGATCT	ACAAGGAGGTGA	CATAGGCCACTAGTGGATCTGATATCACCTAATAACTTCGTATAGCATACATTATACGAAGTTATATTAAGGGTTGTCGACCTGCAGCGTAC	AATCAGTCTCGT	AGATCGGAAGAGCGTCGTGTAGGGGAAAGAG
2910	GACTGGAGTTCAGACGTGTGCTCTTCCGATCT	GCTTCGGTAGAT	CATAGGCCACTAGTGGATCTGATATCACCTAATAACTTCGTATAGCATACATTATACGAAGTTATATTAAGGGTTGTCGACCTGCAGCGTAC	TTACTGTGCGAT	AGATCGGAAGAGCGTCGTGTAGGGGAAAGAG
2913	GACTGGAGTTCAGACGTGTGCTCTTCCGATCT	CTTACACCAAGT	CATAGGCCACTAGTGGATCTGATATCACCTAATAACTTCGTATAGCATACATTATACGAAGTCATATTAAGGGTTGTCGACCTGCAGCGTAC	CCAGTGTATGCA	AGATCGGAAGAGCGTCGTGTAGGGGAAAGAG
2914	GACTGGAGTTCAGACGTGTGCTCTTCCGATCT	AATGTCCGTGAC	CATAGGCCACTAGTGGATCTGATATCACCTAATAACTTCGTATAGCATACATTATACGAAGTTATATTAAGGGTTGTCGACCTGCAGCGTAC	GTATGCGCTGTA	AGATCGGAAGAGCGTCGTGTAGGGGAAAGAG

## Sheet: T4_Strain_OD600
Strain identifier and absorbance at 600nm of cultures prior to pooling
AWRI number (source)	abs_600nm
81	4.72
170	4.62
213	2.98
228	5.78
266	5.68
722	4.5
724	4.58
735	4.26
739	6.08
740	4.5
763	3.98
778	4.14
793	4.82
796	6.4
833	5.66
838	4.54
896	5.78
934	4.18
935	3.24
947	3.88
1001	4.08
1017	4.64
1082	4.94
1427	4.2
1429	4.28
1430	2.72
1432	3.7
1436	4.44
1482	4.56
1483	4.72
1485	4.62
1486	5.04
1487	5.46
1488	6.22
1490	5.18
1491	4.98
1493	5.32
1497	5.22
1501	4.64
1502	4.86
1503	3.82
1504	5.84
1505	3.7
1537	5.1
1688	4.44
1706	5.52
1709	4.28
1712	5.42
1716	4.78
1722	6.02
1729	7.3
1736	4.2
1742	4.74
1756	4.62
1757	6.28
1758	5.1
1759	4.92
1760	5.92
1776	3.9
1778	7.42
1781	5.68
1787	4.64
1795	6.08
1796	4.56
1833	3.8
1910	4.62
1918	4.88
2013	5.2
2078	5.18
2079	4.74
2255	6.26
2260	4.66
2308	4.92
2776	6.46
2851	4.42
2852	4.58
2858	5.4
2861	4.88
2863	4.94
2865	4.44
2866	5.34
2867	4.78
2874	6.28
2878	4.76
2880	5.38
2881	5.68
2910	5.4
2913	5.68
2914	4.58

## Sheet: T5_Treatment_summary
List of batch ID, contrats name, the reference condition that was used to build the contrast, the column label for the contrast used in construction of figure 4 of the manuscript, a description of the treatment and a table used to build that contrast balloon plot below figure 4.
batch ID	contrast ID	reference ID	col.label	treatment description	reference	high.copper	high.S02	high.potassium	low.potassium	high.sugar	low.nitrogen	high.nitrogen	low.pH	low.temp	high.temp	no.biotin	low.biotin	no.thiamin	low.thiamin	no.pantothenate	low sodium	juice
L1	DM	DM.1	DM_L1	defined medium	1	0	0	0	0	0	0	0	0	0	0	0	0	0	0	0	0	0
L1	HCu	DM.3	HC_L1	10 mg/L copper	0	1	0	0	0	0	0	0	0	0	0	0	0	0	0	0	0	0
L1	HK	DM.3	HK_L1	1400 mg/L Potassium	0	0	0	1	0	0	0	0	0	0	0	0	0	0	0	0	0	0
L1	HS	DM.3	HS_L1	280 g/L Reducing sugars	0	0	0	0	0	1	0	0	0	0	0	0	0	0	0	0	0	0
L1	HS.LYAN	DM.3	HS.LYAN_L1	280 g/L Reducing sugars + 150 mg/L YAN	0	0	0	0	0	1	1	0	0	0	0	0	0	0	0	0	0	0
L1	LpH	DM.3	LpH_L1	pH 3.0	0	0	0	0	0	0	0	0	1	0	0	0	0	0	0	0	0.4	0
L1	LpH.HK	DM.3	LPH.HK_L1	pH 3.0 + 1400 mg/L Potassium	0	0	0	1	0	0	0	0	1	0	0	0	0	0	0	0	0.4	0
L1	LYAN	DM.3	LYAN_L1	150 mg/L YAN	0	0	0	0	0	0	1	0	0	0	0	0	0	0	0	0	0	0
L2	DM	DM.1	DM_L2	defined medium	1	0	0	0	0	0	0	0	0	0	0	0	0	0	0	0	0	0
L2	HCu	DM.3	HCu_L2	10 mg/L copper	0	1	0	0	0	0	0	0	0	0	0	0	0	0	0	0	0	0
L2	HCu.HK	DM.3	HCu.HK_L2	10 mg/L copper + 1400 mg/L Potassium	0	1	0	1	0	0	0	0	0	0	0	0	0	0	0	0	0	0
L2	HK	DM.3	HK_L2	1400 mg/L Potassium	0	0	0	1	0	0	0	0	0	0	0	0	0	0	0	0	0	0
L2	LpH	DM.3	LpH_L2	pH 3.0	0	0	0	0	0	0	0	0	1	0	0	0	0	0	0	0	0.4	0
L2	LpH.HCu	DM.3	LpH.HCu_L2	pH 3.0 + 10 mg/L copper	0	1	0	0	0	0	0	0	1	0	0	0	0	0	0	0	0.4	0
L2	LpH.HCu.HK	DM.3	LpH.HCu.HK_L2	pH 3.0 + 10 mg/L copper + 1400 mg/L Potassium	0	1	0	1	0	0	0	0	1	0	0	0	0	0	0	0	0.4	0
L2	LpH.HK	DM.3	LpH.HK_L2	pH 3.0 + 1400 mg/L Potassium	0	0	0	1	0	0	0	0	1	0	0	0	0	0	0	0	0.4	0
L4	DM	DM.1	DM_L4	defined medium	1	0	0	0	0	0	0	0	0	0	0	0	0	0	0	0	0	0
L4	HS.Temp12	DM.3	HS.Temp12_L4	280 g/L Reducing sugars + 12°C	0	0	0	0	0	1	0	0	0	1	0	0	0	0	0	0	0	0
L4	HS.Temp18	DM.3	HS.Temp18_L4	280 g/L Reducing sugars + 18°C	0	0	0	0	0	1	0	0	0	0	0	0	0	0	0	0	0	0
L4	HS.Temp28	DM.3	HS.Temp28_L4	280 g/L Reducing sugars + 28°C	0	0	0	0	0	1	0	0	0	0	1	0	0	0	0	0	0	0
L4	Temp12	DM.3	Temp12_L4	12°C	0	0	0	0	0	0	0	0	0	1	0	0	0	0	0	0	0	0
L4	Temp28	DM.3	Temp28_L4	28°C	0	0	0	0	0	0	0	0	0	0	1	0	0	0	0	0	0	0
L5	Biot0-1	DM.3	Biot0-1_L5	0.1 μg/L biotin	0	0	0	0	0	0	0	0	0	0	0	0	1	0	0	0	0	0
L5	DM	DM.1	DM_L5	defined medium	1	0	0	0	0	0	0	0	0	0	0	0	0	0	0	0	0	0
L5	noBiot	DM.3	noBiot_L5	no biotin	0	0	0	0	0	0	0	0	0	0	0	1	0	0	0	0	0	0
L5	noPanto	DM.3	noPanto_L5	no pantothenate	0	0	0	0	0	0	0	0	0	0	0	0	0	0	0	1	0	0
L5	noPanto.noThia	DM.3	noPanto.noThia_L5	no pantothenate + no thiamine	0	0	0	0	0	0	0	0	0	0	0	0	0	1	0	1	0	0
L5	noThia	DM.3	noThia_L5	no thiamin	0	0	0	0	0	0	0	0	0	0	0	0	0	1	0	0	0	0
L5	noVit	DM.3	noVit_L5	no vitamins	0	0	0	0	0	0	0	0	0	0	0	1	0	1	0	1	0	0
L5	Thia10	DM.3	Thia10_L5	10 μg/L thiamin	0	0	0	0	0	0	0	0	0	0	0	0	0	0	1	0	0	0
L6	Biot0-1	DM.3	Biot0-1_L6	0.1 μg/L biotin	0	0	0	0	0	0	0	0	0	0	0	0	1	0	0	0	0	0
L6	DM	DM.1	DM_L6	defined medium	1	0	0	0	0	0	0	0	0	0	0	0	0	0	0	0	0	0
L6	HCu	DM.3	HCu_L6	10 mg/L copper	0	1	0	0	0	0	0	0	0	0	0	0	0	0	0	0	0	0
L6	HCu.Biot0-1	DM.3	HCu.Biot0-1_L6	10 mg/L copper + 0.1 μg/L biotin	0	1	0	0	0	0	0	0	0	0	0	0	1	0	0	0	0	0
L6	LpH	DM.3	LpH_L6	pH 3.0	0	0	0	0	1	0	0	0	1	0	0	0	0	0	0	0	0.4	0
L6	LpH.Biot0-1	DM.3	LpH.Biot0-1_L6	pH 3.0 + 0.1 μg/L biotin	0	0	0	0	1	0	0	0	1	0	0	0	1	0	0	0	0.4	0
L6	LpH.HCu	DM.3	LpH.HCu_L6	pH 3.0 + 10 mg/L copper	0	1	0	0	1	0	0	0	1	0	0	0	0	0	0	0	0.4	0
L6	LpH.HCu.Biot0-1	DM.3	LpH.HCu.Biot0-1_L6	pH 3.0 + 10 mg/L copper + 0.1 μg/L biotin	0	1	0	0	1	0	0	0	1	0	0	0	1	0	0	0	0.4	0
L7	ChardWB	ChardWB.1	ChardWB_L7	Chardonnay	0	0	0	0	0	0	0	0	0	0	0	0	0	0	0	0	0	0
L7	HS	ChardWB.2	HS_L7	280 g/L Reducing sugars	0	0	0	0	0	1	0	0	0	0	0	0	0	0	0	0	0	0
L7	HS.HSO2	ChardWB.2	HS.HSO2_L7	Chardonnay + 270 g/L reducing sugars + 20 mg/L free SO2	0	0	1	0	0	1	0	0	0	0	0	0	0	0	0	0	0	0
L7	HS.HSO2.HYAN	ChardWB.2	HS.HSO2.HYAN_L7	Chardonnay + 270 mg/L reducing sugars + 380 mg/L YAN + 20 mg/L Free SO2	0	0	1	0	0	1	0	1	0	0	0	0	0	0	0	0	0	0
L7	HS.HYAN	ChardWB.2	HS.HYAN_L7	Chardonnay + 270 g/L reducing sugars + 380 mg/L YAN	0	0	0	0	0	1	0	1	0	0	0	0	0	0	0	0	0	0
L7	HSO2	ChardWB.2	HSO2_L7	Chardonnay + 20 mg/L free SO2	0	0	1	0	0	0	0	0	0	0	0	0	0	0	0	0	0	0
L7	HSO2.HYAN	ChardWB.2	HSO2.HYAN_L7	Chardonnay + 20 mg/L free SO2 + 380 mg/L YAN	0	0	1	0	0	0	0	1	0	0	0	0	0	0	0	0	0	0
L7	HYAN	ChardWB.2	HYAN_L7	Chardonnay + 380 mg/L YAN	0	0	0	0	0	0	0	1	0	0	0	0	0	0	0	0	0	0
L8	ChardBR	DM.2	ChardBR_L8	Chardonnay_2	0	0	0.14	0	0.27	0.16	0.93	0	0	0	0	0	0	0	0	0	1	1
L8	ChardRF	DM.2	ChardRF_L8	Chardonnay_1	0	0	0.37	0	0.41	0.25	0.25	0	0.26	0	0	0	0	0	0	0	1	1
L8	DM	DM.1	DM_L8	defined medium	1	0	0	0	0	0	0	0	0	0	0	0	0	0	0	0	0	0
L8	PinotgY	DM.2	PinotgY_L8	Pinot gris	0	0	0.09	0	0.79	1	0.33	0	0.6	0	0	0	0	0	0	0	1	1
L8	RiesEV	DM.2	RiesEV_L8	Riesling	0	0	0.2	0	0.72	0	0.69	0	0.6	0	0	0	0	0	0	0	1	1
L8	RiesWB	DM.2	RiesWB_L8	Riesling	0	0	0.97	0	0.59	0.17	1	0	1	0	0	0	0	0	0	0	1	1
L8	SauvbWB	DM.2	SauvbWB_L8	Sauvignon blanc	0	0	1	0	1	0.29	0.66	0	0.9	0	0	0	0	0	0	0	1	1

## Sheet: T6_Media_composition
Measured concentrations of variables used in all medium conditions, either reference or treatment conditions. The methods used for the determination of medium components is lited in the manuscript text. ND = not determined. Vitamin concentrations given for defined medium is based on addition rates and were not determined by direct measurement.
	units	DM_L1	HCu_L1	HK_L1	HS_L1	HS.LYAN_L1	LpH_L1	LPH.HK_L1	LYAN_L1	DM_L2	HCu_L2	HCu.HK_L2	HK_L2	LpH_L2	LpH.HCu_L2	LpH.HCu.HK_L2	LpH.HK_L2	DM_L4	HS.Temp12_L4	HS.Temp18_L4	HS.Temp28_L4	Temp12_L4	Temp28_L4	Biot0-1_L5	DM_L5	noBiot_L5	noPanto_L5	noPanto.noThia_L5	noThia_L5	noVit_L5	Thia10_L5	Biot0-1_L6	DM_L6	HCu_L6	HCu.Biot0-1_L6	LpH_L6	LpH.Biot0-1_L6	LpH.HCu_L6	LpH.HCu.Biot0-1_L6	ChardWB_L7	HS_L7	HS.HSO2_L7	HS.HSO2.HYAN_L7	HS.HYAN_L7	HSO2_L7	HSO2.HYAN_L7	HYAN_L7	ChardBR_L8	ChardRF_L8
pH		3.5	3.5	3.5	3.5	3.5	3	3	3.5	3.5	3.5	3.5	3.5	3	3	3	3	3.5	3.5	3.5	3.5	3.5	3.5	3.5	3.5	3.5	3.5	3.5	3.5	3.5	3.5	3.5	3.5	3.5	3.5	3	3	3	3	3.25	3.25	3.25	3.25	3.25	3.25	3.25	3.25	3.6	3.34
TA pH 8.2		4.8	4.8	4.8	4.8	4.8	4.8	4.8	4.8	4.8	4.8	4.8	4.8	4.8	4.8	4.8	4.8	4.8	4.8	4.8	4.8	4.8	4.8	4.8	4.8	4.8	4.8	4.8	4.8	4.8	4.8	4.8	4.8	4.8	4.8	4.8	4.8	4.8	4.8	6.4	6.4	6.4	6.4	6.4	6.4	6.4	6.4	4	7.4
estimated molecular SO2*	mg/L	0	0	0	0	0	0	0	0	0	0	0	0	0	0	0	0	0	0	0	0	0	0	0	0	0	0	0	0	0	0	0	0	0	0	0	0	0	0	0.21	0.21	0.65	0.65	0.21	0.65	0.65	0.21	0.07	0.16
SO2 free	mg/L	0	0	0	0	0	0	0	0	0	0	0	0	0	0	0	0	0	0	0	0	0	0	0	0	0	0	0	0	0	0	0	0	0	0	0	0	0	0	6	6	19	19	6	19	19	6	<5	6
SO2 total	mg/L	0	0	0	0	0	0	0	0	0	0	0	0	0	0	0	0	0	0	0	0	0	0	0	0	0	0	0	0	0	0	0	0	0	0	0	0	0	0	33	33	56	56	33	56	56	33	24	52
Glucose + Fructose	g/L	200	200	200	280	280	200	200	200	200	200	200	200	200	200	200	200	200	280	280	280	200	200	200	200	200	200	200	200	200	200	200	200	200	200	200	200	200	200	200	280	280	280	280	200	200	200	223	236
YAN	mgN/L	400	400	400	400	150	400	400	150	400	400	400	400	400	400	400	400	400	400	400	400	400	400	400	400	400	400	400	400	400	400	400	400	400	400	400	400	400	400	200	200	200	345	345	200	345	345	170	338
Calcium	mg/L	42.7	42.7	42.7	42.7	42.7	42.7	42.7	42.7	42.7	42.7	42.7	42.7	42.7	42.7	42.7	42.7	42.7	42.7	42.7	42.7	42.7	42.7	42.7	42.7	42.7	42.7	42.7	42.7	42.7	42.7	42.7	42.7	42.7	42.7	42.7	42.7	42.7	42.7	68	68	68	68	68	68	68	68	144	113
Copper	mg/L	0.035	10	0.035	0.035	0.035	0.035	0.035	0.035	0.035	10	10	0.035	0.035	10	10	0.035	0.035	0.035	0.035	0.035	0.035	0.035	0.035	0.035	0.035	0.035	0.035	0.035	0.035	0.035	0.035	0.035	10	10	0.035	0.035	10	10	0.6	0.6	0.6	0.6	0.6	0.6	0.6	0.6	4.1	0.9
Iron	mg/L	0.028	0.028	0.028	0.028	0.028	0.028	0.028	0.028	0.028	0.028	0.028	0.028	0.028	0.028	0.028	0.028	0.028	0.028	0.028	0.028	0.028	0.028	0.028	0.028	0.028	0.028	0.028	0.028	0.028	0.028	0.028	0.028	0.028	0.028	0.028	0.028	0.028	0.028	<0.3	<0.4	<0.5	<0.6	<0.7	<0.8	<0.9	<0.10	0.4	<0.3
Magnesium	mg/L	58.6	58.6	58.6	58.6	58.6	58.6	58.6	58.6	58.6	58.6	58.6	58.6	58.6	58.6	58.6	58.6	58.6	58.6	58.6	58.6	58.6	58.6	58.6	58.6	58.6	58.6	58.6	58.6	58.6	58.6	58.6	58.6	58.6	58.6	58.6	58.6	58.6	58.6	71	71	71	71	71	71	71	71	128	108
Manganese	mg/L	0.353	0.353	0.353	0.353	0.353	0.353	0.353	0.353	0.353	0.353	0.353	0.353	0.353	0.353	0.353	0.353	0.353	0.353	0.353	0.353	0.353	0.353	0.353	0.353	0.353	0.353	0.353	0.353	0.353	0.353	0.353	0.353	0.353	0.353	0.353	0.353	0.353	0.353	0.4	0.4	0.4	0.4	0.4	0.4	0.4	0.4	0.8	1.8
Potassium	mg/L	170	170	1400	170	170	170	1400	170	170	170	1400	1400	170	170	1400	1400	170	170	170	170	170	170	1400	1400	1400	1400	1400	1400	1400	1400	1400	1400	1400	1400	170	170	170	170	629	629	629	629	629	629	629	629	1090	928
Sodium	mg/L	900	900	900	900	900	500	500	900	900	900	900	900	500	500	500	500	900	900	900	900	900	900	900	900	900	900	900	900	900	900	900	900	900	900	500	500	500	500	17	17	17	17	17	17	17	17	14	33
Zinc	mg/L	0.248	0.248	0.248	0.248	0.248	0.248	0.248	0.248	0.248	0.248	0.248	0.248	0.248	0.248	0.248	0.248	0.248	0.248	0.248	0.248	0.248	0.248	0.248	0.248	0.248	0.248	0.248	0.248	0.248	0.248	0.248	0.248	0.248	0.248	0.248	0.248	0.248	0.248	0.38	0.38	0.38	0.38	0.38	0.38	0.38	0.38	0.67	1.2
Thiamine HCl	mg/L	0.1	0.1	0.1	0.1	0.1	0.1	0.1	0.1	0.1	0.1	0.1	0.1	0.1	0.1	0.1	0.1	0.1	0.1	0.1	0.1	0.1	0.1	0.1	0.1	0.1	0.1	0	0	0	0.01	0.1	0.1	0.1	0.1	0.1	0.1	0.1	0.1	ND	ND	ND	ND	ND	ND	ND	ND	ND	ND
Riboflavin	mg/L	0.12	0.12	0.12	0.12	0.12	0.12	0.12	0.12	0.12	0.12	0.12	0.12	0.12	0.12	0.12	0.12	0.12	0.12	0.12	0.12	0.12	0.12	0.12	0.12	0.12	0.12	0	0.12	0	0.12	0.12	0.12	0.12	0.12	0.12	0.12	0.12	0.12	ND	ND	ND	ND	ND	ND	ND	ND	ND	ND
Pyridoxine	mg/L	0.1	0.1	0.1	0.1	0.1	0.1	0.1	0.1	0.1	0.1	0.1	0.1	0.1	0.1	0.1	0.1	0.1	0.1	0.1	0.1	0.1	0.1	0.1	0.1	0.1	0.1	0	0.1	0	0.1	0.1	0.1	0.1	0.1	0.1	0.1	0.1	0.1	ND	ND	ND	ND	ND	ND	ND	ND	ND	ND
Calcium D-pantothenate	mg/L	0.25	0.25	0.25	0.25	0.25	0.25	0.25	0.25	0.25	0.25	0.25	0.25	0.25	0.25	0.25	0.25	0.25	0.25	0.25	0.25	0.25	0.25	0.25	0.25	0.25	0	0	0.25	0	0.25	0.25	0.25	0.25	0.25	0.25	0.25	0.25	0.25	ND	ND	ND	ND	ND	ND	ND	ND	ND	ND
Nicotinic acid	mg/L	0.3	0.3	0.3	0.3	0.3	0.3	0.3	0.3	0.3	0.3	0.3	0.3	0.3	0.3	0.3	0.3	0.3	0.3	0.3	0.3	0.3	0.3	0.3	0.3	0.3	0.3	0	0.3	0	0.3	0.3	0.3	0.3	0.3	0.3	0.3	0.3	0.3	ND	ND	ND	ND	ND	ND	ND	ND	ND	ND
Myo - Inositol	mg/L	10	10	10	10	10	10	10	10	10	10	10	10	10	10	10	10	10	10	10	10	10	10	10	10	10	10	10	10	10	10	10	10	10	10	10	10	10	10	ND	ND	ND	ND	ND	ND	ND	ND	ND	ND
Biotin	mg/L	0.005	0.005	0.005	0.005	0.005	0.005	0.005	0.005	0.005	0.005	0.005	0.005	0.005	0.005	0.005	0.005	0.005	0.005	0.005	0.005	0.005	0.005	0.005	0.005	0	0.005	0.005	0.005	0	0.005	0.0001	0.005	0.005	0.0001	0.005	0.0001	0.005	0.0001	ND	ND	ND	ND	ND	ND	ND	ND	ND	ND
Folic acid	mg/L	0.05	0.05	0.05	0.05	0.05	0.05	0.05	0.05	0.05	0.05	0.05	0.05	0.05	0.05	0.05	0.05	0.05	0.05	0.05	0.05	0.05	0.05	0.05	0.05	0.05	0.05	0	0.05	0	0.05	0.05	0.05	0.05	0.05	0.05	0.05	0.05	0.05	ND	ND	ND	ND	ND	ND	ND	ND	ND	ND
4-amino benzoic acid	mg/L	0.015	0.015	0.015	0.015	0.015	0.015	0.015	0.015	0.015	0.015	0.015	0.015	0.015	0.015	0.015	0.015	0.015	0.015	0.015	0.015	0.015	0.015	0.015	0.015	0.015	0.015	0	0.015	0	0.015	0.015	0.015	0.015	0.015	0.015	0.015	0.015	0.015	ND	ND	ND	ND	ND	ND	ND	ND	ND	ND
[truncated: 5 more columns]

## Sheet: T7_analysis_summary
Output following analysis by edgeR of contrasts listed in T5. The contrast label is comprised of Batch ID + treatment ID + reference ID. The strain ID is given as the source strain from which the barcoded strain was derived. Log FC provides the log2 fold change for a strain in a contrast between the treatment and reference conditions. logCPM gives counts per million reads, F = the f statistic, FD…
contrast	strain ID	logFC	logCPM	F	PValue	FDR	sig	strain common name
L1_DM.3vsDM.1	81	-1.2822	9.95263	12.6555	0.000623109	0.0010219	-1	X81_Brelez
L1_DM.3vsDM.1	170	-3.46871	9.39183	73.2768	5.08571e-13	1.88838e-12	-1	Sep_1
L1_DM.3vsDM.1	213	-6.73066	7.93611	116.098	7.20587e-17	4.54524e-16	-1	Tintara_1953
L1_DM.3vsDM.1	228	1.2301	18.3341	25.04	3.11381e-06	5.55071e-06	1	Stoneyfell_1949
L1_DM.3vsDM.1	266	-5.61485	8.8149	102.51	3.86825e-16	1.98248e-15	-1	X266
L1_DM.3vsDM.1	722	-4.8596	10.096	130.5	2.21205e-18	2.26735e-17	-1	X722
L1_DM.3vsDM.1	724	-2.02262	9.77442	25.7113	2.38631e-06	4.34839e-06	-1	Bright_Tokay6
L1_DM.3vsDM.1	735	-4.96985	12.3862	210.663	1.87998e-24	7.2673e-23	-1	Beech_Wadenswil
L1_DM.3vsDM.1	740	-3.45735	9.66885	77.1902	2.62611e-13	1.07671e-12	-1	Trier_25
L1_DM.3vsDM.1	763	-4.88213	10.9029	143.474	9.35253e-20	1.27818e-18	-1	X763
L1_DM.3vsDM.1	778	-8.73676	10.7951	263.77	3.73858e-27	3.06564e-25	-1	X778
L1_DM.3vsDM.1	796	0.442768	19.7582	3.26276	0.0745077	0.0911885	0	X796
L1_DM.3vsDM.1	833	-6.06902	8.34981	112.395	8.01673e-17	4.6603e-16	-1	Penfolds_B
L1_DM.3vsDM.1	838	-1.03526	12.3976	32.744	1.63394e-07	3.40956e-07	-1	X838
L1_DM.3vsDM.1	896	-2.3484	10.1824	41.6778	6.93397e-09	1.67231e-08	-1	X896
L1_DM.3vsDM.1	934	0.29887	8.75086	0.550859	0.460122	0.496447	0	UCD_48.41
L1_DM.3vsDM.1	935	-10.196	8.17774	150.55	8.52493e-17	4.6603e-16	-1	UCD_C.9
L1_DM.3vsDM.1	947	0.00571637	12.9457	0.000368708	0.984726	0.99005	0	Beech_729
L1_DM.3vsDM.1	1001	-0.474413	15.141	8.22554	0.00523966	0.00781186	-1	Petaluma_1
L1_DM.3vsDM.1	1017	0.184648	12.6032	0.490761	0.485554	0.517084	0	Petaluma_2
L1_DM.3vsDM.1	1082	-3.74344	12.5499	132.593	7.28654e-19	8.53566e-18	-1	NCYC_761
L1_DM.3vsDM.1	1427	-8.844	6.96881	94.6686	5.29667e-13	1.88838e-12	-1	Lalvin_WSK.27
L1_DM.3vsDM.1	1429	-1.08889	11.9753	26.9157	1.48733e-06	2.77184e-06	-1	Lalvin_DV10
L1_DM.3vsDM.1	1432	1.0819	13.073	4.95276	0.0295067	0.0384055	1	Vin_7
L1_DM.3vsDM.1	1436	-2.03626	9.71238	32.6958	1.6632e-07	3.40956e-07	-1	Lalvin_S6U
L1_DM.3vsDM.1	1482	-8.97249	9.80313	226.192	2.65877e-24	7.2673e-23	-1	C_Todd_1
L1_DM.3vsDM.1	1483	-1.41758	14.5718	10.7888	0.00164379	0.00259213	-1	Lalvin_ICV_D254
L1_DM.3vsDM.1	1485	-1.78346	11.7833	17.1437	9.07516e-05	0.000155034	-1	Lalvin_RC212
L1_DM.3vsDM.1	1486	0.437413	13.3648	3.15874	0.0791985	0.0941199	0	Lalvin_BM45
L1_DM.3vsDM.1	1487	0.868558	13.8163	5.67408	0.0200073	0.02762	1	Lalvin_Rhone_L2056
L1_DM.3vsDM.1	1488	0.846551	15.6366	16.9958	8.86092e-05	0.000154595	1	Lalvin_ICV_D47
L1_DM.3vsDM.1	1490	0.591133	14.5327	1.51741	0.222428	0.253321	0	Lalvin_Rhone_L2323
L1_DM.3vsDM.1	1491	-5.74464	7.28014	67.185	6.18127e-12	1.87727e-11	-1	Uvaferm_BDX
L1_DM.3vsDM.1	1493	-4.5569	10.5591	116.886	3.18893e-17	2.1791e-16	-1	Lalvin_71B
L1_DM.3vsDM.1	1497	0.654078	14.5471	5.35835	0.0232393	0.0312397	1	Lalvin_T73
L1_DM.3vsDM.1	1502	-1.9099	12.0308	64.8144	5.27076e-12	1.66232e-11	-1	Fusion
L1_DM.3vsDM.1	1503	-1.33621	12.5564	28.4408	8.24229e-07	1.64846e-06	-1	X1503
L1_DM.3vsDM.1	1504	-1.87529	13.3239	74.3401	3.82625e-13	1.49406e-12	-1	X1504
L1_DM.3vsDM.1	1505	-2.6922	10.1875	68.6617	1.79035e-12	5.87236e-12	-1	Cerebray
L1_DM.3vsDM.1	1537	-0.205151	12.0957	0.562736	0.455289	0.496447	0	Vin_13
L1_DM.3vsDM.1	1688	-0.715698	8.966	2.85576	0.0948139	0.111068	0	Zymaflore_VL3c
L1_DM.3vsDM.1	1706	0.414546	15.6907	4.86407	0.0301971	0.03869	1	unknown
L1_DM.3vsDM.1	1709	-1.03015	9.4519	6.69975	0.0114337	0.0161649	-1	Wolf
L1_DM.3vsDM.1	1712	0.502365	16.482	5.6082	0.0202097	0.02762	1	YW8134
L1_DM.3vsDM.1	1716	-4.47624	7.28126	52.2773	2.75002e-10	7.77593e-10	-1	Petaluma_1A
L1_DM.3vsDM.1	1722	-5.85719	8.38292	114.584	2.77599e-17	2.06938e-16	-1	CBS_7045
L1_DM.3vsDM.1	1729	-6.26269	11.7095	193.196	2.40883e-23	4.93811e-22	-1	YW8003
L1_DM.3vsDM.1	1736	-0.671814	9.73867	3.21653	0.0765536	0.0923146	0	YW8154
L1_DM.3vsDM.1	1742	-3.22681	9.89196	62.8681	9.20289e-12	2.69513e-11	-1	YW8205
L1_DM.3vsDM.1	1756	1.01834	14.3172	7.20469	0.00916932	0.0134265	1	Morey_St_Denis
L1_DM.3vsDM.1	1757	-6.18643	9.38624	118.118	2.48581e-17	2.03836e-16	-1	Chateau_d.Yquem
L1_DM.3vsDM.1	1758	0.859817	12.8844	14.8709	0.000226924	0.000379751	1	Haut.Brion_1
L1_DM.3vsDM.1	1759	0.0515031	7.9145	0.0133434	0.908318	0.931026	0	Chateau_Cantemerle
L1_DM.3vsDM.1	1760	-1.18627	10.6015	9.43301	0.00288416	0.00446228	-1	Gruaud_Larose
L1_DM.3vsDM.1	1776	-2.9241	9.38875	45.3087	2.05639e-09	5.26949e-09	-1	Massey_GF7
L1_DM.3vsDM.1	1778	-2.87608	10.8041	46.3927	1.44068e-09	3.93785e-09	-1	Massey_GF8C
L1_DM.3vsDM.1	1781	-2.82626	10.9255	42.805	4.73556e-09	1.17672e-08	-1	YW8316_Yquem
L1_DM.3vsDM.1	1795	-0.00236408	15.53	0.000156449	0.99005	0.99005	0	Henri.Martin_8130
L1_DM.3vsDM.1	1796	-0.241819	14.2877	1.95674	0.165602	0.191259	0	YW8413
L1_DM.3vsDM.1	1833	-4.99983	7.67503	75.5589	7.26202e-13	2.48119e-12	-1	Uvaferm_43
L1_DM.3vsDM.1	1910	0.482256	13.8458	3.59322	0.0615091	0.0764204	0	NCYC_738.1
L1_DM.3vsDM.1	1918	-4.53932	8.01096	96.856	1.805e-15	8.22279e-15	-1	DSIR_Wine_Research__R102
L1_DM.3vsDM.1	2013	-1.472	8.90299	10.6575	0.00159563	0.00256553	-1	Blastocel_Grand_Cru
L1_DM.3vsDM.1	2078	1.44827	15.1813	34.8003	7.71753e-08	1.66536e-07	1	Lalvin_CY3079
L1_DM.3vsDM.1	2079	-0.902374	8.40619	4.9469	0.0288631	0.0381737	-1	Enoferm_T306
L1_DM.3vsDM.1	2260	-0.375686	14.0344	3.85861	0.0528503	0.0666726	0	Lalvin_QA23
L1_DM.3vsDM.1	2308	1.09348	13.4651	27.9129	1.01003e-06	1.97196e-06	1	Brocksopp_1
L1_DM.3vsDM.1	2776	-0.269424	14.5157	1.15913	0.284777	0.319887	0	NT_116
L1_DM.3vsDM.1	2851	1.39944	13.8477	41.323	7.82399e-09	1.83305e-08	1	Actiflore_Rose
L1_DM.3vsDM.1	2852	-7.14154	8.30599	131.759	8.20911e-18	7.47941e-17	-1	Zymaflore_F15
L1_DM.3vsDM.1	2858	-2.96342	12.7059	38.3376	4.6376e-08	1.02779e-07	-1	Zymaflore_VL1
L1_DM.3vsDM.1	2861	0.0543707	11.6719	0.0338209	0.854538	0.886989	0	Zymaflore_X5
L1_DM.3vsDM.1	2863	-1.14882	9.49894	8.48507	0.00460312	0.00698992	-1	Collection_Cepage_Chardonnay
L1_DM.3vsDM.1	2866	0.172149	9.77145	0.208644	0.64903	0.682313	0	Collection_Cepage_Sauvignon_Blanc
L1_DM.3vsDM.1	2867	-0.827976	12.1078	6.81637	0.0107224	0.0154252	-1	Collection_Cepage_Syrah
L1_DM.3vsDM.1	2874	-2.89196	9.99573	46.4085	1.5713e-09	4.15635e-09	-1	Fermicru_VR5
L1_DM.3vsDM.1	2878	-1.70917	12.3532	39.3035	1.5671e-08	3.5695e-08	-1	NT_112
L1_DM.3vsDM.1	2880	-2.68538	13.2438	97.1013	1.33314e-15	6.43044e-15	-1	NT_50
L1_DM.3vsDM.1	2881	-4.60006	10.1019	96.2153	2.68987e-15	1.16089e-14	-1	Vin_2000
L1_DM.3vsDM.1	2910	-0.809754	14.617	27.1738	1.34508e-06	2.56503e-06	-1	Maurivin_Elegance
L1_DM.3vsDM.1	2913	-11.231	9.29052	196.71	9.25945e-20	1.27818e-18	-1	Maurivin_Sauvignon
L1_DM.3vsDM.1	2914	0.507036	13.3443	1.1235	0.293069	0.324752	0	Maurivin_UOA_Maxithiol
L1_HS.3vsDM.3	81	-0.489202	9.95263	0.938086	0.335595	0.809376	0	X81_Brelez
L1_HS.3vsDM.3	170	-0.224571	9.39183	0.163752	0.68677	0.931172	0	Sep_1
L1_HS.3vsDM.3	213	0.73621	7.93611	0.504521	0.479732	0.855175	0	Tintara_1953
L1_HS.3vsDM.3	228	-0.257456	18.3341	0.564504	0.454584	0.847179	0	Stoneyfell_1949
L1_HS.3vsDM.3	266	-0.998397	8.8149	1.26841	0.263323	0.809376	0	X266
L1_HS.3vsDM.3	722	-0.658205	10.096	1.29379	0.258801	0.809376	0	X722
L1_HS.3vsDM.3	724	-0.568429	9.77442	1.0604	0.306126	0.809376	0	Bright_Tokay6
L1_HS.3vsDM.3	735	-0.603121	12.3862	2.01255	0.159761	0.809376	0	Beech_Wadenswil
L1_HS.3vsDM.3	740	0.0178989	9.66885	0.00128122	0.971537	0.99985	0	Trier_25
L1_HS.3vsDM.3	763	-0.297493	10.9029	0.325067	0.570124	0.914824	0	X763
L1_HS.3vsDM.3	778	-0.0984057	10.7951	0.00800281	0.928939	0.980747	0	X778
L1_HS.3vsDM.3	796	0.13086	19.7582	0.143026	0.70626	0.931172	0	X796
L1_HS.3vsDM.3	833	-1.53416	8.34981	1.85331	0.177284	0.809376	0	Penfolds_B
L1_HS.3vsDM.3	838	-0.199417	12.3976	0.619346	0.43354	0.843443	0	X838
L1_HS.3vsDM.3	896	-0.402905	10.1824	0.658613	0.41938	0.843443	0	X896
L1_HS.3vsDM.3	934	-1.04244	8.75086	3.34296	0.0711885	0.809376	0	UCD_48.41
L1_HS.3vsDM.3	935	-0.159744	8.17774	1.70951e-07	0.999672	0.99985	0	UCD_C.9
L1_HS.3vsDM.3	947	-0.0642568	12.9457	0.0233106	0.879024	0.961066	0	Beech_729
L1_HS.3vsDM.3	1001	0.279956	15.141	1.43817	0.233861	0.809376	0	Petaluma_1
L1_HS.3vsDM.3	1017	-0.0688556	12.6032	0.0341624	0.853814	0.961066	0	Petaluma_2
L1_HS.3vsDM.3	1082	0.628022	12.5499	2.27044	0.135674	0.809376	0	NCYC_761
L1_HS.3vsDM.3	1427	-0.203196	6.96881	3.5603e-08	0.99985	0.99985	0	Lalvin_WSK.27
L1_HS.3vsDM.3	1429	-0.116932	11.9753	0.158507	0.691561	0.931172	0	Lalvin_DV10
L1_HS.3vsDM.3	1432	-0.803899	13.073	1.39074	0.242557	0.809376	0	Vin_7
L1_HS.3vsDM.3	1436	-0.506052	9.71238	1.05259	0.307903	0.809376	0	Lalvin_S6U
L1_HS.3vsDM.3	1482	1.0581	9.80313	1.08071	0.301892	0.809376	0	C_Todd_1
L1_HS.3vsDM.3	1483	0.636553	14.5718	1.12857	0.291992	0.809376	0	Lalvin_ICV_D254
L1_HS.3vsDM.3	1485	0.86502	11.7833	2.13766	0.147948	0.809376	0	Lalvin_RC212
L1_HS.3vsDM.3	1486	0.250853	13.3648	0.521432	0.472269	0.855175	0	Lalvin_BM45
L1_HS.3vsDM.3	1487	0.15196	13.8163	0.0881087	0.767496	0.931172	0	Lalvin_Rhone_L2056
L1_HS.3vsDM.3	1488	0.0286036	15.6366	0.00983778	0.921231	0.980747	0	Lalvin_ICV_D47
L1_HS.3vsDM.3	1490	0.523122	14.5327	0.597574	0.442293	0.843443	0	Lalvin_Rhone_L2323
L1_HS.3vsDM.3	1491	0.281799	7.28014	0.0682207	0.794684	0.931172	0	Uvaferm_BDX
L1_HS.3vsDM.3	1493	-0.650067	10.5591	1.38727	0.242416	0.809376	0	Lalvin_71B
L1_HS.3vsDM.3	1497	0.147991	14.5471	0.138306	0.710973	0.931172	0	Lalvin_T73
L1_HS.3vsDM.3	1502	0.32643	12.0308	1.00793	0.318327	0.809376	0	Fusion
L1_HS.3vsDM.3	1503	0.133627	12.5564	0.146362	0.703018	0.931172	0	X1503
L1_HS.3vsDM.3	1504	0.0500204	13.3239	0.028173	0.867112	0.961066	0	X1504
L1_HS.3vsDM.3	1505	-0.750009	10.1875	2.8465	0.095342	0.809376	0	Cerebray
L1_HS.3vsDM.3	1537	0.426405	12.0957	1.2173	0.273093	0.809376	0	Vin_13
L1_HS.3vsDM.3	1688	-0.585675	8.966	0.952483	0.331935	0.809376	0	Zymaflore_VL3c
L1_HS.3vsDM.3	1706	0.222712	15.6907	0.704385	0.403734	0.843443	0	unknown
L1_HS.3vsDM.3	1709	-0.301244	9.4519	0.29065	0.591289	0.914824	0	Wolf
L1_HS.3vsDM.3	1712	0.369183	16.482	1.52113	0.220944	0.809376	0	YW8134
L1_HS.3vsDM.3	1716	-0.18018	7.28126	0.0262331	0.871748	0.961066	0	Petaluma_1A
L1_HS.3vsDM.3	1722	-0.0848051	8.38292	0.00713117	0.932906	0.980747	0	CBS_7045
L1_HS.3vsDM.3	1729	0.22013	11.7095	0.163329	0.687153	0.931172	0	YW8003
L1_HS.3vsDM.3	1736	-0.583817	9.73867	1.22059	0.272449	0.809376	0	YW8154
L1_HS.3vsDM.3	1742	-0.295611	9.89196	0.294794	0.588625	0.914824	0	YW8205
L1_HS.3vsDM.3	1756	0.172796	14.3172	0.10581	0.745987	0.931172	0	Morey_St_Denis
L1_HS.3vsDM.3	1757	0.793239	9.38624	1.02894	0.313516	0.809376	0	Chateau_d.Yquem
L1_HS.3vsDM.3	1758	0.115629	12.8844	0.136486	0.712744	0.931172	0	Haut.Brion_1
L1_HS.3vsDM.3	1759	-0.520089	7.9145	0.678972	0.412311	0.843443	0	Chateau_Cantemerle
L1_HS.3vsDM.3	1760	-0.455159	10.6015	0.705304	0.403429	0.843443	0	Gruaud_Larose
L1_HS.3vsDM.3	1776	-0.626518	9.38875	1.10712	0.295774	0.809376	0	Massey_GF7
L1_HS.3vsDM.3	1778	-0.123273	10.8041	0.0477041	0.827646	0.955873	0	Massey_GF8C
L1_HS.3vsDM.3	1781	-0.348761	10.9255	0.364284	0.547789	0.914824	0	YW8316_Yquem
L1_HS.3vsDM.3	1795	0.168661	15.53	0.39806	0.529833	0.914824	0	Henri.Martin_8130
L1_HS.3vsDM.3	1796	0.211873	14.2877	0.751897	0.388386	0.843443	0	YW8413
L1_HS.3vsDM.3	1833	-1.26586	7.67503	1.48734	0.226572	0.809376	0	Uvaferm_43
L1_HS.3vsDM.3	1910	-0.109584	13.8458	0.0931723	0.760949	0.931172	0	NCYC_738.1
L1_HS.3vsDM.3	1918	0.962362	8.01096	2.33027	0.13079	0.809376	0	DSIR_Wine_Research__R102
L1_HS.3vsDM.3	2013	-0.364709	8.90299	0.331771	0.566182	0.914824	0	Blastocel_Grand_Cru
L1_HS.3vsDM.3	2078	-0.158752	15.1813	0.217468	0.642202	0.931172	0	Lalvin_CY3079
L1_HS.3vsDM.3	2079	-0.73669	8.40619	1.62252	0.206309	0.809376	0	Enoferm_T306
L1_HS.3vsDM.3	2260	0.326788	14.0344	1.46306	0.22989	0.809376	0	Lalvin_QA23
L1_HS.3vsDM.3	2308	0.329044	13.4651	1.29219	0.258928	0.809376	0	Brocksopp_1
L1_HS.3vsDM.3	2776	0.572729	14.5157	2.61847	0.109435	0.809376	0	NT_116
L1_HS.3vsDM.3	2851	0.0818508	13.8477	0.0732905	0.787279	0.931172	0	Actiflore_Rose
L1_HS.3vsDM.3	2852	1.38528	8.30599	1.98976	0.162751	0.809376	0	Zymaflore_F15
L1_HS.3vsDM.3	2858	1.53348	12.7059	5.85618	0.018351	0.809376	0	Zymaflore_VL1
L1_HS.3vsDM.3	2861	0.677081	11.6719	2.61762	0.109491	0.809376	0	Zymaflore_X5
L1_HS.3vsDM.3	2863	-0.520461	9.49894	0.884738	0.349647	0.819172	0	Collection_Cepage_Chardonnay
L1_HS.3vsDM.3	2866	-1.09138	9.77145	4.14966	0.0448414	0.809376	0	Collection_Cepage_Sauvignon_Blanc
L1_HS.3vsDM.3	2867	0.346451	12.1078	0.605825	0.438585	0.843443	0	Collection_Cepage_Syrah
L1_HS.3vsDM.3	2874	-0.198536	9.99573	0.120462	0.729438	0.931172	0	Fermicru_VR5
L1_HS.3vsDM.3	2878	0.0980582	12.3532	0.0680111	0.794903	0.931172	0	NT_112
L1_HS.3vsDM.3	2880	0.149089	13.2438	0.168604	0.682417	0.931172	0	NT_50
L1_HS.3vsDM.3	2881	-0.188126	10.1019	0.0916793	0.762852	0.931172	0	Vin_2000
L1_HS.3vsDM.3	2910	0.438909	14.617	4.04023	0.0476879	0.809376	0	Maurivin_Elegance
L1_HS.3vsDM.3	2913	-0.187658	9.29052	1.04648e-07	0.999743	0.99985	0	Maurivin_Sauvignon
L1_HS.3vsDM.3	2914	0.404868	13.3443	0.359837	0.550672	0.914824	0	Maurivin_UOA_Maxithiol
L1_HC.3vsDM.3	81	-0.456704	9.95263	0.609227	0.437308	0.50506	0	X81_Brelez
L1_HC.3vsDM.3	170	-1.39734	9.39183	1.91568	0.170058	0.208131	0	Sep_1
L1_HC.3vsDM.3	213	-2.56692	7.93611	0.477967	0.491756	0.530579	0	Tintara_1953
L1_HC.3vsDM.3	228	4.12862	18.3341	134.372	5.17171e-19	1.0602e-17	1	Stoneyfell_1949
L1_HC.3vsDM.3	266	1.90474	8.8149	3.22883	0.0760035	0.0989251	0	X266
L1_HC.3vsDM.3	722	-6.7211	10.096	7.84396	0.00641371	0.0101139	-1	X722
L1_HC.3vsDM.3	724	-0.967654	9.77442	1.94914	0.166416	0.206759	0	Bright_Tokay6
L1_HC.3vsDM.3	735	1.9969	12.3862	20.4958	1.98669e-05	4.93663e-05	1	Beech_Wadenswil
L1_HC.3vsDM.3	740	-7.56843	9.66885	13.1017	0.000519871	0.000991383	-1	Trier_25
L1_HC.3vsDM.3	763	-3.14749	10.9029	7.4394	0.00779084	0.0120537	-1	X763
L1_HC.3vsDM.3	778	0.677628	10.7951	0.166627	0.684208	0.728637	0	X778
L1_HC.3vsDM.3	796	5.95195	19.7582	255.154	5.34503e-27	4.38293e-25	1	X796
L1_HC.3vsDM.3	833	-3.69244	8.34981	1.04594	0.309577	0.362647	0	Penfolds_B
L1_HC.3vsDM.3	838	1.60496	12.3976	39.0478	1.71266e-08	6.10602e-08	1	X838
L1_HC.3vsDM.3	896	-1.67714	10.1824	6.15831	0.0151048	0.0221178	-1	X896
L1_HC.3vsDM.3	934	-3.22404	8.75086	14.8589	0.000231616	0.000474812	-1	UCD_48.41
L1_HC.3vsDM.3	935	0.462717	8.17774	1.76779e-07	0.999666	0.99985	0	UCD_C.9
L1_HC.3vsDM.3	947	-4.27284	12.9457	70.8756	9.74168e-13	6.14476e-12	-1	Beech_729
L1_HC.3vsDM.3	1001	1.88294	15.141	63.7736	7.09409e-12	3.63572e-11	1	Petaluma_1
L1_HC.3vsDM.3	1017	-2.31295	12.6032	32.8289	1.58365e-07	4.9946e-07	-1	Petaluma_2
L1_HC.3vsDM.3	1082	-2.72025	12.5499	18.8156	4.04027e-05	9.46578e-05	-1	NCYC_761
L1_HC.3vsDM.3	1427	0.198715	6.96881	3.58606e-08	0.99985	0.99985	0	Lalvin_WSK.27
L1_HC.3vsDM.3	1429	1.93653	11.9753	41.983	6.25149e-09	2.3301e-08	1	Lalvin_DV10
L1_HC.3vsDM.3	1432	3.57205	13.073	26.1489	2.97833e-06	7.87817e-06	1	Vin_7
L1_HC.3vsDM.3	1436	-1.39173	9.71238	4.16349	0.0444948	0.0608096	0	Lalvin_S6U
L1_HC.3vsDM.3	1482	-2.72789	9.80313	0.510848	0.477	0.526094	0	C_Todd_1
L1_HC.3vsDM.3	1483	-3.99667	14.5718	32.9854	2.62838e-07	7.98249e-07	-1	Lalvin_ICV_D254
L1_HC.3vsDM.3	1485	-3.83814	11.7833	18.5934	4.91507e-05	0.000111954	-1	Lalvin_RC212
L1_HC.3vsDM.3	1486	-2.78574	13.3648	53.8639	1.34647e-10	6.13392e-10	-1	Lalvin_BM45
L1_HC.3vsDM.3	1487	-4.14521	13.8163	50.6896	8.44787e-10	3.46363e-09	-1	Lalvin_Rhone_L2056
L1_HC.3vsDM.3	1488	-2.54781	15.6366	72.9329	5.57829e-13	3.81183e-12	-1	Lalvin_ICV_D47
L1_HC.3vsDM.3	1490	-4.88204	14.5327	37.8219	5.25573e-08	1.72388e-07	-1	Lalvin_Rhone_L2323
L1_HC.3vsDM.3	1491	-2.90104	7.28014	0.510101	0.477382	0.526094	0	Uvaferm_BDX
L1_HC.3vsDM.3	1493	-7.646	10.5591	11.9716	0.000875389	0.00163141	-1	Lalvin_71B
L1_HC.3vsDM.3	1497	-3.00723	14.5471	50.1954	5.29756e-10	2.28631e-09	-1	Lalvin_T73
L1_HC.3vsDM.3	1502	1.07175	12.0308	10.1781	0.00200879	0.00358088	1	Fusion
L1_HC.3vsDM.3	1503	1.94433	12.5564	29.9912	4.56481e-07	1.33684e-06	1	X1503
L1_HC.3vsDM.3	1504	-1.66492	13.3239	26.1371	2.0177e-06	5.51505e-06	-1	X1504
L1_HC.3vsDM.3	1505	-0.389902	10.1875	0.500698	0.481183	0.526094	0	Cerebray
L1_HC.3vsDM.3	1537	-6.40492	12.0957	95.0081	2.17398e-15	1.98074e-14	-1	Vin_13
L1_HC.3vsDM.3	1688	-4.28292	8.966	13.0655	0.0005156	0.000991383	-1	Zymaflore_VL3c
L1_HC.3vsDM.3	1706	-0.758483	15.6907	8.0435	0.00574037	0.00941421	-1	unknown
L1_HC.3vsDM.3	1709	-2.06812	9.4519	6.43224	0.0131356	0.019584	-1	Wolf
L1_HC.3vsDM.3	1712	1.61781	16.482	28.8239	7.1166e-07	2.01228e-06	1	YW8134
L1_HC.3vsDM.3	1716	-4.22361	7.28126	1.33472	0.251463	0.298841	0	Petaluma_1A
L1_HC.3vsDM.3	1722	0.424297	8.38292	0.0662684	0.797489	0.827773	0	CBS_7045
L1_HC.3vsDM.3	1729	-2.53849	11.7095	3.83041	0.0537044	0.0721929	0	YW8003
L1_HC.3vsDM.3	1736	-2.27334	9.73867	9.33161	0.00303084	0.00517769	-1	YW8154
L1_HC.3vsDM.3	1742	1.36416	9.89196	5.0962	0.0266141	0.0382869	1	YW8205
L1_HC.3vsDM.3	1756	-5.67506	14.3172	76.2489	1.23103e-12	7.21029e-12	-1	Morey_St_Denis
L1_HC.3vsDM.3	1757	-4.79521	9.38624	1.75683	0.188855	0.227737	0	Chateau_d.Yquem
L1_HC.3vsDM.3	1758	-4.89316	12.8844	154.887	1.20562e-20	4.56549e-19	-1	Haut.Brion_1
L1_HC.3vsDM.3	1759	-3.63643	7.9145	8.81199	0.00391391	0.00654981	-1	Chateau_Cantemerle
L1_HC.3vsDM.3	1760	2.2305	10.6015	16.265	0.000122079	0.000263434	1	Gruaud_Larose
L1_HC.3vsDM.3	1776	-1.45611	9.38875	2.18062	0.143556	0.181102	0	Massey_GF7
L1_HC.3vsDM.3	1778	-4.68299	10.8041	15.8867	0.000144283	0.000303364	-1	Massey_GF8C
L1_HC.3vsDM.3	1781	-2.74962	10.9255	9.96899	0.00222231	0.00387723	-1	YW8316_Yquem
L1_HC.3vsDM.3	1795	2.47083	15.53	82.9199	4.12986e-14	3.38648e-13	1	Henri.Martin_8130
L1_HC.3vsDM.3	1796	1.84291	14.2877	55.7323	7.60281e-11	3.66724e-10	1	YW8413
L1_HC.3vsDM.3	1833	0.553003	7.67503	0.103078	0.749089	0.787503	0	Uvaferm_43
L1_HC.3vsDM.3	1910	3.76017	13.8458	103.198	3.31374e-16	3.39658e-15	1	NCYC_738.1
L1_HC.3vsDM.3	1918	-4.78436	8.01096	2.80176	0.11734	0.150342	0	DSIR_Wine_Research__R102
L1_HC.3vsDM.3	2013	-2.50144	8.90299	4.93542	0.0290442	0.0410625	-1	Blastocel_Grand_Cru
L1_HC.3vsDM.3	2078	-3.14131	15.1813	77.9113	1.49255e-13	1.11263e-12	-1	Lalvin_CY3079
L1_HC.3vsDM.3	2079	-2.76439	8.40619	7.85297	0.00631811	0.0101139	-1	Enoferm_T306
L1_HC.3vsDM.3	2260	2.84768	14.0344	106.903	1.45442e-16	1.70375e-15	1	Lalvin_QA23
L1_HC.3vsDM.3	2308	-3.52033	13.4651	120.901	7.46198e-18	1.22376e-16	-1	Brocksopp_1
L1_HC.3vsDM.3	2776	-5.35781	14.5157	153.033	1.6703e-20	4.56549e-19	-1	NT_116
L1_HC.3vsDM.3	2851	-3.7368	13.8477	119.56	9.82646e-18	1.34295e-16	-1	Actiflore_Rose
L1_HC.3vsDM.3	2852	-2.70086	8.30599	0.510307	0.477358	0.526094	0	Zymaflore_F15
L1_HC.3vsDM.3	2858	-3.8157	12.7059	14.0529	0.000382381	0.000764762	-1	Zymaflore_VL1
L1_HC.3vsDM.3	2861	-4.85357	11.6719	66.8394	2.97513e-12	1.6264e-11	-1	Zymaflore_X5
L1_HC.3vsDM.3	2863	-5.04362	9.49894	21.7158	1.19682e-05	3.06685e-05	-1	Collection_Cepage_Chardonnay
L1_HC.3vsDM.3	2866	1.18027	9.77145	4.59768	0.034951	0.048576	1	Collection_Cepage_Sauvignon_Blanc
L1_HC.3vsDM.3	2867	-3.99259	12.1078	42.2363	5.73753e-09	2.24037e-08	-1	Collection_Cepage_Syrah
L1_HC.3vsDM.3	2874	-3.90825	9.99573	10.5786	0.00167115	0.0030452	-1	Fermicru_VR5
L1_HC.3vsDM.3	2878	-3.03838	12.3532	38.1869	2.31299e-08	7.90272e-08	-1	NT_112
L1_HC.3vsDM.3	2880	0.97906	13.2438	6.96945	0.00990879	0.0150467	1	NT_50
L1_HC.3vsDM.3	2881	-2.56017	10.1019	3.59941	0.0614683	0.0812968	0	Vin_2000
L1_HC.3vsDM.3	2910	0.98794	14.617	20.2101	2.23935e-05	5.40079e-05	1	Maurivin_Elegance
L1_HC.3vsDM.3	2913	0.417983	9.29052	1.08725e-07	0.999738	0.99985	0	Maurivin_Sauvignon
L1_HC.3vsDM.3	2914	-3.1795	13.3443	18.1636	6.65386e-05	0.000147464	-1	Maurivin_UOA_Maxithiol
L1_LpH.3vsDM.3	81	-0.130284	9.95263	0.0666136	0.796974	0.859893	0	X81_Brelez
L1_LpH.3vsDM.3	170	1.88758	9.39183	12.6341	0.000629318	0.00322526	1	Sep_1
L1_LpH.3vsDM.3	213	2.02545	7.93611	4.13606	0.0455307	0.103709	0	Tintara_1953
L1_LpH.3vsDM.3	228	-1.77154	18.3341	26.2985	1.8937e-06	3.74819e-05	-1	Stoneyfell_1949
L1_LpH.3vsDM.3	266	-0.377727	8.8149	0.201954	0.654324	0.788879	0	X266
L1_LpH.3vsDM.3	722	0.681522	10.096	1.49949	0.224403	0.368021	0	X722
L1_LpH.3vsDM.3	724	-0.868635	9.77442	2.37543	0.127076	0.242331	0	Bright_Tokay6
L1_LpH.3vsDM.3	735	-0.158753	12.3862	0.139708	0.709528	0.819455	0	Beech_Wadenswil
L1_LpH.3vsDM.3	740	0.395348	9.66885	0.566925	0.45373	0.60963	0	Trier_25
L1_LpH.3vsDM.3	763	0.722383	10.9029	1.95534	0.165751	0.3089	0	X763
L1_LpH.3vsDM.3	778	0.367772	10.7951	0.125955	0.723589	0.824087	0	X778
L1_LpH.3vsDM.3	796	-1.22307	19.7582	12.3908	0.000704578	0.00339855	-1	X796
L1_LpH.3vsDM.3	833	0.890712	8.34981	0.998302	0.320784	0.46972	0	Penfolds_B
L1_LpH.3vsDM.3	838	1.16809	12.3976	21.2567	1.4471e-05	0.000169518	1	X838
L1_LpH.3vsDM.3	896	-2.01102	10.1824	14.6641	0.000249033	0.00145862	-1	X896
L1_LpH.3vsDM.3	934	-2.67908	8.75086	19.8058	2.71977e-05	0.000278777	-1	UCD_48.41
L1_LpH.3vsDM.3	935	0.911663	8.17774	1.81973e-07	0.999661	0.999845	0	UCD_C.9
L1_LpH.3vsDM.3	947	-0.464942	12.9457	1.21757	0.273038	0.414613	0	Beech_729
L1_LpH.3vsDM.3	1001	1.70383	15.141	52.6198	1.97904e-10	1.62281e-08	1	Petaluma_1
L1_LpH.3vsDM.3	1017	-0.672669	12.6032	3.24778	0.0751643	0.154087	0	Petaluma_2
L1_LpH.3vsDM.3	1082	0.766006	12.5499	3.39513	0.068973	0.148836	0	NCYC_761
L1_LpH.3vsDM.3	1427	0.866313	6.96881	3.81137e-08	0.999845	0.999845	0	Lalvin_WSK.27
L1_LpH.3vsDM.3	1429	1.52344	11.9753	26.8867	1.50428e-06	3.74819e-05	1	Lalvin_DV10
L1_LpH.3vsDM.3	1432	-1.78322	13.073	6.72105	0.0117452	0.0332105	-1	Vin_7
L1_LpH.3vsDM.3	1436	0.549893	9.71238	1.2539	0.266051	0.411626	0	Lalvin_S6U
L1_LpH.3vsDM.3	1482	0.37424	9.80313	0.0457475	0.831218	0.873845	0	C_Todd_1
L1_LpH.3vsDM.3	1483	-0.696238	14.5718	1.34622	0.250162	0.394487	0	Lalvin_ICV_D254
L1_LpH.3vsDM.3	1485	-0.282093	11.7833	0.225364	0.636379	0.786991	0	Lalvin_RC212
L1_LpH.3vsDM.3	1486	0.659141	13.3648	3.59752	0.0613574	0.135981	0	Lalvin_BM45
L1_LpH.3vsDM.3	1487	-1.64466	13.8163	10.1457	0.00218012	0.00713206	-1	Lalvin_Rhone_L2056
L1_LpH.3vsDM.3	1488	0.0842388	15.6366	0.0853253	0.770938	0.854283	0	Lalvin_ICV_D47
L1_LpH.3vsDM.3	1490	0.00278016	14.5327	1.69306e-05	0.99673	0.999845	0	Lalvin_Rhone_L2323
L1_LpH.3vsDM.3	1491	-1.13325	7.28014	0.635232	0.428038	0.605157	0	Uvaferm_BDX
L1_LpH.3vsDM.3	1493	-0.219901	10.5591	0.160011	0.69023	0.808555	0	Lalvin_71B
L1_LpH.3vsDM.3	1497	0.238201	14.5471	0.358418	0.551111	0.706111	0	Lalvin_T73
L1_LpH.3vsDM.3	1502	1.61776	12.0308	24.5794	3.74161e-06	5.11354e-05	1	Fusion
L1_LpH.3vsDM.3	1503	1.37938	12.5564	15.6176	0.000162574	0.00121192	1	X1503
L1_LpH.3vsDM.3	1504	1.08894	13.3239	13.3121	0.000460342	0.00251654	1	X1504
L1_LpH.3vsDM.3	1505	0.793555	10.1875	3.31672	0.072195	0.151795	0	Cerebray
L1_LpH.3vsDM.3	1537	0.924504	12.0957	5.72274	0.0190138	0.0487229	1	Vin_13
L1_LpH.3vsDM.3	1688	-0.743823	8.966	1.52575	0.22025	0.368021	0	Zymaflore_VL3c
L1_LpH.3vsDM.3	1706	1.14844	15.6907	18.622	4.3888e-05	0.000399869	1	unknown
L1_LpH.3vsDM.3	1709	0.424063	9.4519	0.586098	0.446166	0.60963	0	Wolf
L1_LpH.3vsDM.3	1712	1.04037	16.482	12.027	0.000834897	0.00350446	1	YW8134
L1_LpH.3vsDM.3	1716	0.76408	7.28126	0.646543	0.423774	0.605157	0	Petaluma_1A
L1_LpH.3vsDM.3	1722	0.659353	8.38292	0.548719	0.46094	0.60963	0	CBS_7045
L1_LpH.3vsDM.3	1729	1.82166	11.7095	11.4588	0.00109044	0.00425791	1	YW8003
L1_LpH.3vsDM.3	1736	0.140316	9.73867	0.0722685	0.788732	0.859893	0	YW8154
L1_LpH.3vsDM.3	1742	-0.608863	9.89196	1.1818	0.280149	0.417677	0	YW8205
L1_LpH.3vsDM.3	1756	-0.172597	14.3172	0.105546	0.746293	0.838302	0	Morey_St_Denis
L1_LpH.3vsDM.3	1757	-1.28893	9.38624	1.574	0.21334	0.368021	0	Chateau_d.Yquem
L1_LpH.3vsDM.3	1758	-0.990771	12.8844	9.933	0.00226139	0.00713206	-1	Haut.Brion_1
L1_LpH.3vsDM.3	1759	-2.01126	7.9145	8.91356	0.00372234	0.0113049	-1	Chateau_Cantemerle
L1_LpH.3vsDM.3	1760	-0.416186	10.6015	0.586487	0.445961	0.60963	0	Gruaud_Larose
L1_LpH.3vsDM.3	1776	1.37598	9.38875	5.60333	0.0202623	0.0503488	0	Massey_GF7
L1_LpH.3vsDM.3	1778	0.263489	10.8041	0.216387	0.643029	0.786991	0	Massey_GF8C
L1_LpH.3vsDM.3	1781	-0.327013	10.9255	0.31608	0.575494	0.726007	0	YW8316_Yquem
L1_LpH.3vsDM.3	1795	0.930901	15.53	12.0863	0.000812052	0.00350446	1	Henri.Martin_8130
L1_LpH.3vsDM.3	1796	1.24508	14.2877	25.8207	2.28548e-06	3.74819e-05	1	YW8413
L1_LpH.3vsDM.3	1833	-3.74767	7.67503	6.3396	0.01401	0.038294	-1	Uvaferm_43
L1_LpH.3vsDM.3	1910	-0.474343	13.8458	1.74383	0.190298	0.346764	0	NCYC_738.1
L1_LpH.3vsDM.3	1918	-2.18433	8.01096	5.99594	0.0165063	0.0436619	-1	DSIR_Wine_Research__R102
L1_LpH.3vsDM.3	2013	0.742962	8.90299	1.40843	0.238716	0.383818	0	Blastocel_Grand_Cru
L1_LpH.3vsDM.3	2078	-1.34302	15.1813	15.4193	0.000177574	0.00121342	-1	Lalvin_CY3079
L1_LpH.3vsDM.3	2079	-0.950854	8.40619	2.65008	0.107349	0.209586	0	Enoferm_T306
L1_LpH.3vsDM.3	2260	-0.063404	14.0344	0.0550946	0.815004	0.867927	0	Lalvin_QA23
L1_LpH.3vsDM.3	2308	-0.824002	13.4651	8.08057	0.00563451	0.0165011	-1	Brocksopp_1
L1_LpH.3vsDM.3	2776	1.2278	14.5157	11.9768	0.000854747	0.00350446	1	NT_116
L1_LpH.3vsDM.3	2851	0.189508	13.8477	0.393332	0.532281	0.69281	0	Actiflore_Rose
L1_LpH.3vsDM.3	2852	-0.453588	8.30599	0.190522	0.663813	0.788879	0	Zymaflore_F15
L1_LpH.3vsDM.3	2858	2.11936	12.7059	11.1571	0.0013953	0.00476729	1	Zymaflore_VL1
L1_LpH.3vsDM.3	2861	-1.3981	11.6719	11.0516	0.00132232	0.00472705	-1	Zymaflore_X5
L1_LpH.3vsDM.3	2863	-1.9103	9.49894	11.046	0.00132588	0.00472705	-1	Collection_Cepage_Chardonnay
L1_LpH.3vsDM.3	2866	-2.19768	9.77145	15.7938	0.000150349	0.00121192	-1	Collection_Cepage_Sauvignon_Blanc
L1_LpH.3vsDM.3	2867	0.90752	12.1078	4.16045	0.0445707	0.103709	0	Collection_Cepage_Syrah
L1_LpH.3vsDM.3	2874	1.00547	9.99573	3.13791	0.0802672	0.160534	0	Fermicru_VR5
L1_LpH.3vsDM.3	2878	2.38178	12.3532	39.5009	1.46344e-08	6.00012e-07	1	NT_112
L1_LpH.3vsDM.3	2880	0.819626	13.2438	5.09689	0.0266041	0.0641628	0	NT_50
L1_LpH.3vsDM.3	2881	0.760529	10.1019	1.55489	0.216114	0.368021	0	Vin_2000
L1_LpH.3vsDM.3	2910	0.850914	14.617	15.1587	0.000199477	0.00125824	1	Maurivin_Elegance
L1_LpH.3vsDM.3	2913	0.548855	9.29052	1.0747e-07	0.99974	0.999845	0	Maurivin_Sauvignon
L1_LpH.3vsDM.3	2914	-0.836042	13.3443	1.52511	0.221271	0.368021	0	Maurivin_UOA_Maxithiol
L1_LYAN.3vsDM.3	1537	-5.57878	12.0957	153.764	1.46841e-20	1.20409e-18	-1	Vin_13
L1_LYAN.3vsDM.3	2863	-4.50136	9.49894	47.5903	9.75939e-10	2.00068e-08	-1	Collection_Cepage_Chardonnay
L1_LYAN.3vsDM.3	2861	-4.35668	11.6719	88.5815	1.01297e-14	4.15317e-13	-1	Zymaflore_X5
L1_LYAN.3vsDM.3	1756	-3.53693	14.3172	41.3336	1.6135e-08	2.64614e-07	-1	Morey_St_Denis
L1_LYAN.3vsDM.3	1781	-3.40824	10.9255	27.6254	1.1288e-06	1.00306e-05	-1	YW8316_Yquem
L1_LYAN.3vsDM.3	934	-3.10398	8.75086	25.9496	2.25559e-06	1.68144e-05	-1	UCD_48.41
L1_LYAN.3vsDM.3	1483	-3.08411	14.5718	25.0726	4.44458e-06	2.8035e-05	-1	Lalvin_ICV_D254
L1_LYAN.3vsDM.3	2881	-3.05104	10.1019	15.7809	0.000156447	0.000641433	-1	Vin_2000
L1_LYAN.3vsDM.3	2852	-3.02209	8.30599	3.94175	0.050982	0.0995363	0	Zymaflore_F15
L1_LYAN.3vsDM.3	1491	-2.92136	7.28014	3.26857	0.0747555	0.137247	0	Uvaferm_BDX
L1_LYAN.3vsDM.3	1490	-2.78075	14.5327	16.2017	0.000150594	0.000641433	-1	Lalvin_Rhone_L2323
L1_LYAN.3vsDM.3	1757	-2.55135	9.38624	5.38025	0.02296	0.0522978	0	Chateau_d.Yquem
L1_LYAN.3vsDM.3	1486	-2.5377	13.3648	51.0976	3.18641e-10	8.70952e-09	-1	Lalvin_BM45
L1_LYAN.3vsDM.3	1485	-2.48686	11.7833	16.4311	0.000123219	0.000561331	-1	Lalvin_RC212
L1_LYAN.3vsDM.3	2874	-2.41589	9.99573	14.8961	0.000227786	0.000889451	-1	Fermicru_VR5
L1_LYAN.3vsDM.3	1497	-2.36098	14.5471	34.1174	1.12106e-07	1.31324e-06	-1	Lalvin_T73
L1_LYAN.3vsDM.3	2776	-2.03364	14.5157	32.2133	1.98768e-07	2.03737e-06	-1	NT_116
L1_LYAN.3vsDM.3	1833	-1.94692	7.67503	3.18784	0.0783588	0.137247	0	Uvaferm_43
L1_LYAN.3vsDM.3	1493	-1.8922	10.5591	10.3269	0.00190125	0.00649594	-1	Lalvin_71B
L1_LYAN.3vsDM.3	1722	-1.88961	8.38292	3.23405	0.0757712	0.137247	0	CBS_7045
L1_LYAN.3vsDM.3	896	-1.88234	10.1824	13.2805	0.000467063	0.00166518	-1	X896
L1_LYAN.3vsDM.3	2013	-1.82133	8.90299	7.47606	0.00764685	0.0216221	-1	Blastocel_Grand_Cru
L1_LYAN.3vsDM.3	1918	-1.71665	8.01096	4.65089	0.034014	0.0715167	0	DSIR_Wine_Research__R102
L1_LYAN.3vsDM.3	1778	-1.69267	10.8041	8.39586	0.00481232	0.0146152	-1	Massey_GF8C
L1_LYAN.3vsDM.3	1729	-1.66609	11.7095	7.30567	0.00834039	0.0227971	-1	YW8003
L1_LYAN.3vsDM.3	763	-1.47999	10.9029	7.19231	0.00883798	0.0233779	-1	X763
L1_LYAN.3vsDM.3	1688	-1.4746	8.966	5.82461	0.0180129	0.0434429	-1	Zymaflore_VL3c
L1_LYAN.3vsDM.3	1487	-1.46474	13.8163	8.08307	0.00588765	0.0172424	-1	Lalvin_Rhone_L2056
L1_LYAN.3vsDM.3	1017	-1.39577	12.6032	13.8524	0.000359609	0.00134036	-1	Petaluma_2
L1_LYAN.3vsDM.3	1759	-1.1552	7.9145	3.37291	0.06987	0.13324	0	Chateau_Cantemerle
L1_LYAN.3vsDM.3	2866	-1.13756	9.77145	4.50452	0.0367968	0.0735935	0	Collection_Cepage_Sauvignon_Blanc
L1_LYAN.3vsDM.3	2079	-1.0335	8.40619	3.1702	0.0786659	0.137247	0	Enoferm_T306
L1_LYAN.3vsDM.3	1082	-0.894124	12.5499	4.53103	0.0362612	0.0735935	0	NCYC_761
L1_LYAN.3vsDM.3	1432	-0.865003	13.073	1.60859	0.209192	0.323656	0	Vin_7
L1_LYAN.3vsDM.3	2851	-0.686311	13.8477	5.15218	0.0258193	0.0572213	0	Actiflore_Rose
L1_LYAN.3vsDM.3	947	-0.684706	12.9457	2.63794	0.108145	0.180977	0	Beech_729
L1_LYAN.3vsDM.3	1436	-0.682793	9.71238	1.89216	0.172673	0.272292	0	Lalvin_S6U
L1_LYAN.3vsDM.3	2914	-0.670215	13.3443	0.982994	0.325119	0.459651	0	Maurivin_UOA_Maxithiol
L1_LYAN.3vsDM.3	740	-0.670054	9.66885	1.5672	0.214322	0.325452	0	Trier_25
L1_LYAN.3vsDM.3	778	-0.60302	10.7951	0.386599	0.535845	0.665747	0	X778
L1_LYAN.3vsDM.3	1742	-0.587009	9.89196	1.14339	0.288048	0.414385	0	YW8205
L1_LYAN.3vsDM.3	228	-0.522906	18.3341	2.32571	0.131068	0.210737	0	Stoneyfell_1949
L1_LYAN.3vsDM.3	2867	-0.478318	12.1078	1.15002	0.286665	0.414385	0	Collection_Cepage_Syrah
L1_LYAN.3vsDM.3	735	-0.372109	12.3862	0.774682	0.381323	0.512598	0	Beech_Wadenswil
L1_LYAN.3vsDM.3	1488	-0.351367	15.6366	1.48368	0.226663	0.337935	0	Lalvin_ICV_D47
L1_LYAN.3vsDM.3	266	-0.304951	8.8149	0.14048	0.708764	0.807203	0	X266
L1_LYAN.3vsDM.3	1758	-0.30016	12.8844	0.919474	0.340408	0.47311	0	Haut.Brion_1
L1_LYAN.3vsDM.3	1482	-0.274666	9.80313	0.0666494	0.796989	0.872318	0	C_Todd_1
L1_LYAN.3vsDM.3	2078	-0.251865	15.1813	0.547436	0.461463	0.610322	0	Lalvin_CY3079
L1_LYAN.3vsDM.3	796	-0.245764	19.7582	0.504438	0.479555	0.624182	0	X796
L1_LYAN.3vsDM.3	2878	-0.171866	12.3532	0.20887	0.648853	0.760085	0	NT_112
L1_LYAN.3vsDM.3	1760	-0.132498	10.6015	0.0602022	0.806785	0.872318	0	Gruaud_Larose
L1_LYAN.3vsDM.3	1736	-0.0672233	9.73867	0.0162719	0.898806	0.944898	0	YW8154
L1_LYAN.3vsDM.3	724	-0.0198119	9.77442	0.00130381	0.971283	0.999849	0	Bright_Tokay6
L1_LYAN.3vsDM.3	1504	0.0882993	13.3239	0.0878995	0.767608	0.862245	0	X1504
L1_LYAN.3vsDM.3	81	0.0971537	9.95263	0.0376628	0.846598	0.901572	0	X81_Brelez
L1_LYAN.3vsDM.3	838	0.137244	12.3976	0.295019	0.588483	0.702501	0	X838
L1_LYAN.3vsDM.3	2913	0.162473	9.29052	1.04846e-07	0.999743	0.999849	0	Maurivin_Sauvignon
L1_LYAN.3vsDM.3	833	0.208042	8.34981	0.0591421	0.80849	0.872318	0	Penfolds_B
L1_LYAN.3vsDM.3	722	0.218205	10.096	0.156672	0.69331	0.800724	0	X722
L1_LYAN.3vsDM.3	935	0.310696	8.17774	1.72442e-07	0.99967	0.999849	0	UCD_C.9
L1_LYAN.3vsDM.3	2858	0.342391	12.7059	0.291487	0.591129	0.702501	0	Zymaflore_VL1
L1_LYAN.3vsDM.3	1709	0.369484	9.4519	0.444095	0.507053	0.639667	0	Wolf
L1_LYAN.3vsDM.3	1505	0.38392	10.1875	0.777476	0.38047	0.512598	0	Cerebray
L1_LYAN.3vsDM.3	1427	0.392007	6.96881	3.61283e-08	0.999849	0.999849	0	Lalvin_WSK.27
L1_LYAN.3vsDM.3	1776	0.392847	9.38875	0.452707	0.502928	0.639667	0	Massey_GF7
L1_LYAN.3vsDM.3	1716	0.50086	7.28126	0.320916	0.57267	0.700879	0	Petaluma_1A
L1_LYAN.3vsDM.3	1502	0.518097	12.0308	2.53999	0.114811	0.188289	0	Fusion
L1_LYAN.3vsDM.3	1795	0.58655	15.53	4.808	0.0311372	0.0671908	0	Henri.Martin_8130
L1_LYAN.3vsDM.3	1910	0.595997	13.8458	2.76128	0.100357	0.171444	0	NCYC_738.1
L1_LYAN.3vsDM.3	2308	0.694007	13.4651	5.74661	0.0187742	0.0439853	1	Brocksopp_1
L1_LYAN.3vsDM.3	1429	0.866376	11.9753	8.74031	0.00405524	0.0133012	1	Lalvin_DV10
L1_LYAN.3vsDM.3	2880	0.923839	13.2438	6.4783	0.0127772	0.0317493	1	NT_50
L1_LYAN.3vsDM.3	1796	1.02783	14.2877	17.6239	6.74351e-05	0.000345605	1	YW8413
L1_LYAN.3vsDM.3	1706	1.15402	15.6907	18.802	4.06387e-05	0.000238026	1	unknown
L1_LYAN.3vsDM.3	2260	1.1654	14.0344	18.517	4.59043e-05	0.000250944	1	Lalvin_QA23
L1_LYAN.3vsDM.3	1001	1.17377	15.141	25.1444	2.98718e-06	2.04124e-05	1	Petaluma_1
L1_LYAN.3vsDM.3	1712	1.21877	16.482	16.4704	0.000111534	0.000537989	1	YW8134
L1_LYAN.3vsDM.3	2910	1.36073	14.617	38.556	2.03284e-08	2.77821e-07	1	Maurivin_Elegance
L1_LYAN.3vsDM.3	170	1.54233	9.39183	8.52753	0.00450691	0.0142141	1	Sep_1
L1_LYAN.3vsDM.3	1503	1.8335	12.5564	27.4182	1.22324e-06	1.00306e-05	1	X1503
L1_LYAN.3vsDM.3	213	2.38406	7.93611	6.6293	0.0120102	0.030776	1	Tintara_1953
L1_HK.3vsDM.3	81	-1.00475	9.95263	3.9011	0.0515909	0.141015	0	X81_Brelez
L1_HK.3vsDM.3	170	1.13195	9.39183	4.55982	0.0356889	0.108389	0	Sep_1
L1_HK.3vsDM.3	213	0.758864	7.93611	0.56747	0.453634	0.641344	0	Tintara_1953
L1_HK.3vsDM.3	228	-1.67545	18.3341	23.5674	5.61975e-06	9.44177e-05	-1	Stoneyfell_1949
L1_HK.3vsDM.3	266	0.197242	8.8149	0.0599065	0.80725	0.959341	0	X266
L1_HK.3vsDM.3	722	0.432297	10.096	0.641078	0.425731	0.635501	0	X722
L1_HK.3vsDM.3	724	-1.94801	9.77442	11.5933	0.00102343	0.00631868	-1	Bright_Tokay6
L1_HK.3vsDM.3	735	0.42189	12.3862	1.01034	0.317753	0.53175	0	Beech_Wadenswil
L1_HK.3vsDM.3	740	-0.284087	9.66885	0.290171	0.591632	0.782481	0	Trier_25
L1_HK.3vsDM.3	763	0.368108	10.9029	0.51722	0.474057	0.658859	0	X763
L1_HK.3vsDM.3	778	1.83696	10.7951	6.03027	0.0162107	0.0686165	0	X778
L1_HK.3vsDM.3	796	-0.825441	19.7582	5.66983	0.0195567	0.0748194	0	X796
L1_HK.3vsDM.3	833	0.863297	8.34981	1.12192	0.292746	0.500108	0	Penfolds_B
L1_HK.3vsDM.3	838	0.40773	12.3976	2.60003	0.110672	0.226877	0	X838
L1_HK.3vsDM.3	896	-0.837476	10.1824	2.8127	0.0972974	0.211999	0	X896
L1_HK.3vsDM.3	934	-2.55612	8.75086	18.6381	4.45542e-05	0.000599235	-1	UCD_48.41
L1_HK.3vsDM.3	935	0.270412	8.17774	1.72018e-07	0.999671	0.99985	0	UCD_C.9
L1_HK.3vsDM.3	947	-0.642672	12.9457	2.32386	0.131219	0.262437	0	Beech_729
L1_HK.3vsDM.3	1001	1.41629	15.141	36.5072	4.18528e-08	3.43193e-06	1	Petaluma_1
L1_HK.3vsDM.3	1017	-0.657428	12.6032	3.10272	0.0818576	0.197421	0	Petaluma_2
L1_HK.3vsDM.3	1082	2.01957	12.5499	23.5076	5.75718e-06	9.44177e-05	1	NCYC_761
L1_HK.3vsDM.3	1427	0.228007	6.96881	3.57391e-08	0.99985	0.99985	0	Lalvin_WSK.27
L1_HK.3vsDM.3	1429	0.958244	11.9753	10.6829	0.00157641	0.00861773	1	Lalvin_DV10
L1_HK.3vsDM.3	1432	-1.74401	13.073	6.42339	0.0136681	0.0628881	0	Vin_7
L1_HK.3vsDM.3	1436	-0.0869126	9.71238	0.0314761	0.859616	0.996917	0	Lalvin_S6U
L1_HK.3vsDM.3	1482	1.40359	9.80313	1.93081	0.168798	0.329558	0	C_Todd_1
L1_HK.3vsDM.3	1483	1.06766	14.5718	3.16432	0.0799163	0.197421	0	Lalvin_ICV_D254
L1_HK.3vsDM.3	1485	1.38297	11.7833	5.4486	0.0222966	0.0794921	0	Lalvin_RC212
L1_HK.3vsDM.3	1486	-0.263226	13.3648	0.573983	0.450834	0.641344	0	Lalvin_BM45
L1_HK.3vsDM.3	1487	-0.471976	13.8163	0.848325	0.360268	0.590839	0	Lalvin_Rhone_L2056
L1_HK.3vsDM.3	1488	-0.178727	15.6366	0.384043	0.537151	0.722072	0	Lalvin_ICV_D47
L1_HK.3vsDM.3	1490	-0.0482679	14.5327	0.00509422	0.943318	0.99985	0	Lalvin_Rhone_L2323
L1_HK.3vsDM.3	1491	0.060469	7.28014	0.0103487	0.919252	0.99985	0	Uvaferm_BDX
L1_HK.3vsDM.3	1493	-0.263212	10.5591	0.235089	0.629122	0.818858	0	Lalvin_71B
L1_HK.3vsDM.3	1497	0.145499	14.5471	0.133716	0.715594	0.902749	0	Lalvin_T73
L1_HK.3vsDM.3	1502	0.794058	12.0308	5.96362	0.0167357	0.0686165	0	Fusion
L1_HK.3vsDM.3	1503	0.87616	12.5564	6.33007	0.0138047	0.0628881	0	X1503
L1_HK.3vsDM.3	1504	1.63715	13.3239	29.9208	4.68804e-07	1.9221e-05	1	X1504
L1_HK.3vsDM.3	1505	-0.131796	10.1875	0.0901278	0.764768	0.935985	0	Cerebray
L1_HK.3vsDM.3	1537	0.77638	12.0957	4.03947	0.0477083	0.134899	0	Vin_13
L1_HK.3vsDM.3	1688	-1.43635	8.966	5.62089	0.0200735	0.0748194	0	Zymaflore_VL3c
L1_HK.3vsDM.3	1706	0.309158	15.6907	1.35714	0.247383	0.461032	0	unknown
L1_HK.3vsDM.3	1709	0.00388359	9.4519	5.43458e-05	0.994136	0.99985	0	Wolf
L1_HK.3vsDM.3	1712	0.101524	16.482	0.115094	0.735277	0.913526	0	YW8134
L1_HK.3vsDM.3	1716	-0.286439	7.28126	0.0782432	0.780426	0.941102	0	Petaluma_1A
L1_HK.3vsDM.3	1722	-0.383939	8.38292	0.188013	0.665705	0.852934	0	CBS_7045
L1_HK.3vsDM.3	1729	1.20274	11.7095	5.03886	0.027455	0.0900523	0	YW8003
L1_HK.3vsDM.3	1736	0.037964	9.73867	0.00531843	0.94204	0.99985	0	YW8154
L1_HK.3vsDM.3	1742	-0.942258	9.89196	2.85537	0.0948363	0.211999	0	YW8205
L1_HK.3vsDM.3	1756	0.0246695	14.3172	0.0021567	0.963099	0.99985	0	Morey_St_Denis
L1_HK.3vsDM.3	1757	-1.7327	9.38624	3.3007	0.0730576	0.193249	0	Chateau_d.Yquem
L1_HK.3vsDM.3	1758	-1.10472	12.8844	12.3563	0.000715995	0.00489263	-1	Haut.Brion_1
L1_HK.3vsDM.3	1759	-2.52615	7.9145	14.7015	0.000244874	0.00200797	-1	Chateau_Cantemerle
L1_HK.3vsDM.3	1760	-0.589272	10.6015	1.18085	0.280341	0.499738	0	Gruaud_Larose
L1_HK.3vsDM.3	1776	-0.485412	9.38875	0.669847	0.415457	0.635501	0	Massey_GF7
L1_HK.3vsDM.3	1778	0.0921566	10.8041	0.0270486	0.869767	0.996917	0	Massey_GF8C
L1_HK.3vsDM.3	1781	-0.974154	10.9255	2.79662	0.0982432	0.211999	0	YW8316_Yquem
L1_HK.3vsDM.3	1795	0.476242	15.53	3.17274	0.0785488	0.197421	0	Henri.Martin_8130
L1_HK.3vsDM.3	1796	0.828661	14.2877	11.4815	0.0010788	0.00631868	1	YW8413
L1_HK.3vsDM.3	1833	-0.031616	7.67503	0.000831486	0.977075	0.99985	0	Uvaferm_43
L1_HK.3vsDM.3	1910	-0.830573	13.8458	5.33785	0.0233587	0.0798089	0	NCYC_738.1
L1_HK.3vsDM.3	1918	0.673984	8.01096	1.14815	0.287132	0.500108	0	DSIR_Wine_Research__R102
L1_HK.3vsDM.3	2013	-0.0401087	8.90299	0.00402476	0.949568	0.99985	0	Blastocel_Grand_Cru
L1_HK.3vsDM.3	2078	-0.744715	15.1813	4.77266	0.0317457	0.100121	0	Lalvin_CY3079
L1_HK.3vsDM.3	2079	-0.786983	8.40619	1.88475	0.173506	0.330873	0	Enoferm_T306
L1_HK.3vsDM.3	2260	0.571771	14.0344	4.47948	0.0373104	0.109266	0	Lalvin_QA23
L1_HK.3vsDM.3	2308	-0.479451	13.4651	2.74376	0.101425	0.213252	0	Brocksopp_1
L1_HK.3vsDM.3	2776	0.310442	14.5157	0.770599	0.382575	0.615121	0	NT_116
L1_HK.3vsDM.3	2851	0.260068	13.8477	0.740727	0.391917	0.618022	0	Actiflore_Rose
L1_HK.3vsDM.3	2852	0.816487	8.30599	0.64039	0.426251	0.635501	0	Zymaflore_F15
L1_HK.3vsDM.3	2858	2.77023	12.7059	18.842	5.11542e-05	0.000599235	1	Zymaflore_VL1
L1_HK.3vsDM.3	2861	0.065708	11.6719	0.0247632	0.875342	0.996917	0	Zymaflore_X5
L1_HK.3vsDM.3	2863	-2.04726	9.49894	12.8702	0.000564183	0.00420573	-1	Collection_Cepage_Chardonnay
L1_HK.3vsDM.3	2866	-2.24465	9.77145	16.8155	9.58718e-05	0.000982686	-1	Collection_Cepage_Sauvignon_Blanc
L1_HK.3vsDM.3	2867	0.759904	12.1078	2.91724	0.0913891	0.211999	0	Collection_Cepage_Syrah
L1_HK.3vsDM.3	2874	-0.638507	9.99573	1.23715	0.269324	0.490767	0	Fermicru_VR5
L1_HK.3vsDM.3	2878	1.50127	12.3532	15.9042	0.000143167	0.00130441	1	NT_112
L1_HK.3vsDM.3	2880	1.06026	13.2438	8.52364	0.00451563	0.0231426	1	NT_50
L1_HK.3vsDM.3	2881	0.462842	10.1019	0.601796	0.440219	0.641344	0	Vin_2000
L1_HK.3vsDM.3	2910	1.13799	14.617	27.0482	1.41251e-06	3.86085e-05	1	Maurivin_Elegance
L1_HK.3vsDM.3	2913	-0.250836	9.29052	1.05499e-07	0.999742	0.99985	0	Maurivin_Sauvignon
L1_HK.3vsDM.3	2914	-0.428352	13.3443	0.401524	0.528516	0.722072	0	Maurivin_UOA_Maxithiol
L1_LPH.HK.3vsDM.3	81	-0.328733	9.95263	0.422032	0.517725	0.633634	0	X81_Brelez
L1_LPH.HK.3vsDM.3	170	1.29681	9.39183	5.92489	0.0170817	0.0583624	0	Sep_1
L1_LPH.HK.3vsDM.3	213	0.92932	7.93611	0.647002	0.423739	0.57911	0	Tintara_1953
L1_LPH.HK.3vsDM.3	228	-2.04311	18.3341	34.8211	7.65957e-08	3.14042e-06	-1	Stoneyfell_1949
L1_LPH.HK.3vsDM.3	266	-0.56622	8.8149	0.43068	0.513478	0.633634	0	X266
L1_LPH.HK.3vsDM.3	722	1.40675	10.096	6.82065	0.0107877	0.0402085	1	X722
L1_LPH.HK.3vsDM.3	724	-0.770257	9.77442	1.8849	0.17349	0.330841	0	Bright_Tokay6
L1_LPH.HK.3vsDM.3	735	-0.911794	12.3862	4.53051	0.0362716	0.106224	0	Beech_Wadenswil
L1_LPH.HK.3vsDM.3	740	0.431084	9.66885	0.676317	0.413343	0.57911	0	Trier_25
L1_LPH.HK.3vsDM.3	763	-0.138876	10.9029	0.0723471	0.788619	0.850879	0	X763
L1_LPH.HK.3vsDM.3	778	0.696404	10.7951	0.658864	0.419349	0.57911	0	X778
L1_LPH.HK.3vsDM.3	796	-2.17756	19.7582	38.6294	1.9814e-08	1.62475e-06	-1	X796
L1_LPH.HK.3vsDM.3	833	1.05083	8.34981	1.47688	0.227898	0.406252	0	Penfolds_B
L1_LPH.HK.3vsDM.3	838	-0.916906	12.3976	13.0295	0.000524221	0.00307044	-1	X838
L1_LPH.HK.3vsDM.3	896	-1.7013	10.1824	10.7729	0.00151007	0.0068792	-1	X896
L1_LPH.HK.3vsDM.3	934	-2.49223	8.75086	17.5243	7.18179e-05	0.000654341	-1	UCD_48.41
L1_LPH.HK.3vsDM.3	935	0.598934	8.17774	1.75958e-07	0.999667	0.99974	0	UCD_C.9
L1_LPH.HK.3vsDM.3	947	-0.530109	12.9457	1.58327	0.211832	0.387731	0	Beech_729
L1_LPH.HK.3vsDM.3	1001	1.15217	15.141	24.2389	4.28825e-06	5.8606e-05	1	Petaluma_1
L1_LPH.HK.3vsDM.3	1017	-0.343893	12.6032	0.851468	0.358822	0.525418	0	Petaluma_2
L1_LPH.HK.3vsDM.3	1082	1.89413	12.5499	20.7304	1.8012e-05	0.000184623	1	NCYC_761
L1_LPH.HK.3vsDM.3	1427	2.75774	6.96881	2.09555	0.154136	0.308273	0	Lalvin_WSK.27
L1_LPH.HK.3vsDM.3	1429	0.861394	11.9753	8.6523	0.00423607	0.0173679	1	Lalvin_DV10
L1_LPH.HK.3vsDM.3	1432	-1.81305	13.073	6.89786	0.0107399	0.0402085	-1	Vin_7
L1_LPH.HK.3vsDM.3	1436	1.03961	9.71238	4.53563	0.0361691	0.106224	0	Lalvin_S6U
L1_LPH.HK.3vsDM.3	1482	0.905734	9.80313	0.485023	0.488317	0.616031	0	C_Todd_1
L1_LPH.HK.3vsDM.3	1483	-0.0923455	14.5718	0.02378	0.877921	0.91126	0	Lalvin_ICV_D254
L1_LPH.HK.3vsDM.3	1485	0.1777	11.7833	0.090375	0.764543	0.843923	0	Lalvin_RC212
L1_LPH.HK.3vsDM.3	1486	0.655643	13.3648	3.55786	0.0627742	0.165013	0	Lalvin_BM45
L1_LPH.HK.3vsDM.3	1487	-0.644812	13.8163	1.58183	0.212779	0.387731	0	Lalvin_Rhone_L2056
L1_LPH.HK.3vsDM.3	1488	-0.342836	15.6366	1.4126	0.238027	0.406629	0	Lalvin_ICV_D47
L1_LPH.HK.3vsDM.3	1490	0.34261	14.5327	0.256627	0.614153	0.719436	0	Lalvin_Rhone_L2323
L1_LPH.HK.3vsDM.3	1491	0.854644	7.28014	0.53907	0.46518	0.605473	0	Uvaferm_BDX
L1_LPH.HK.3vsDM.3	1493	-0.892741	10.5591	2.48122	0.119225	0.260376	0	Lalvin_71B
L1_LPH.HK.3vsDM.3	1497	0.574654	14.5471	2.08329	0.152901	0.308273	0	Lalvin_T73
L1_LPH.HK.3vsDM.3	1502	0.509932	12.0308	2.45913	0.120662	0.260376	0	Fusion
L1_LPH.HK.3vsDM.3	1503	1.16013	12.5564	11.0679	0.00131212	0.00632906	1	X1503
L1_LPH.HK.3vsDM.3	1504	0.551422	13.3239	3.42839	0.067654	0.16811	0	X1504
L1_LPH.HK.3vsDM.3	1505	-0.336804	10.1875	0.5839	0.446963	0.600835	0	Cerebray
L1_LPH.HK.3vsDM.3	1537	0.359871	12.0957	0.868517	0.354079	0.525418	0	Vin_13
L1_LPH.HK.3vsDM.3	1688	-0.24052	8.966	0.162467	0.687936	0.783482	0	Zymaflore_VL3c
L1_LPH.HK.3vsDM.3	1706	1.08256	15.6907	16.5612	0.000107171	0.000878799	1	unknown
L1_LPH.HK.3vsDM.3	1709	0.250718	9.4519	0.203404	0.653197	0.754397	0	Wolf
L1_LPH.HK.3vsDM.3	1712	1.02626	16.482	11.7044	0.0009713	0.00497791	1	YW8134
L1_LPH.HK.3vsDM.3	1716	1.00509	7.28126	1.18149	0.280371	0.450793	0	Petaluma_1A
L1_LPH.HK.3vsDM.3	1722	-0.547689	8.38292	0.368034	0.54574	0.658098	0	CBS_7045
L1_LPH.HK.3vsDM.3	1729	0.912497	11.7095	2.79002	0.0986339	0.231085	0	YW8003
L1_LPH.HK.3vsDM.3	1736	-0.302062	9.73867	0.327865	0.568473	0.675576	0	YW8154
L1_LPH.HK.3vsDM.3	1742	-0.883513	9.89196	2.47534	0.119463	0.260376	0	YW8205
L1_LPH.HK.3vsDM.3	1756	0.395057	14.3172	0.552627	0.459866	0.605473	0	Morey_St_Denis
L1_LPH.HK.3vsDM.3	1757	-1.04834	9.38624	1.24033	0.268798	0.440829	0	Chateau_d.Yquem
L1_LPH.HK.3vsDM.3	1758	-1.67898	12.8844	28.2923	8.72629e-07	2.38519e-05	-1	Haut.Brion_1
L1_LPH.HK.3vsDM.3	1759	-2.5477	7.9145	14.1784	0.00031012	0.00211915	-1	Chateau_Cantemerle
L1_LPH.HK.3vsDM.3	1760	-0.505327	10.6015	0.86169	0.355968	0.525418	0	Gruaud_Larose
L1_LPH.HK.3vsDM.3	1776	0.827445	9.38875	2.00329	0.160713	0.313773	0	Massey_GF7
L1_LPH.HK.3vsDM.3	1778	0.106568	10.8041	0.0352066	0.851623	0.895296	0	Massey_GF8C
L1_LPH.HK.3vsDM.3	1781	-1.10454	10.9255	3.51367	0.0643952	0.165013	0	YW8316_Yquem
L1_LPH.HK.3vsDM.3	1795	0.320722	15.53	1.43958	0.233633	0.406629	0	Henri.Martin_8130
L1_LPH.HK.3vsDM.3	1796	0.523165	14.2877	4.58342	0.0352271	0.106224	0	YW8413
L1_LPH.HK.3vsDM.3	1833	-1.04014	7.67503	1.06644	0.305175	0.472157	0	Uvaferm_43
L1_LPH.HK.3vsDM.3	1910	-1.84935	13.8458	26.0554	2.08359e-06	3.41708e-05	-1	NCYC_738.1
L1_LPH.HK.3vsDM.3	1918	-1.63382	8.01096	3.90048	0.051692	0.141291	0	DSIR_Wine_Research__R102
L1_LPH.HK.3vsDM.3	2013	0.184472	8.90299	0.0846042	0.771881	0.843923	0	Blastocel_Grand_Cru
L1_LPH.HK.3vsDM.3	2078	-1.31746	15.1813	14.847	0.000229371	0.00170985	-1	Lalvin_CY3079
L1_LPH.HK.3vsDM.3	2079	-1.17304	8.40619	3.93792	0.0505257	0.141291	0	Enoferm_T306
L1_LPH.HK.3vsDM.3	2260	-0.0614112	14.0344	0.0516935	0.820703	0.873996	0	Lalvin_QA23
L1_LPH.HK.3vsDM.3	2308	-0.307306	13.4651	1.12817	0.291258	0.459292	0	Brocksopp_1
L1_LPH.HK.3vsDM.3	2776	0.320053	14.5157	0.818725	0.368182	0.529665	0	NT_116
L1_LPH.HK.3vsDM.3	2851	-0.0137061	13.8477	0.00208033	0.963731	0.987824	0	Actiflore_Rose
L1_LPH.HK.3vsDM.3	2852	-2.61496	8.30599	3.20753	0.077581	0.187107	0	Zymaflore_F15
L1_LPH.HK.3vsDM.3	2858	3.35704	12.7059	27.2404	2.04586e-06	3.41708e-05	1	Zymaflore_VL1
L1_LPH.HK.3vsDM.3	2861	0.296936	11.6719	0.50301	0.480176	0.615225	0	Zymaflore_X5
L1_LPH.HK.3vsDM.3	2863	-2.08984	9.49894	13.1579	0.00049414	0.00307044	-1	Collection_Cepage_Chardonnay
L1_LPH.HK.3vsDM.3	2866	-2.69463	9.77145	23.1463	6.66487e-06	7.80742e-05	-1	Collection_Cepage_Sauvignon_Blanc
L1_LPH.HK.3vsDM.3	2867	0.985614	12.1078	4.9054	0.0295235	0.096837	0	Collection_Cepage_Syrah
L1_LPH.HK.3vsDM.3	2874	0.668765	9.99573	1.38291	0.243063	0.406759	0	Fermicru_VR5
L1_LPH.HK.3vsDM.3	2878	1.11152	12.3532	8.76399	0.00400797	0.0172976	1	NT_112
L1_LPH.HK.3vsDM.3	2880	0.902142	13.2438	6.18356	0.0149059	0.0531429	0	NT_50
L1_LPH.HK.3vsDM.3	2881	0.873477	10.1019	2.09699	0.151562	0.308273	0	Vin_2000
L1_LPH.HK.3vsDM.3	2910	0.775536	14.617	12.5986	0.000639747	0.00349728	1	Maurivin_Elegance
L1_LPH.HK.3vsDM.3	2913	0.580365	9.29052	1.07214e-07	0.99974	0.99974	0	Maurivin_Sauvignon
L1_LPH.HK.3vsDM.3	2914	-0.216636	13.3443	0.102941	0.749353	0.841739	0	Maurivin_UOA_Maxithiol
L1_HS.LYAN.3vsDM.3	81	-0.472378	9.95263	0.863674	0.355418	0.665715	0	X81_Brelez
L1_HS.LYAN.3vsDM.3	170	-0.113504	9.39183	0.0420494	0.83803	0.96816	0	Sep_1
L1_HS.LYAN.3vsDM.3	213	0.40295	7.93611	0.0598663	0.807378	0.96816	0	Tintara_1953
L1_HS.LYAN.3vsDM.3	228	-0.763913	18.3341	4.95669	0.0287096	0.235418	0	Stoneyfell_1949
L1_HS.LYAN.3vsDM.3	266	-0.101193	8.8149	0.0194372	0.889459	0.969414	0	X266
L1_HS.LYAN.3vsDM.3	722	0.374421	10.096	0.457527	0.500765	0.831588	0	X722
L1_HS.LYAN.3vsDM.3	724	-0.614962	9.77442	1.20778	0.274961	0.625578	0	Bright_Tokay6
L1_HS.LYAN.3vsDM.3	735	-0.517937	12.3862	1.47828	0.227504	0.619325	0	Beech_Wadenswil
L1_HS.LYAN.3vsDM.3	740	0.0363042	9.66885	0.00455818	0.946344	0.994874	0	Trier_25
L1_HS.LYAN.3vsDM.3	763	-0.304927	10.9029	0.335211	0.56418	0.889669	0	X763
L1_HS.LYAN.3vsDM.3	778	-0.420737	10.7951	0.183906	0.669181	0.932196	0	X778
L1_HS.LYAN.3vsDM.3	796	-0.322277	19.7582	0.867275	0.354422	0.665715	0	X796
L1_HS.LYAN.3vsDM.3	833	-1.892	8.34981	2.36645	0.12798	0.482847	0	Penfolds_B
L1_HS.LYAN.3vsDM.3	838	-0.278713	12.3976	1.2111	0.274308	0.625578	0	X838
L1_HS.LYAN.3vsDM.3	896	0.132823	10.1824	0.0714066	0.789965	0.96816	0	X896
L1_HS.LYAN.3vsDM.3	934	-1.02188	8.75086	3.08702	0.0827125	0.421411	0	UCD_48.41
L1_HS.LYAN.3vsDM.3	935	0.533383	8.17774	1.75918e-07	0.999667	0.999846	0	UCD_C.9
L1_HS.LYAN.3vsDM.3	947	0.0505488	12.9457	0.0144059	0.904755	0.969414	0	Beech_729
L1_HS.LYAN.3vsDM.3	1001	0.427393	15.141	3.35035	0.0707934	0.414647	0	Petaluma_1
L1_HS.LYAN.3vsDM.3	1017	0.141533	12.6032	0.144491	0.704831	0.932196	0	Petaluma_2
L1_HS.LYAN.3vsDM.3	1082	-0.186405	12.5499	0.198754	0.656894	0.932196	0	NCYC_761
L1_HS.LYAN.3vsDM.3	1427	0.715377	6.96881	3.74387e-08	0.999846	0.999846	0	Lalvin_WSK.27
L1_HS.LYAN.3vsDM.3	1429	0.195335	11.9753	0.443972	0.507066	0.831588	0	Lalvin_DV10
L1_HS.LYAN.3vsDM.3	1432	-1.13477	13.073	2.73654	0.102874	0.421785	0	Vin_7
L1_HS.LYAN.3vsDM.3	1436	0.113445	9.71238	0.0517106	0.820674	0.96816	0	Lalvin_S6U
L1_HS.LYAN.3vsDM.3	1482	1.66704	9.80313	2.3068	0.13303	0.482847	0	C_Todd_1
L1_HS.LYAN.3vsDM.3	1483	0.906446	14.5718	2.28524	0.135433	0.482847	0	Lalvin_ICV_D254
L1_HS.LYAN.3vsDM.3	1485	1.1652	11.7833	3.8817	0.0525511	0.359099	0	Lalvin_RC212
L1_HS.LYAN.3vsDM.3	1486	0.0524385	13.3648	0.0227606	0.880449	0.969414	0	Lalvin_BM45
L1_HS.LYAN.3vsDM.3	1487	0.150251	13.8163	0.0861672	0.769997	0.96816	0	Lalvin_Rhone_L2056
L1_HS.LYAN.3vsDM.3	1488	-0.307186	15.6366	1.13457	0.289902	0.625578	0	Lalvin_ICV_D47
L1_HS.LYAN.3vsDM.3	1490	0.476944	14.5327	0.496916	0.483364	0.825748	0	Lalvin_Rhone_L2323
L1_HS.LYAN.3vsDM.3	1491	0.258027	7.28014	0.0404463	0.841172	0.96816	0	Uvaferm_BDX
L1_HS.LYAN.3vsDM.3	1493	-0.269327	10.5591	0.238771	0.626454	0.932196	0	Lalvin_71B
L1_HS.LYAN.3vsDM.3	1497	0.925089	14.5471	5.38486	0.0229119	0.235418	0	Lalvin_T73
L1_HS.LYAN.3vsDM.3	1502	0.978038	12.0308	9.04597	0.00348716	0.0633956	0	Fusion
L1_HS.LYAN.3vsDM.3	1503	1.23046	12.5564	12.4011	0.000701216	0.0287499	1	X1503
L1_HS.LYAN.3vsDM.3	1504	0.550852	13.3239	3.41187	0.0683057	0.414647	0	X1504
L1_HS.LYAN.3vsDM.3	1505	-0.339996	10.1875	0.581517	0.447888	0.798409	0	Cerebray
L1_HS.LYAN.3vsDM.3	1537	0.522643	12.0957	1.82793	0.180058	0.565734	0	Vin_13
L1_HS.LYAN.3vsDM.3	1688	-0.702639	8.966	1.34644	0.249241	0.619325	0	Zymaflore_VL3c
L1_HS.LYAN.3vsDM.3	1706	0.444562	15.6907	2.8054	0.0977254	0.421762	0	unknown
L1_HS.LYAN.3vsDM.3	1709	-0.220674	9.4519	0.153337	0.696398	0.932196	0	Wolf
L1_HS.LYAN.3vsDM.3	1712	0.53639	16.482	3.20857	0.076912	0.420453	0	YW8134
L1_HS.LYAN.3vsDM.3	1716	-0.179558	7.28126	0.0333522	0.855561	0.96816	0	Petaluma_1A
L1_HS.LYAN.3vsDM.3	1722	-1.21655	8.38292	1.3548	0.247787	0.619325	0	CBS_7045
L1_HS.LYAN.3vsDM.3	1729	0.153133	11.7095	0.0708758	0.790728	0.96816	0	YW8003
L1_HS.LYAN.3vsDM.3	1736	-0.208031	9.73867	0.153866	0.695877	0.932196	0	YW8154
L1_HS.LYAN.3vsDM.3	1742	-0.752234	9.89196	1.77619	0.186278	0.565734	0	YW8205
L1_HS.LYAN.3vsDM.3	1756	0.576201	14.3172	1.17472	0.282349	0.625578	0	Morey_St_Denis
L1_HS.LYAN.3vsDM.3	1757	0.328826	9.38624	0.149478	0.700078	0.932196	0	Chateau_d.Yquem
L1_HS.LYAN.3vsDM.3	1758	0.171116	12.8844	0.298871	0.586063	0.906739	0	Haut.Brion_1
L1_HS.LYAN.3vsDM.3	1759	-0.827023	7.9145	1.68886	0.197362	0.57799	0	Chateau_Cantemerle
L1_HS.LYAN.3vsDM.3	1760	-0.0945554	10.6015	0.0304503	0.861899	0.96816	0	Gruaud_Larose
L1_HS.LYAN.3vsDM.3	1776	-0.674838	9.38875	1.20795	0.274928	0.625578	0	Massey_GF7
L1_HS.LYAN.3vsDM.3	1778	-0.157803	10.8041	0.0776328	0.781227	0.96816	0	Massey_GF8C
L1_HS.LYAN.3vsDM.3	1781	-0.433229	10.9255	0.553728	0.458908	0.800648	0	YW8316_Yquem
L1_HS.LYAN.3vsDM.3	1795	0.249714	15.53	0.872393	0.353013	0.665715	0	Henri.Martin_8130
L1_HS.LYAN.3vsDM.3	1796	0.347729	14.2877	2.02392	0.1586	0.520209	0	YW8413
L1_HS.LYAN.3vsDM.3	1833	-0.167297	7.67503	0.0334779	0.855331	0.96816	0	Uvaferm_43
L1_HS.LYAN.3vsDM.3	1910	0.0186827	13.8458	0.00270957	0.958612	0.995015	0	NCYC_738.1
L1_HS.LYAN.3vsDM.3	1918	1.49053	8.01096	5.34205	0.0233687	0.235418	0	DSIR_Wine_Research__R102
L1_HS.LYAN.3vsDM.3	2013	-0.0713672	8.90299	0.0127693	0.910303	0.969414	0	Blastocel_Grand_Cru
L1_HS.LYAN.3vsDM.3	2078	-0.355963	15.1813	1.09328	0.298792	0.628228	0	Lalvin_CY3079
L1_HS.LYAN.3vsDM.3	2079	-1.00729	8.40619	2.89458	0.0926352	0.421762	0	Enoferm_T306
L1_HS.LYAN.3vsDM.3	2260	0.250212	14.0344	0.857217	0.357213	0.665715	0	Lalvin_QA23
L1_HS.LYAN.3vsDM.3	2308	0.272604	13.4651	0.887077	0.349014	0.665715	0	Brocksopp_1
L1_HS.LYAN.3vsDM.3	2776	0.416526	14.5157	1.38572	0.242507	0.619325	0	NT_116
L1_HS.LYAN.3vsDM.3	2851	0.00488903	13.8477	0.000252147	0.987369	0.999846	0	Actiflore_Rose
L1_HS.LYAN.3vsDM.3	2852	1.72198	8.30599	3.00504	0.0873656	0.421411	0	Zymaflore_F15
L1_HS.LYAN.3vsDM.3	2858	2.91697	12.7059	20.7593	2.37652e-05	0.00194875	1	Zymaflore_VL1
L1_HS.LYAN.3vsDM.3	2861	1.32896	11.6719	9.97881	0.00221178	0.0604554	0	Zymaflore_X5
L1_HS.LYAN.3vsDM.3	2863	-1.26833	9.49894	5.05538	0.0272098	0.235418	0	Collection_Cepage_Chardonnay
L1_HS.LYAN.3vsDM.3	2866	-1.11588	9.77145	4.24979	0.0423963	0.316045	0	Collection_Cepage_Sauvignon_Blanc
L1_HS.LYAN.3vsDM.3	2867	0.654954	12.1078	2.16544	0.14494	0.495212	0	Collection_Cepage_Syrah
L1_HS.LYAN.3vsDM.3	2874	-0.278588	9.99573	0.232172	0.631223	0.932196	0	Fermicru_VR5
L1_HS.LYAN.3vsDM.3	2878	0.172317	12.3532	0.210743	0.64739	0.932196	0	NT_112
L1_HS.LYAN.3vsDM.3	2880	0.98331	13.2438	7.33648	0.0082103	0.112207	0	NT_50
L1_HS.LYAN.3vsDM.3	2881	0.535752	10.1019	0.772128	0.382235	0.696517	0	Vin_2000
L1_HS.LYAN.3vsDM.3	2910	0.649461	14.617	8.83712	0.00386559	0.0633956	0	Maurivin_Elegance
L1_HS.LYAN.3vsDM.3	2913	2.19111	9.29052	1.61931	0.208571	0.589752	0	Maurivin_Sauvignon
L1_HS.LYAN.3vsDM.3	2914	0.402607	13.3443	0.355737	0.552945	0.889049	0	Maurivin_UOA_Maxithiol
L2_HCu.3vsDM.3	81	2.48787	9.5504	30.2937	3.06263e-07	7.64268e-07	1	X81_Brelez
L2_HCu.3vsDM.3	170	1.82574	8.26641	15.9879	0.000124909	0.000209031	1	Sep_1
L2_HCu.3vsDM.3	213	1.04358	6.35333	3.93808	0.050108	0.0622554	0	Tintara_1953
L2_HCu.3vsDM.3	228	3.68765	24.5399	54.27	5.95036e-11	2.71072e-10	1	Stoneyfell_1949
L2_HCu.3vsDM.3	266	3.50488	7.19845	50.1064	2.55349e-10	9.97075e-10	1	X266
L2_HCu.3vsDM.3	722	-1.27978	8.67483	9.03071	0.00341732	0.00486462	-1	X722
L2_HCu.3vsDM.3	724	3.14748	9.20839	28.9172	6.65415e-07	1.4747e-06	1	Bright_Tokay6
L2_HCu.3vsDM.3	735	3.16412	10.9652	56.5881	2.81487e-11	1.5388e-10	1	Beech_Wadenswil
L2_HCu.3vsDM.3	740	-1.66475	8.41234	13.4923	0.00040121	0.000657985	-1	Trier_25
L2_HCu.3vsDM.3	763	-1.02168	9.19831	4.36129	0.0394001	0.0497048	-1	X763
L2_HCu.3vsDM.3	778	-1.62359	8.86784	5.43716	0.0217944	0.0283673	-1	X778
L2_HCu.3vsDM.3	796	4.59426	21.5357	82.9231	1.19779e-14	9.82185e-14	1	X796
L2_HCu.3vsDM.3	833	0.607577	7.04771	1.09374	0.298373	0.335158	0	Penfolds_B
L2_HCu.3vsDM.3	838	1.21841	11.7858	13.1984	0.000451405	0.000711831	1	X838
L2_HCu.3vsDM.3	896	-0.167948	9.47742	0.152561	0.696962	0.723429	0	X896
L2_HCu.3vsDM.3	934	0.29434	8.56366	0.352873	0.553883	0.582287	0	UCD_48.41
L2_HCu.3vsDM.3	935	-1.82457	6.29785	0.383896	0.537471	0.573397	0	UCD_C.9
L2_HCu.3vsDM.3	947	-1.82507	11.4018	20.1725	1.96436e-05	3.50168e-05	-1	Beech_729
L2_HCu.3vsDM.3	1001	2.28469	14.4081	40.7933	5.96058e-09	1.81025e-08	1	Petaluma_1
L2_HCu.3vsDM.3	1017	-0.658114	11.6835	3.54372	0.0627869	0.0746163	0	Petaluma_2
L2_HCu.3vsDM.3	1082	0.269196	11.4201	0.526306	0.469921	0.513781	0	NCYC_761
L2_HCu.3vsDM.3	1427	-1.73222	5.90529	0.381798	0.538433	0.573397	0	Lalvin_WSK.27
L2_HCu.3vsDM.3	1429	2.4175	11.2899	42.7292	2.98797e-09	9.80055e-09	1	Lalvin_DV10
L2_HCu.3vsDM.3	1432	4.09969	17.1976	28.3062	1.34124e-06	2.89426e-06	1	Vin_7
L2_HCu.3vsDM.3	1436	-0.340936	9.00798	0.683192	0.410531	0.454913	0	Lalvin_S6U
L2_HCu.3vsDM.3	1482	-3.3638	8.32438	10.7675	0.00144842	0.00215946	-1	C_Todd_1
L2_HCu.3vsDM.3	1483	-5.7831	12.8932	159.516	7.12938e-22	1.46152e-20	-1	Lalvin_ICV_D254
L2_HCu.3vsDM.3	1485	-5.9291	10.5647	130.914	1.17025e-19	1.91922e-18	-1	Lalvin_RC212
L2_HCu.3vsDM.3	1486	-2.01751	11.7848	30.2149	3.15875e-07	7.64268e-07	-1	Lalvin_BM45
L2_HCu.3vsDM.3	1487	-2.14481	12.3208	43.3789	2.37531e-09	8.11564e-09	-1	Lalvin_Rhone_L2056
L2_HCu.3vsDM.3	1488	-0.121941	14.2648	0.0798313	0.778159	0.787766	0	Lalvin_ICV_D47
L2_HCu.3vsDM.3	1490	-6.60706	12.6662	91.3893	4.67648e-14	3.1956e-13	-1	Lalvin_Rhone_L2323
L2_HCu.3vsDM.3	1491	-8.41549	6.31971	24.3069	4.02857e-06	8.25856e-06	-1	Uvaferm_BDX
L2_HCu.3vsDM.3	1493	-2.65661	8.69811	29.0034	5.09405e-07	1.16031e-06	-1	Lalvin_71B
L2_HCu.3vsDM.3	1497	-1.9738	12.8887	22.8201	6.36599e-06	1.24288e-05	-1	Lalvin_T73
L2_HCu.3vsDM.3	1502	1.54878	9.63531	10.8518	0.00138133	0.00209758	1	Fusion
L2_HCu.3vsDM.3	1503	1.94554	11.669	32.2178	1.44945e-07	3.83403e-07	1	X1503
L2_HCu.3vsDM.3	1504	0.96263	12.3406	8.99719	0.00344083	0.00486462	1	X1504
L2_HCu.3vsDM.3	1505	2.15074	9.20822	33.7889	7.94106e-08	2.17056e-07	1	Cerebray
L2_HCu.3vsDM.3	1537	-7.35762	10.8618	249.799	1.6389e-28	6.71949e-27	-1	Vin_13
L2_HCu.3vsDM.3	1688	-1.18031	8.44622	7.28097	0.00822858	0.0110614	-1	Zymaflore_VL3c
L2_HCu.3vsDM.3	1706	1.40407	14.1311	4.70082	0.0337767	0.0432764	1	unknown
L2_HCu.3vsDM.3	1709	0.699849	9.23605	2.40523	0.124207	0.143451	0	Wolf
L2_HCu.3vsDM.3	1712	2.47822	18.9672	29.5274	4.14014e-07	9.69976e-07	1	YW8134
L2_HCu.3vsDM.3	1716	2.04996	5.7749	19.0854	3.26394e-05	5.69453e-05	1	Petaluma_1A
L2_HCu.3vsDM.3	1722	-3.4872	6.74579	9.40612	0.00288719	0.00422767	-1	CBS_7045
L2_HCu.3vsDM.3	1729	-4.62817	9.97044	48.9944	3.42248e-10	1.27565e-09	-1	YW8003
L2_HCu.3vsDM.3	1736	0.1271	9.42315	0.100479	0.751955	0.770754	0	YW8154
L2_HCu.3vsDM.3	1742	2.54854	9.70737	19.0169	3.64951e-05	6.23457e-05	1	YW8205
L2_HCu.3vsDM.3	1756	-6.79873	12.5957	280.011	2.86159e-30	2.34651e-28	-1	Morey_St_Denis
L2_HCu.3vsDM.3	1757	-4.1094	7.69101	30.5056	3.16891e-07	7.64268e-07	-1	Chateau_d.Yquem
L2_HCu.3vsDM.3	1758	-1.98974	11.3896	20.5121	1.79113e-05	3.26384e-05	-1	Haut.Brion_1
L2_HCu.3vsDM.3	1759	-1.01369	7.27326	3.55393	0.0624163	0.0746163	0	Chateau_Cantemerle
L2_HCu.3vsDM.3	1760	3.09106	12.8128	27.446	1.78621e-06	3.75561e-06	1	Gruaud_Larose
L2_HCu.3vsDM.3	1776	1.22626	8.2697	6.8225	0.0104414	0.0138095	1	Massey_GF7
L2_HCu.3vsDM.3	1778	-1.37784	9.98865	8.51775	0.00437718	0.00608353	-1	Massey_GF8C
L2_HCu.3vsDM.3	1781	-5.03152	9.72901	79.8157	2.80941e-14	2.09429e-13	-1	YW8316_Yquem
L2_HCu.3vsDM.3	1795	2.65899	17.0266	50.691	1.93583e-10	7.93692e-10	1	Henri.Martin_8130
L2_HCu.3vsDM.3	1796	2.17505	13.7174	38.4877	1.37553e-08	4.02834e-08	1	YW8413
L2_HCu.3vsDM.3	1833	-5.30256	6.76672	23.1642	5.77784e-06	1.15557e-05	-1	Uvaferm_43
L2_HCu.3vsDM.3	1910	3.03728	18.5303	41.5172	4.59846e-09	1.45028e-08	1	NCYC_738.1
L2_HCu.3vsDM.3	1918	-5.16804	7.36769	36.3509	3.20687e-08	9.06769e-08	-1	DSIR_Wine_Research__R102
L2_HCu.3vsDM.3	2013	-0.755443	8.44571	2.96328	0.0883826	0.103534	0	Blastocel_Grand_Cru
L2_HCu.3vsDM.3	2078	-1.56081	13.5547	20.7175	1.55334e-05	2.89485e-05	-1	Lalvin_CY3079
L2_HCu.3vsDM.3	2079	-1.31469	7.66504	7.44251	0.00757056	0.0103464	-1	Enoferm_T306
L2_HCu.3vsDM.3	2260	2.71695	13.8338	52.9368	9.20203e-11	3.9714e-10	1	Lalvin_QA23
L2_HCu.3vsDM.3	2308	-2.57271	11.9837	56.6661	2.74544e-11	1.5388e-10	-1	Brocksopp_1
L2_HCu.3vsDM.3	2776	-5.06028	12.7079	106.74	1.23893e-16	1.26991e-15	-1	NT_116
L2_HCu.3vsDM.3	2851	-3.03766	13.0713	56.1506	3.23906e-11	1.66002e-10	-1	Actiflore_Rose
L2_HCu.3vsDM.3	2852	-3.28633	7.4168	13.2434	0.000450471	0.000711831	-1	Zymaflore_F15
L2_HCu.3vsDM.3	2858	-6.19052	11.3791	199.419	3.31913e-25	9.0723e-24	-1	Zymaflore_VL1
L2_HCu.3vsDM.3	2861	-4.7089	11.2167	128.857	1.81979e-19	2.48704e-18	-1	Zymaflore_X5
L2_HCu.3vsDM.3	2863	-4.0869	8.58421	58.4828	1.5401e-11	9.71448e-11	-1	Collection_Cepage_Chardonnay
L2_HCu.3vsDM.3	2866	3.20734	13.0298	21.9438	1.45743e-05	2.77929e-05	1	Collection_Cepage_Sauvignon_Blanc
L2_HCu.3vsDM.3	2867	-1.13814	11.2605	11.3321	0.00109526	0.00169456	-1	Collection_Cepage_Syrah
L2_HCu.3vsDM.3	2874	-6.0389	8.78643	98.6363	2.00167e-16	1.82375e-15	-1	Fermicru_VR5
L2_HCu.3vsDM.3	2878	-0.689789	10.9077	3.68283	0.057933	0.070903	0	NT_112
L2_HCu.3vsDM.3	2880	2.04672	12.3641	45.8813	9.91823e-10	3.53607e-09	1	NT_50
L2_HCu.3vsDM.3	2881	-6.44302	8.912	102.235	1.02092e-16	1.19594e-15	-1	Vin_2000
L2_HCu.3vsDM.3	2910	2.53513	13.8444	55.5396	3.94323e-11	1.90203e-10	1	Maurivin_Elegance
L2_HCu.3vsDM.3	2913	-0.242106	7.0017	1.01292e-07	0.999747	0.999747	0	Maurivin_Sauvignon
L2_HCu.3vsDM.3	2914	-0.453294	11.627	1.60245	0.208607	0.23758	0	Maurivin_UOA_Maxithiol
L2_DM.3vsDM.1	81	-1.09489	9.5504	11.8085	0.000871544	0.00142933	-1	X81_Brelez
L2_DM.3vsDM.1	170	-2.84705	8.26641	69.8833	4.77119e-13	2.17354e-12	-1	Sep_1
L2_DM.3vsDM.1	213	-5.19772	6.35333	202.811	3.047e-25	4.16423e-24	-1	Tintara_1953
L2_DM.3vsDM.1	228	0.439903	24.5399	1.63928	0.203496	0.225496	0	Stoneyfell_1949
L2_DM.3vsDM.1	266	-4.13674	7.19845	116.644	3.51979e-18	2.06159e-17	-1	X266
L2_DM.3vsDM.1	722	-2.20342	8.67483	52.733	1.17603e-10	4.19282e-10	-1	X722
L2_DM.3vsDM.1	724	-1.52495	9.20839	13.585	0.000402585	0.000673714	-1	Bright_Tokay6
L2_DM.3vsDM.1	735	-3.89473	10.9652	142.654	1.01558e-20	8.32779e-20	-1	Beech_Wadenswil
L2_DM.3vsDM.1	740	-1.78866	8.41234	31.9372	1.75424e-07	4.49523e-07	-1	Trier_25
L2_DM.3vsDM.1	763	-3.41974	9.19831	88.2103	2.90595e-15	1.58858e-14	-1	X763
L2_DM.3vsDM.1	778	-6.89767	8.86784	260.313	3.85348e-29	3.15985e-27	-1	X778
L2_DM.3vsDM.1	796	-0.324152	21.5357	0.905926	0.343578	0.365888	0	X796
L2_DM.3vsDM.1	833	-4.61119	7.04771	120.431	1.98023e-18	1.24907e-17	-1	Penfolds_B
L2_DM.3vsDM.1	838	-1.02962	11.7858	18.6225	3.85885e-05	7.53395e-05	-1	X838
L2_DM.3vsDM.1	896	-1.12313	9.47742	13.4491	0.000401416	0.000673714	-1	X896
L2_DM.3vsDM.1	934	-0.594643	8.56366	2.89512	0.0920713	0.106336	0	UCD_48.41
L2_DM.3vsDM.1	935	-10.4338	6.29785	283.48	9.62021e-27	1.97214e-25	-1	UCD_C.9
L2_DM.3vsDM.1	947	-0.0583635	11.4018	0.0421367	0.837792	0.848135	0	Beech_729
L2_DM.3vsDM.1	1001	-0.659928	14.4081	6.92232	0.00991168	0.013109	-1	Petaluma_1
L2_DM.3vsDM.1	1017	-0.0567882	11.6835	0.0529988	0.818413	0.848135	0	Petaluma_2
L2_DM.3vsDM.1	1082	-3.37163	11.4201	138.306	2.47506e-20	1.84504e-19	-1	NCYC_761
L2_DM.3vsDM.1	1427	-10.0003	5.90529	273.614	2.74171e-27	7.494e-26	-1	Lalvin_WSK.27
L2_DM.3vsDM.1	1429	-1.31734	11.2899	25.2496	2.31669e-06	4.99918e-06	-1	Lalvin_DV10
L2_DM.3vsDM.1	1432	-0.029823	17.1976	0.00323464	0.954818	0.954818	0	Vin_7
L2_DM.3vsDM.1	1436	-1.47942	9.00798	25.1752	2.38863e-06	5.02224e-06	-1	Lalvin_S6U
L2_DM.3vsDM.1	1482	-6.66152	8.32438	204.045	2.50332e-25	4.10544e-24	-1	C_Todd_1
L2_DM.3vsDM.1	1483	-0.757305	12.8932	6.39547	0.0131276	0.0170868	-1	Lalvin_ICV_D254
L2_DM.3vsDM.1	1485	-0.987812	10.5647	9.49131	0.00269067	0.00401558	-1	Lalvin_RC212
L2_DM.3vsDM.1	1486	0.796285	11.7848	9.52479	0.00264641	0.00401558	1	Lalvin_BM45
L2_DM.3vsDM.1	1487	0.857051	12.3208	13.9989	0.000310759	0.000542176	1	Lalvin_Rhone_L2056
L2_DM.3vsDM.1	1488	0.895697	14.2648	8.48257	0.00449688	0.00624991	1	Lalvin_ICV_D47
L2_DM.3vsDM.1	1490	0.710876	12.6662	2.59817	0.111783	0.127309	0	Lalvin_Rhone_L2323
L2_DM.3vsDM.1	1491	-3.49677	6.31971	68.5393	1.56905e-12	6.4331e-12	-1	Uvaferm_BDX
L2_DM.3vsDM.1	1493	-2.75126	8.69811	67.3911	9.98028e-13	4.30728e-12	-1	Lalvin_71B
L2_DM.3vsDM.1	1497	1.31492	12.8887	20.0025	2.11667e-05	4.23334e-05	1	Lalvin_T73
L2_DM.3vsDM.1	1502	-1.90546	9.63531	31.2164	2.13602e-07	5.30768e-07	-1	Fusion
L2_DM.3vsDM.1	1503	-0.544823	11.669	5.1192	0.025907	0.0317071	-1	X1503
L2_DM.3vsDM.1	1504	-1.41072	12.3406	37.409	2.04499e-08	5.98889e-08	-1	X1504
L2_DM.3vsDM.1	1505	-2.47285	9.20822	82.401	1.3808e-14	7.07659e-14	-1	Cerebray
L2_DM.3vsDM.1	1537	-0.586121	10.8618	4.7777	0.0312521	0.0376863	-1	Vin_13
L2_DM.3vsDM.1	1688	-0.854324	8.44622	7.85605	0.00612374	0.00836911	-1	Zymaflore_VL3c
L2_DM.3vsDM.1	1706	0.900464	14.1311	3.84329	0.0541898	0.0643995	0	unknown
L2_DM.3vsDM.1	1709	-0.986638	9.23605	9.46773	0.00272231	0.00401558	-1	Wolf
L2_DM.3vsDM.1	1712	0.800949	18.9672	6.27478	0.0139241	0.0178402	1	YW8134
L2_DM.3vsDM.1	1716	-4.03636	5.7749	138.866	4.14516e-20	2.83252e-19	-1	Petaluma_1A
L2_DM.3vsDM.1	1722	-5.91111	6.74579	203.971	1.83846e-24	2.15362e-23	-1	CBS_7045
L2_DM.3vsDM.1	1729	-4.83622	9.97044	143.345	8.82788e-21	8.04318e-20	-1	YW8003
L2_DM.3vsDM.1	1736	-0.867257	9.42315	9.31168	0.00295665	0.00418009	-1	YW8154
L2_DM.3vsDM.1	1742	-2.40324	9.70737	31.5577	2.44548e-07	5.89791e-07	-1	YW8205
L2_DM.3vsDM.1	1756	1.11699	12.5957	18.3023	4.44262e-05	8.47196e-05	1	Morey_St_Denis
L2_DM.3vsDM.1	1757	-3.17544	7.69101	60.5403	1.12461e-11	4.39135e-11	-1	Chateau_d.Yquem
L2_DM.3vsDM.1	1758	1.32735	11.3896	18.0658	5.15192e-05	9.6013e-05	1	Haut.Brion_1
L2_DM.3vsDM.1	1759	0.371584	7.27326	1.00246	0.319224	0.349018	0	Chateau_Cantemerle
L2_DM.3vsDM.1	1760	-0.643834	12.8128	2.46952	0.120817	0.135712	0	Gruaud_Larose
L2_DM.3vsDM.1	1776	-1.82084	8.2697	28.8407	5.43392e-07	1.23773e-06	-1	Massey_GF7
L2_DM.3vsDM.1	1778	-1.27409	9.98865	14.5295	0.00024315	0.000433441	-1	Massey_GF8C
L2_DM.3vsDM.1	1781	-1.99516	9.72901	32.0136	1.56831e-07	4.14843e-07	-1	YW8316_Yquem
L2_DM.3vsDM.1	1795	-0.639204	17.0266	6.01277	0.0160017	0.0201868	-1	Henri.Martin_8130
L2_DM.3vsDM.1	1796	-0.77487	13.7174	9.88043	0.00222017	0.00350103	-1	YW8413
L2_DM.3vsDM.1	1833	-3.73818	6.76672	83.353	1.49404e-14	7.20655e-14	-1	Uvaferm_43
L2_DM.3vsDM.1	1910	0.117202	18.5303	0.129135	0.720117	0.757046	0	NCYC_738.1
L2_DM.3vsDM.1	1918	-2.55872	7.36769	38.6201	1.3961e-08	4.24002e-08	-1	DSIR_Wine_Research__R102
L2_DM.3vsDM.1	2013	-1.03954	8.44571	11.478	0.0010211	0.00164176	-1	Blastocel_Grand_Cru
L2_DM.3vsDM.1	2078	1.67933	13.5547	46.0664	9.30372e-10	3.05162e-09	1	Lalvin_CY3079
L2_DM.3vsDM.1	2079	-0.623212	7.66504	3.58706	0.0612292	0.0717257	0	Enoferm_T306
L2_DM.3vsDM.1	2260	-0.72419	13.8338	7.71291	0.00658888	0.00885718	-1	Lalvin_QA23
L2_DM.3vsDM.1	2308	1.26081	11.9837	27.361	9.81915e-07	2.17614e-06	1	Brocksopp_1
L2_DM.3vsDM.1	2776	-0.782347	12.7079	5.77317	0.0184716	0.0229495	-1	NT_116
L2_DM.3vsDM.1	2851	1.89962	13.0713	43.0305	2.68592e-09	8.47099e-09	1	Actiflore_Rose
L2_DM.3vsDM.1	2852	-5.21845	7.4168	148.356	6.38496e-21	6.54458e-20	-1	Zymaflore_F15
L2_DM.3vsDM.1	2858	-1.15339	11.3791	17.7737	5.61224e-05	0.000102267	-1	Zymaflore_VL1
L2_DM.3vsDM.1	2861	-0.843584	11.2167	9.45294	0.00274235	0.00401558	-1	Zymaflore_X5
L2_DM.3vsDM.1	2863	-1.79759	8.58421	29.2659	4.591e-07	1.07561e-06	-1	Collection_Cepage_Chardonnay
L2_DM.3vsDM.1	2866	-0.467714	13.0298	0.973883	0.327336	0.353178	0	Collection_Cepage_Sauvignon_Blanc
L2_DM.3vsDM.1	2867	-0.0492741	11.2605	0.0429524	0.836252	0.848135	0	Collection_Cepage_Syrah
L2_DM.3vsDM.1	2874	-1.87087	8.78643	33.1843	1.00009e-07	2.73358e-07	-1	Fermicru_VR5
L2_DM.3vsDM.1	2878	-1.49515	10.9077	33.5572	8.67374e-08	2.45258e-07	-1	NT_112
L2_DM.3vsDM.1	2880	-1.62217	12.3641	55.982	3.41942e-11	1.27451e-10	-1	NT_50
L2_DM.3vsDM.1	2881	-2.29603	8.912	50.3484	2.35603e-10	8.04978e-10	-1	Vin_2000
L2_DM.3vsDM.1	2910	-1.1164	13.8444	21.6886	1.02572e-05	2.10272e-05	-1	Maurivin_Elegance
L2_DM.3vsDM.1	2913	-12.6191	7.0017	278.015	3.91637e-28	1.60571e-26	-1	Maurivin_Sauvignon
L2_DM.3vsDM.1	2914	0.776277	11.627	9.30943	0.00294488	0.00418009	1	Maurivin_UOA_Maxithiol
L2_LpH.3vsDM.3	81	0.583416	9.5504	1.71163	0.193885	0.481774	0	X81_Brelez
L2_LpH.3vsDM.3	170	1.08929	8.26641	5.80074	0.0179203	0.157664	0	Sep_1
L2_LpH.3vsDM.3	213	1.60534	6.35333	11.8415	0.000864564	0.0177236	1	Tintara_1953
L2_LpH.3vsDM.3	228	-0.389017	24.5399	0.64296	0.424613	0.693467	0	Stoneyfell_1949
L2_LpH.3vsDM.3	266	0.845342	7.19845	2.96571	0.088322	0.411436	0	X266
L2_LpH.3vsDM.3	722	0.685782	8.67483	2.77504	0.0991313	0.411436	0	X722
L2_LpH.3vsDM.3	724	0.34021	9.20839	0.351893	0.554635	0.745575	0	Bright_Tokay6
L2_LpH.3vsDM.3	735	0.346063	10.9652	0.707024	0.402514	0.693467	0	Beech_Wadenswil
L2_LpH.3vsDM.3	740	-0.441158	8.41234	1.0228	0.314497	0.614018	0	Trier_25
L2_LpH.3vsDM.3	763	0.345282	9.19831	0.537789	0.46513	0.693467	0	X763
L2_LpH.3vsDM.3	778	0.539878	8.86784	1.17168	0.281756	0.563511	0	X778
L2_LpH.3vsDM.3	796	0.149443	21.5357	0.0964662	0.756783	0.881285	0	X796
L2_LpH.3vsDM.3	833	0.348405	7.04771	0.41999	0.518549	0.73103	0	Penfolds_B
L2_LpH.3vsDM.3	838	0.522716	11.7858	2.44644	0.121069	0.411436	0	X838
L2_LpH.3vsDM.3	896	-0.850836	9.47742	3.92831	0.0503268	0.33865	0	X896
L2_LpH.3vsDM.3	934	-0.219952	8.56366	0.198724	0.656752	0.830972	0	UCD_48.41
L2_LpH.3vsDM.3	935	-1.36578	6.29785	0.884575	0.350079	0.65242	0	UCD_C.9
L2_LpH.3vsDM.3	947	-0.105216	11.4018	0.0684553	0.794158	0.881285	0	Beech_729
L2_LpH.3vsDM.3	1001	0.537218	14.4081	2.31019	0.131802	0.411436	0	Petaluma_1
L2_LpH.3vsDM.3	1017	-0.276032	11.6835	0.625795	0.430844	0.693467	0	Petaluma_2
L2_LpH.3vsDM.3	1082	0.152581	11.4201	0.169981	0.681044	0.837459	0	NCYC_761
L2_LpH.3vsDM.3	1427	1.00548	5.90529	0.543763	0.463078	0.693467	0	Lalvin_WSK.27
L2_LpH.3vsDM.3	1429	1.02731	11.2899	7.89937	0.00598978	0.0804112	0	Lalvin_DV10
L2_LpH.3vsDM.3	1432	-0.0456951	17.1976	0.00379588	0.95106	0.95106	0	Vin_7
L2_LpH.3vsDM.3	1436	0.676515	9.00798	2.73467	0.101445	0.411436	0	Lalvin_S6U
L2_LpH.3vsDM.3	1482	0.0803559	8.32438	0.0193788	0.889582	0.935202	0	C_Todd_1
L2_LpH.3vsDM.3	1483	-1.03515	12.8932	6.00937	0.0161009	0.157664	0	Lalvin_ICV_D254
L2_LpH.3vsDM.3	1485	-0.830175	10.5647	3.40153	0.0682069	0.399497	0	Lalvin_RC212
L2_LpH.3vsDM.3	1486	0.323406	11.7848	0.794975	0.37482	0.683005	0	Lalvin_BM45
L2_LpH.3vsDM.3	1487	-1.3417	12.3208	17.2433	7.10552e-05	0.00582653	-1	Lalvin_Rhone_L2056
L2_LpH.3vsDM.3	1488	0.191241	14.2648	0.196379	0.658697	0.830972	0	Lalvin_ICV_D47
L2_LpH.3vsDM.3	1490	-0.040982	12.6662	0.0043606	0.947551	0.95106	0	Lalvin_Rhone_L2323
L2_LpH.3vsDM.3	1491	-0.77165	6.31971	1.78126	0.185565	0.481774	0	Uvaferm_BDX
L2_LpH.3vsDM.3	1493	-0.55859	8.69811	1.55847	0.214913	0.50351	0	Lalvin_71B
L2_LpH.3vsDM.3	1497	0.125389	12.8887	0.0940132	0.759798	0.881285	0	Lalvin_T73
L2_LpH.3vsDM.3	1502	0.616173	9.63531	1.73976	0.190293	0.481774	0	Fusion
L2_LpH.3vsDM.3	1503	0.138517	11.669	0.166367	0.684265	0.837459	0	X1503
L2_LpH.3vsDM.3	1504	0.304908	12.3406	0.907186	0.343244	0.65242	0	X1504
L2_LpH.3vsDM.3	1505	0.277361	9.20822	0.574386	0.45037	0.693467	0	Cerebray
L2_LpH.3vsDM.3	1537	0.280877	10.8618	0.551997	0.459309	0.693467	0	Vin_13
L2_LpH.3vsDM.3	1688	0.491075	8.44622	1.31403	0.254503	0.563511	0	Zymaflore_VL3c
L2_LpH.3vsDM.3	1706	0.713528	14.1311	1.22286	0.272834	0.563511	0	unknown
L2_LpH.3vsDM.3	1709	0.287882	9.23605	0.410085	0.523446	0.73103	0	Wolf
L2_LpH.3vsDM.3	1712	0.709784	18.9672	2.48895	0.117924	0.411436	0	YW8134
L2_LpH.3vsDM.3	1716	1.24608	5.7749	7.64752	0.00686437	0.0804112	0	Petaluma_1A
L2_LpH.3vsDM.3	1722	1.7957	6.74579	12.1782	0.000763481	0.0177236	1	CBS_7045
L2_LpH.3vsDM.3	1729	0.591133	9.97044	1.45553	0.230596	0.525246	0	YW8003
L2_LpH.3vsDM.3	1736	-0.0402376	9.42315	0.0101607	0.919923	0.95106	0	YW8154
L2_LpH.3vsDM.3	1742	0.142255	9.70737	0.0606615	0.806053	0.881285	0	YW8205
L2_LpH.3vsDM.3	1756	0.208037	12.5957	0.325157	0.569852	0.753675	0	Morey_St_Denis
L2_LpH.3vsDM.3	1757	-0.101713	7.69101	0.0359005	0.850146	0.90535	0	Chateau_d.Yquem
L2_LpH.3vsDM.3	1758	-0.321116	11.3896	0.546522	0.461644	0.693467	0	Haut.Brion_1
L2_LpH.3vsDM.3	1759	-0.33467	7.27326	0.405081	0.525985	0.73103	0	Chateau_Cantemerle
L2_LpH.3vsDM.3	1760	0.293839	12.8128	0.259095	0.612426	0.797126	0	Gruaud_Larose
L2_LpH.3vsDM.3	1776	0.910721	8.2697	3.81521	0.0536884	0.33865	0	Massey_GF7
L2_LpH.3vsDM.3	1778	-0.278542	9.98865	0.357621	0.551233	0.745575	0	Massey_GF8C
L2_LpH.3vsDM.3	1781	0.119547	9.72901	0.061698	0.80436	0.881285	0	YW8316_Yquem
L2_LpH.3vsDM.3	1795	0.497911	17.0266	1.83673	0.178502	0.481774	0	Henri.Martin_8130
L2_LpH.3vsDM.3	1796	0.523203	13.7174	2.27594	0.134666	0.411436	0	YW8413
L2_LpH.3vsDM.3	1833	-0.967253	6.76672	3.04053	0.084535	0.411436	0	Uvaferm_43
L2_LpH.3vsDM.3	1910	-0.909885	18.5303	3.87561	0.0518642	0.33865	0	NCYC_738.1
L2_LpH.3vsDM.3	1918	-0.95689	7.36769	2.89458	0.0921802	0.411436	0	DSIR_Wine_Research__R102
L2_LpH.3vsDM.3	2013	0.469208	8.44571	1.19056	0.277936	0.563511	0	Blastocel_Grand_Cru
L2_LpH.3vsDM.3	2078	-0.378972	13.5547	1.23607	0.268995	0.563511	0	Lalvin_CY3079
L2_LpH.3vsDM.3	2079	-0.0984124	7.66504	0.0448679	0.832694	0.898433	0	Enoferm_T306
L2_LpH.3vsDM.3	2260	-0.274013	13.8338	0.557455	0.457104	0.693467	0	Lalvin_QA23
L2_LpH.3vsDM.3	2308	-0.450562	11.9837	1.79944	0.182932	0.481774	0	Brocksopp_1
L2_LpH.3vsDM.3	2776	0.68185	12.7079	2.21413	0.14049	0.411436	0	NT_116
L2_LpH.3vsDM.3	2851	0.0353799	13.0713	0.00797871	0.92901	0.95106	0	Actiflore_Rose
L2_LpH.3vsDM.3	2852	-0.894445	7.4168	2.50654	0.116792	0.411436	0	Zymaflore_F15
L2_LpH.3vsDM.3	2858	0.911262	11.3791	5.66954	0.0192273	0.157664	0	Zymaflore_VL1
L2_LpH.3vsDM.3	2861	-1.12805	11.2167	8.50997	0.00439437	0.0720677	0	Zymaflore_X5
L2_LpH.3vsDM.3	2863	-0.132006	8.58421	0.083432	0.773319	0.881285	0	Collection_Cepage_Chardonnay
L2_LpH.3vsDM.3	2866	-0.436153	13.0298	0.423875	0.517282	0.73103	0	Collection_Cepage_Sauvignon_Blanc
L2_LpH.3vsDM.3	2867	0.0940286	11.2605	0.0782028	0.780347	0.881285	0	Collection_Cepage_Syrah
L2_LpH.3vsDM.3	2874	0.664723	8.78643	2.22591	0.138978	0.411436	0	Fermicru_VR5
L2_LpH.3vsDM.3	2878	1.29724	10.9077	13.0761	0.000478052	0.0177236	1	NT_112
L2_LpH.3vsDM.3	2880	0.099337	12.3641	0.110307	0.740516	0.881285	0	NT_50
L2_LpH.3vsDM.3	2881	0.362845	8.912	0.688003	0.408937	0.693467	0	Vin_2000
L2_LpH.3vsDM.3	2910	0.575281	13.8444	2.94524	0.0893427	0.411436	0	Maurivin_Elegance
L2_LpH.3vsDM.3	2913	2.58777	7.0017	2.4079	0.124556	0.411436	0	Maurivin_Sauvignon
L2_LpH.3vsDM.3	2914	-0.45485	11.627	1.61515	0.206828	0.498821	0	Maurivin_UOA_Maxithiol
L2_HK.3vsDM.3	81	-0.427292	9.5504	0.919049	0.340123	0.480863	0	X81_Brelez
L2_HK.3vsDM.3	170	1.56323	8.26641	11.9635	0.000809357	0.0165918	1	Sep_1
L2_HK.3vsDM.3	213	1.10628	6.35333	5.88073	0.0172098	0.0742739	0	Tintara_1953
L2_HK.3vsDM.3	228	-2.32481	24.5399	22.3828	7.64286e-06	0.000208905	-1	Stoneyfell_1949
L2_HK.3vsDM.3	266	0.161115	7.19845	0.110323	0.740513	0.843362	0	X266
L2_HK.3vsDM.3	722	-0.000423677	8.67483	1.368e-06	0.999069	0.999739	0	X722
L2_HK.3vsDM.3	724	-1.02504	9.20839	3.1768	0.0782977	0.179819	0	Bright_Tokay6
L2_HK.3vsDM.3	735	0.544227	10.9652	1.75119	0.188858	0.360147	0	Beech_Wadenswil
L2_HK.3vsDM.3	740	-0.0601912	8.41234	0.0191598	0.89021	0.94958	0	Trier_25
L2_HK.3vsDM.3	763	0.978055	9.19831	4.32898	0.0401206	0.113445	0	X763
L2_HK.3vsDM.3	778	0.795032	8.86784	2.66388	0.105913	0.226089	0	X778
L2_HK.3vsDM.3	796	-1.17152	21.5357	5.88852	0.0170983	0.0742739	0	X796
L2_HK.3vsDM.3	833	0.997179	7.04771	3.64975	0.0591783	0.151644	0	Penfolds_B
L2_HK.3vsDM.3	838	0.0455901	11.7858	0.0186434	0.891678	0.94958	0	X838
L2_HK.3vsDM.3	896	-0.994741	9.47742	5.37264	0.0225694	0.0847562	0	X896
L2_HK.3vsDM.3	934	-1.42612	8.56366	8.26847	0.00496489	0.0290801	-1	UCD_48.41
L2_HK.3vsDM.3	935	-1.73614	6.29785	1.44335	0.233513	0.375452	0	UCD_C.9
L2_HK.3vsDM.3	947	-0.482503	11.4018	1.43837	0.233343	0.375452	0	Beech_729
L2_HK.3vsDM.3	1001	1.17221	14.4081	10.9412	0.00132278	0.0184165	1	Petaluma_1
L2_HK.3vsDM.3	1017	-0.785436	11.6835	5.05348	0.026855	0.0880845	0	Petaluma_2
L2_HK.3vsDM.3	1082	0.959456	11.4201	6.70274	0.0111161	0.0536189	0	NCYC_761
L2_HK.3vsDM.3	1427	-1.6816	5.90529	1.48194	0.227123	0.375452	0	Lalvin_WSK.27
L2_HK.3vsDM.3	1429	0.647881	11.2899	3.15296	0.0789448	0.179819	0	Lalvin_DV10
L2_HK.3vsDM.3	1432	-0.814872	17.1976	1.20325	0.276679	0.412503	0	Vin_7
L2_HK.3vsDM.3	1436	-0.118255	9.00798	0.0837923	0.772844	0.868126	0	Lalvin_S6U
L2_HK.3vsDM.3	1482	0.0460653	8.32438	0.00759607	0.930733	0.966896	0	C_Todd_1
L2_HK.3vsDM.3	1483	-0.467604	12.8932	1.23168	0.269946	0.409918	0	Lalvin_ICV_D254
L2_HK.3vsDM.3	1485	-0.558651	10.5647	1.54444	0.216972	0.37066	0	Lalvin_RC212
L2_HK.3vsDM.3	1486	-0.0498553	11.7848	0.0189013	0.890937	0.94958	0	Lalvin_BM45
L2_HK.3vsDM.3	1487	-0.738864	12.3208	5.2631	0.0239525	0.0853959	0	Lalvin_Rhone_L2056
L2_HK.3vsDM.3	1488	-1.00214	14.2648	5.36665	0.0227395	0.0847562	0	Lalvin_ICV_D47
L2_HK.3vsDM.3	1490	0.00464793	12.6662	5.61034e-05	0.994046	0.999739	0	Lalvin_Rhone_L2323
L2_HK.3vsDM.3	1491	-0.711968	6.31971	1.60911	0.208086	0.37066	0	Uvaferm_BDX
L2_HK.3vsDM.3	1493	0.553153	8.69811	1.54837	0.216393	0.37066	0	Lalvin_71B
L2_HK.3vsDM.3	1497	-2.27817	12.8887	30.2579	3.11305e-07	2.5527e-05	-1	Lalvin_T73
L2_HK.3vsDM.3	1502	1.28548	9.63531	7.55028	0.00716222	0.0367064	1	Fusion
L2_HK.3vsDM.3	1503	0.395821	11.669	1.35808	0.246746	0.389099	0	X1503
L2_HK.3vsDM.3	1504	0.9856	12.3406	9.44148	0.00275797	0.0228664	1	X1504
L2_HK.3vsDM.3	1505	1.05587	9.20822	8.32649	0.00482116	0.0290801	1	Cerebray
L2_HK.3vsDM.3	1537	0.483399	10.8618	1.63449	0.204153	0.37066	0	Vin_13
L2_HK.3vsDM.3	1688	-0.424935	8.44622	0.984117	0.323668	0.465628	0	Zymaflore_VL3c
L2_HK.3vsDM.3	1706	-0.269953	14.1311	0.175418	0.676707	0.792714	0	unknown
L2_HK.3vsDM.3	1709	0.321671	9.23605	0.512751	0.475681	0.629127	0	Wolf
L2_HK.3vsDM.3	1712	-0.385498	18.9672	0.735483	0.393239	0.546535	0	YW8134
L2_HK.3vsDM.3	1716	0.996798	5.7749	5.08131	0.0265484	0.0880845	0	Petaluma_1A
L2_HK.3vsDM.3	1722	1.52666	6.74579	9.28295	0.00306745	0.0228664	1	CBS_7045
L2_HK.3vsDM.3	1729	1.55228	9.97044	10.0317	0.00206105	0.0228664	1	YW8003
L2_HK.3vsDM.3	1736	0.580911	9.42315	2.11779	0.148914	0.297828	0	YW8154
L2_HK.3vsDM.3	1742	-0.422302	9.70737	0.536921	0.465748	0.626087	0	YW8205
L2_HK.3vsDM.3	1756	-1.20894	12.5957	10.9029	0.00134755	0.0184165	-1	Morey_St_Denis
L2_HK.3vsDM.3	1757	-1.1953	7.69101	4.90047	0.0293655	0.0926143	0	Chateau_d.Yquem
L2_HK.3vsDM.3	1758	-0.933295	11.3896	4.59836	0.0346659	0.101522	0	Haut.Brion_1
L2_HK.3vsDM.3	1759	-0.969327	7.27326	3.39026	0.0686577	0.170604	0	Chateau_Cantemerle
L2_HK.3vsDM.3	1760	-0.667295	12.8128	1.33378	0.252265	0.390296	0	Gruaud_Larose
L2_HK.3vsDM.3	1776	0.656525	8.2697	1.99255	0.161294	0.314906	0	Massey_GF7
L2_HK.3vsDM.3	1778	0.040089	9.98865	0.00742276	0.931522	0.966896	0	Massey_GF8C
L2_HK.3vsDM.3	1781	-0.231544	9.72901	0.231714	0.631347	0.7579	0	YW8316_Yquem
L2_HK.3vsDM.3	1795	0.556062	17.0266	2.29023	0.133462	0.273597	0	Henri.Martin_8130
L2_HK.3vsDM.3	1796	0.982122	13.7174	7.99371	0.00570854	0.0312067	1	YW8413
L2_HK.3vsDM.3	1833	0.344216	6.76672	0.426448	0.515359	0.660303	0	Uvaferm_43
L2_HK.3vsDM.3	1910	-2.31904	18.5303	24.6225	2.99936e-06	0.000122974	-1	NCYC_738.1
L2_HK.3vsDM.3	1918	-0.58386	7.36769	1.11138	0.294483	0.431207	0	DSIR_Wine_Research__R102
L2_HK.3vsDM.3	2013	0.541864	8.44571	1.59218	0.21006	0.37066	0	Blastocel_Grand_Cru
L2_HK.3vsDM.3	2078	-1.05028	13.5547	9.44861	0.00274824	0.0228664	-1	Lalvin_CY3079
L2_HK.3vsDM.3	2079	0.230975	7.66504	0.248613	0.619189	0.7579	0	Enoferm_T306
L2_HK.3vsDM.3	2260	0.253679	13.8338	0.478022	0.490981	0.639055	0	Lalvin_QA23
L2_HK.3vsDM.3	2308	-0.671873	11.9837	3.99659	0.0484077	0.132314	0	Brocksopp_1
L2_HK.3vsDM.3	2776	0.216315	12.7079	0.22332	0.637745	0.7579	0	NT_116
L2_HK.3vsDM.3	2851	-0.775827	13.0713	3.82543	0.053375	0.141186	0	Actiflore_Rose
L2_HK.3vsDM.3	2852	0.122325	7.4168	0.0547847	0.815455	0.903612	0	Zymaflore_F15
L2_HK.3vsDM.3	2858	0.649922	11.3791	2.89011	0.0923491	0.204666	0	Zymaflore_VL1
L2_HK.3vsDM.3	2861	-0.694982	11.2167	3.24491	0.0747718	0.179819	0	Zymaflore_X5
L2_HK.3vsDM.3	2863	-0.743015	8.58421	2.63907	0.10753	0.226089	0	Collection_Cepage_Chardonnay
L2_HK.3vsDM.3	2866	-1.48337	13.0298	4.85268	0.0311175	0.094505	0	Collection_Cepage_Sauvignon_Blanc
L2_HK.3vsDM.3	2867	-0.159162	11.2605	0.224059	0.637034	0.7579	0	Collection_Cepage_Syrah
L2_HK.3vsDM.3	2874	0.252373	8.78643	0.322073	0.571684	0.721201	0	Fermicru_VR5
L2_HK.3vsDM.3	2878	0.85798	10.9077	5.74793	0.0184348	0.0755827	0	NT_112
L2_HK.3vsDM.3	2880	-0.113917	12.3641	0.145064	0.704135	0.813227	0	NT_50
L2_HK.3vsDM.3	2881	0.331378	8.912	0.575844	0.449837	0.614777	0	Vin_2000
L2_HK.3vsDM.3	2910	1.02131	13.8444	9.25149	0.00303097	0.0228664	1	Maurivin_Elegance
L2_HK.3vsDM.3	2913	-0.421329	7.0017	1.07981e-07	0.999739	0.999739	0	Maurivin_Sauvignon
L2_HK.3vsDM.3	2914	-1.05923	11.627	8.72007	0.0039534	0.0270149	-1	Maurivin_UOA_Maxithiol
L2_LpH.HCu.3vsDM.3	81	1.07292	9.5504	5.07425	0.0265514	0.036902	1	X81_Brelez
L2_LpH.HCu.3vsDM.3	170	0.417479	8.26641	0.416632	0.520156	0.553932	0	Sep_1
L2_LpH.HCu.3vsDM.3	213	3.72541	6.35333	21.9505	9.38112e-06	2.40391e-05	1	Tintara_1953
L2_LpH.HCu.3vsDM.3	228	8.66347	24.5399	242.605	4.52739e-28	1.23749e-26	1	Stoneyfell_1949
L2_LpH.HCu.3vsDM.3	266	3.39859	7.19845	28.8433	5.61815e-07	1.58858e-06	1	X266
L2_LpH.HCu.3vsDM.3	722	-0.0689722	8.67483	0.0175099	0.895015	0.895015	0	X722
L2_LpH.HCu.3vsDM.3	724	1.79642	9.20839	8.19309	0.00530498	0.00836555	1	Bright_Tokay6
L2_LpH.HCu.3vsDM.3	735	2.75961	10.9652	41.2831	5.00022e-09	1.86372e-08	1	Beech_Wadenswil
L2_LpH.HCu.3vsDM.3	740	-0.453488	8.41234	0.642881	0.424727	0.47709	0	Trier_25
L2_LpH.HCu.3vsDM.3	763	1.81535	9.19831	12.0896	0.000762169	0.00145344	1	X763
L2_LpH.HCu.3vsDM.3	778	5.18382	8.86784	87.2069	3.78988e-15	4.283e-14	1	X778
L2_LpH.HCu.3vsDM.3	796	9.32282	21.5357	276.574	4.45976e-30	3.65701e-28	1	X796
L2_LpH.HCu.3vsDM.3	833	3.14069	7.04771	16.7633	9.06156e-05	0.000195539	1	Penfolds_B
L2_LpH.HCu.3vsDM.3	838	3.20093	11.7858	86.8394	4.17853e-15	4.283e-14	1	X838
L2_LpH.HCu.3vsDM.3	896	-0.415865	9.47742	0.764797	0.384005	0.438749	0	X896
L2_LpH.HCu.3vsDM.3	934	0.367259	8.56366	0.43089	0.513116	0.553625	0	UCD_48.41
L2_LpH.HCu.3vsDM.3	935	8.30613	6.29785	41.6988	1.06761e-08	3.50177e-08	1	UCD_C.9
L2_LpH.HCu.3vsDM.3	947	-1.63536	11.4018	14.5233	0.000243835	0.000476058	-1	Beech_729
L2_LpH.HCu.3vsDM.3	1001	2.76317	14.4081	58.8786	1.35909e-11	6.96531e-11	1	Petaluma_1
L2_LpH.HCu.3vsDM.3	1017	-1.09014	11.6835	9.20488	0.00310212	0.00498773	-1	Petaluma_2
L2_LpH.HCu.3vsDM.3	1082	0.22936	11.4201	0.331758	0.565968	0.594992	0	NCYC_761
L2_LpH.HCu.3vsDM.3	1427	6.46381	5.90529	11.3	0.00120024	0.0021195	1	Lalvin_WSK.27
L2_LpH.HCu.3vsDM.3	1429	3.28195	11.2899	75.8382	8.55874e-14	7.79796e-13	1	Lalvin_DV10
L2_LpH.HCu.3vsDM.3	1432	6.87353	17.1976	71.0529	4.6847e-12	2.95496e-11	1	Vin_7
L2_LpH.HCu.3vsDM.3	1436	-0.957868	9.00798	3.44694	0.0664228	0.0878495	0	Lalvin_S6U
L2_LpH.HCu.3vsDM.3	1482	4.32101	8.32438	37.7399	1.90819e-08	5.94657e-08	1	C_Todd_1
L2_LpH.HCu.3vsDM.3	1483	-1.39634	12.8932	10.5444	0.00162224	0.00277133	-1	Lalvin_ICV_D254
L2_LpH.HCu.3vsDM.3	1485	-1.72828	10.5647	11.778	0.000884324	0.00164806	-1	Lalvin_RC212
L2_LpH.HCu.3vsDM.3	1486	-1.62846	11.7848	18.669	3.78082e-05	8.61186e-05	-1	Lalvin_BM45
L2_LpH.HCu.3vsDM.3	1487	-2.64217	12.3208	60.7713	7.50933e-12	4.39832e-11	-1	Lalvin_Rhone_L2056
L2_LpH.HCu.3vsDM.3	1488	1.19248	14.2648	7.56201	0.00717345	0.010893	1	Lalvin_ICV_D47
L2_LpH.HCu.3vsDM.3	1490	-2.70772	12.6662	17.188	9.90911e-05	0.000208345	-1	Lalvin_Rhone_L2323
L2_LpH.HCu.3vsDM.3	1491	0.806714	6.31971	0.503077	0.480096	0.524905	0	Uvaferm_BDX
L2_LpH.HCu.3vsDM.3	1493	1.07609	8.69811	4.33387	0.0400107	0.0546813	0	Lalvin_71B
L2_LpH.HCu.3vsDM.3	1497	-1.33614	12.8887	10.3446	0.00176873	0.00295992	-1	Lalvin_T73
L2_LpH.HCu.3vsDM.3	1502	0.892441	9.63531	3.01642	0.0856194	0.111441	0	Fusion
L2_LpH.HCu.3vsDM.3	1503	2.12048	11.669	37.5267	1.95802e-08	5.94657e-08	1	X1503
L2_LpH.HCu.3vsDM.3	1504	0.436462	12.3406	1.79025	0.184044	0.225248	0	X1504
L2_LpH.HCu.3vsDM.3	1505	1.36754	9.20822	11.1511	0.00119514	0.0021195	1	Cerebray
L2_LpH.HCu.3vsDM.3	1537	-1.60571	10.8618	14.7332	0.000221382	0.000442764	-1	Vin_13
L2_LpH.HCu.3vsDM.3	1688	-1.57546	8.44622	7.24789	0.00837053	0.0122568	-1	Zymaflore_VL3c
L2_LpH.HCu.3vsDM.3	1706	1.01967	14.1311	2.48078	0.120051	0.152581	0	unknown
L2_LpH.HCu.3vsDM.3	1709	-2.81365	9.23605	17.7021	5.79358e-05	0.000128398	-1	Wolf
L2_LpH.HCu.3vsDM.3	1712	2.10676	18.9672	21.4919	1.1153e-05	2.75909e-05	1	YW8134
L2_LpH.HCu.3vsDM.3	1716	2.30899	5.7749	5.65113	0.0195056	0.0280606	1	Petaluma_1A
L2_LpH.HCu.3vsDM.3	1722	4.49018	6.74579	30.928	2.94002e-07	8.61006e-07	1	CBS_7045
L2_LpH.HCu.3vsDM.3	1729	2.48993	9.97044	21.4322	1.14401e-05	2.75909e-05	1	YW8003
L2_LpH.HCu.3vsDM.3	1736	-0.87731	9.42315	3.48802	0.0649167	0.087265	0	YW8154
L2_LpH.HCu.3vsDM.3	1742	2.74017	9.70737	19.7936	2.62311e-05	6.14556e-05	1	YW8205
L2_LpH.HCu.3vsDM.3	1756	-3.28898	12.5957	71.4749	2.99583e-13	2.45658e-12	-1	Morey_St_Denis
L2_LpH.HCu.3vsDM.3	1757	-0.367113	7.69101	0.162354	0.68795	0.696443	0	Chateau_d.Yquem
L2_LpH.HCu.3vsDM.3	1758	-3.72407	11.3896	57.5365	2.73357e-11	1.24529e-10	-1	Haut.Brion_1
L2_LpH.HCu.3vsDM.3	1759	-2.41783	7.27326	7.81539	0.00625226	0.00967331	-1	Chateau_Cantemerle
L2_LpH.HCu.3vsDM.3	1760	5.49422	12.8128	79.592	5.60042e-13	4.17486e-12	1	Gruaud_Larose
L2_LpH.HCu.3vsDM.3	1776	-0.614669	8.2697	0.818145	0.367978	0.43106	0	Massey_GF7
L2_LpH.HCu.3vsDM.3	1778	-1.45946	9.98865	7.32045	0.00806245	0.0120204	-1	Massey_GF8C
L2_LpH.HCu.3vsDM.3	1781	-0.26686	9.72901	0.24642	0.620737	0.636796	0	YW8316_Yquem
L2_LpH.HCu.3vsDM.3	1795	4.24381	17.0266	123.005	6.53467e-19	1.07169e-17	1	Henri.Martin_8130
L2_LpH.HCu.3vsDM.3	1796	3.39368	13.7174	90.6067	1.55023e-15	2.11864e-14	1	YW8413
L2_LpH.HCu.3vsDM.3	1833	0.79326	6.76672	0.52393	0.470998	0.521917	0	Uvaferm_43
L2_LpH.HCu.3vsDM.3	1910	8.25496	18.5303	248.479	1.97154e-28	8.08333e-27	1	NCYC_738.1
L2_LpH.HCu.3vsDM.3	1918	0.968869	7.36769	1.56733	0.213698	0.25396	0	DSIR_Wine_Research__R102
L2_LpH.HCu.3vsDM.3	2013	-2.14939	8.44571	9.99893	0.00209445	0.00343491	-1	Blastocel_Grand_Cru
L2_LpH.HCu.3vsDM.3	2078	-2.18961	13.5547	39.4949	9.52807e-09	3.25542e-08	-1	Lalvin_CY3079
L2_LpH.HCu.3vsDM.3	2079	-1.73575	7.66504	5.39648	0.0222797	0.0314988	-1	Enoferm_T306
L2_LpH.HCu.3vsDM.3	2260	4.53478	13.8338	139.104	2.09912e-20	4.3032e-19	1	Lalvin_QA23
L2_LpH.HCu.3vsDM.3	2308	-2.29306	11.9837	42.55	3.18375e-09	1.24318e-08	-1	Brocksopp_1
L2_LpH.HCu.3vsDM.3	2776	-1.89825	12.7079	15.7441	0.000151917	0.00031143	-1	NT_116
L2_LpH.HCu.3vsDM.3	2851	-3.125	13.0713	56.4591	2.93365e-11	1.2661e-10	-1	Actiflore_Rose
L2_LpH.HCu.3vsDM.3	2852	1.60217	7.4168	2.44993	0.120949	0.152581	0	Zymaflore_F15
L2_LpH.HCu.3vsDM.3	2858	-1.3786	11.3791	11.1172	0.00121484	0.0021195	-1	Zymaflore_VL1
L2_LpH.HCu.3vsDM.3	2861	-2.96246	11.2167	44.2696	1.73737e-09	7.1232e-09	-1	Zymaflore_X5
L2_LpH.HCu.3vsDM.3	2863	-0.951109	8.58421	2.41915	0.123137	0.152988	0	Collection_Cepage_Chardonnay
L2_LpH.HCu.3vsDM.3	2866	5.95433	13.0298	68.3522	9.10029e-12	4.97482e-11	1	Collection_Cepage_Sauvignon_Blanc
L2_LpH.HCu.3vsDM.3	2867	-1.73141	11.2605	23.2066	5.40514e-06	1.42975e-05	-1	Collection_Cepage_Syrah
L2_LpH.HCu.3vsDM.3	2874	-0.751915	8.78643	1.66816	0.199594	0.240686	0	Fermicru_VR5
L2_LpH.HCu.3vsDM.3	2878	0.327208	10.9077	0.760809	0.385243	0.438749	0	NT_112
L2_LpH.HCu.3vsDM.3	2880	1.48056	12.3641	23.8415	4.14647e-06	1.13337e-05	1	NT_50
L2_LpH.HCu.3vsDM.3	2881	-0.271158	8.912	0.245709	0.621265	0.636796	0	Vin_2000
L2_LpH.HCu.3vsDM.3	2910	2.81977	13.8444	68.0124	8.29407e-13	5.66761e-12	1	Maurivin_Elegance
L2_LpH.HCu.3vsDM.3	2913	10.575	7.0017	60.8926	1.66514e-11	8.03185e-11	1	Maurivin_Sauvignon
L2_LpH.HCu.3vsDM.3	2914	-2.42595	11.627	40.5299	6.5532e-09	2.33636e-08	-1	Maurivin_UOA_Maxithiol
L2_LpH.HK.3vsDM.3	81	0.351184	9.5504	0.621663	0.432365	0.571837	0	X81_Brelez
L2_LpH.HK.3vsDM.3	170	2.10794	8.26641	21.5682	1.07961e-05	0.000756257	1	Sep_1
L2_LpH.HK.3vsDM.3	213	1.60542	6.35333	12.4671	0.000642484	0.00478943	1	Tintara_1953
L2_LpH.HK.3vsDM.3	228	-1.5923	24.5399	10.6456	0.00152676	0.00963034	-1	Stoneyfell_1949
L2_LpH.HK.3vsDM.3	266	0.827743	7.19845	2.90365	0.0916687	0.170837	0	X266
L2_LpH.HK.3vsDM.3	722	0.932168	8.67483	5.1327	0.0258148	0.0661505	0	X722
L2_LpH.HK.3vsDM.3	724	-0.187473	9.20839	0.10699	0.744409	0.824886	0	Bright_Tokay6
L2_LpH.HK.3vsDM.3	735	1.0606	10.9652	6.62689	0.0115669	0.035129	1	Beech_Wadenswil
L2_LpH.HK.3vsDM.3	740	-0.058917	8.41234	0.0183401	0.89257	0.950529	0	Trier_25
L2_LpH.HK.3vsDM.3	763	0.773878	9.19831	2.71089	0.102922	0.181582	0	X763
L2_LpH.HK.3vsDM.3	778	0.353074	8.86784	0.5119	0.476047	0.609935	0	X778
L2_LpH.HK.3vsDM.3	796	-1.27189	21.5357	6.93202	0.00986174	0.0336943	-1	X796
L2_LpH.HK.3vsDM.3	833	1.05164	7.04771	4.02464	0.0477638	0.106941	0	Penfolds_B
L2_LpH.HK.3vsDM.3	838	-0.11622	11.7858	0.121084	0.72862	0.819602	0	X838
L2_LpH.HK.3vsDM.3	896	-1.03333	9.47742	5.79146	0.0180096	0.0476383	-1	X896
L2_LpH.HK.3vsDM.3	934	-1.47376	8.56366	8.80522	0.00378799	0.0163482	-1	UCD_48.41
L2_LpH.HK.3vsDM.3	935	-1.53084	6.29785	1.12829	0.29167	0.404815	0	UCD_C.9
L2_LpH.HK.3vsDM.3	947	-0.502595	11.4018	1.56006	0.214681	0.325997	0	Beech_729
L2_LpH.HK.3vsDM.3	1001	1.60209	14.4081	20.3184	1.84453e-05	0.000756257	1	Petaluma_1
L2_LpH.HK.3vsDM.3	1017	-0.717308	11.6835	4.21674	0.0427352	0.100122	0	Petaluma_2
L2_LpH.HK.3vsDM.3	1082	1.63816	11.4201	19.3732	2.77867e-05	0.000759504	1	NCYC_761
L2_LpH.HK.3vsDM.3	1427	-1.7128	5.90529	1.299	0.257866	0.370966	0	Lalvin_WSK.27
L2_LpH.HK.3vsDM.3	1429	1.06773	11.2899	8.53246	0.00434484	0.0178138	1	Lalvin_DV10
L2_LpH.HK.3vsDM.3	1432	-0.390637	17.1976	0.277247	0.600285	0.704429	0	Vin_7
L2_LpH.HK.3vsDM.3	1436	1.0671	9.00798	6.79437	0.0105959	0.0339205	1	Lalvin_S6U
L2_LpH.HK.3vsDM.3	1482	-0.161974	8.32438	0.0832788	0.773535	0.845732	0	C_Todd_1
L2_LpH.HK.3vsDM.3	1483	-1.43	12.8932	11.4131	0.00106724	0.00729279	-1	Lalvin_ICV_D254
L2_LpH.HK.3vsDM.3	1485	-1.39056	10.5647	9.48333	0.00270134	0.012413	-1	Lalvin_RC212
L2_LpH.HK.3vsDM.3	1486	0.462129	11.7848	1.62248	0.205808	0.31842	0	Lalvin_BM45
L2_LpH.HK.3vsDM.3	1487	-1.20628	12.3208	13.964	0.00031583	0.00323726	-1	Lalvin_Rhone_L2056
L2_LpH.HK.3vsDM.3	1488	0.0486089	14.2648	0.0126896	0.910554	0.95725	0	Lalvin_ICV_D47
L2_LpH.HK.3vsDM.3	1490	0.387844	12.6662	0.390276	0.534319	0.663851	0	Lalvin_Rhone_L2323
L2_LpH.HK.3vsDM.3	1491	-1.45656	6.31971	6.25678	0.0142928	0.039067	-1	Uvaferm_BDX
L2_LpH.HK.3vsDM.3	1493	-0.0111755	8.69811	0.000620362	0.980181	0.98543	0	Lalvin_71B
L2_LpH.HK.3vsDM.3	1497	-0.0717386	12.8887	0.0307749	0.861112	0.929095	0	Lalvin_T73
L2_LpH.HK.3vsDM.3	1502	0.766115	9.63531	2.69254	0.104078	0.181582	0	Fusion
L2_LpH.HK.3vsDM.3	1503	0.410939	11.669	1.46371	0.229299	0.341865	0	X1503
L2_LpH.HK.3vsDM.3	1504	0.801101	12.3406	6.24707	0.0141298	0.039067	1	X1504
L2_LpH.HK.3vsDM.3	1505	1.41057	9.20822	14.7985	0.000214841	0.00287003	1	Cerebray
L2_LpH.HK.3vsDM.3	1537	0.699147	10.8618	3.41425	0.067702	0.135404	0	Vin_13
L2_LpH.HK.3vsDM.3	1688	-0.00962503	8.44622	0.000503908	0.982137	0.98543	0	Zymaflore_VL3c
L2_LpH.HK.3vsDM.3	1706	0.679346	14.1311	1.10878	0.296206	0.404815	0	unknown
L2_LpH.HK.3vsDM.3	1709	0.647288	9.23605	2.07392	0.153075	0.251044	0	Wolf
L2_LpH.HK.3vsDM.3	1712	0.583724	18.9672	1.68475	0.197392	0.311272	0	YW8134
L2_LpH.HK.3vsDM.3	1716	1.26605	5.7749	8.21469	0.00514523	0.0200909	1	Petaluma_1A
L2_LpH.HK.3vsDM.3	1722	2.16033	6.74579	18.4361	4.57666e-05	0.000938215	1	CBS_7045
L2_LpH.HK.3vsDM.3	1729	1.8102	9.97044	13.5806	0.000377507	0.00343951	1	YW8003
L2_LpH.HK.3vsDM.3	1736	0.663974	9.42315	2.76568	0.0996226	0.181534	0	YW8154
L2_LpH.HK.3vsDM.3	1742	0.0533483	9.70737	0.00857549	0.926438	0.96162	0	YW8205
L2_LpH.HK.3vsDM.3	1756	-0.417203	12.5957	1.30678	0.255809	0.370966	0	Morey_St_Denis
L2_LpH.HK.3vsDM.3	1757	-1.39148	7.69101	6.51547	0.0123711	0.0362298	-1	Chateau_d.Yquem
L2_LpH.HK.3vsDM.3	1758	-1.1696	11.3896	7.20335	0.00864422	0.0308185	-1	Haut.Brion_1
L2_LpH.HK.3vsDM.3	1759	-1.12893	7.27326	4.58241	0.0348244	0.0839882	0	Chateau_Cantemerle
L2_LpH.HK.3vsDM.3	1760	0.253313	12.8128	0.19272	0.662084	0.764661	0	Gruaud_Larose
L2_LpH.HK.3vsDM.3	1776	1.50159	8.2697	10.3466	0.00176634	0.00987898	1	Massey_GF7
L2_LpH.HK.3vsDM.3	1778	0.357269	9.98865	0.589081	0.444651	0.578752	0	Massey_GF8C
L2_LpH.HK.3vsDM.3	1781	0.252097	9.72901	0.274786	0.601342	0.704429	0	YW8316_Yquem
L2_LpH.HK.3vsDM.3	1795	1.13322	17.0266	9.46587	0.00272481	0.012413	1	Henri.Martin_8130
L2_LpH.HK.3vsDM.3	1796	1.32594	13.7174	14.513	0.000245003	0.00287003	1	YW8413
L2_LpH.HK.3vsDM.3	1833	-0.814128	6.76672	2.25853	0.13629	0.228078	0	Uvaferm_43
L2_LpH.HK.3vsDM.3	1910	-1.00757	18.5303	4.74858	0.0317591	0.0789166	0	NCYC_738.1
L2_LpH.HK.3vsDM.3	1918	-1.11643	7.36769	3.98192	0.0488827	0.106941	0	DSIR_Wine_Research__R102
L2_LpH.HK.3vsDM.3	2013	1.17594	8.44571	7.46529	0.00748229	0.0278885	1	Blastocel_Grand_Cru
L2_LpH.HK.3vsDM.3	2078	-0.603272	13.5547	3.12878	0.0800839	0.152718	0	Lalvin_CY3079
L2_LpH.HK.3vsDM.3	2079	0.280424	7.66504	0.366298	0.546451	0.668791	0	Enoferm_T306
L2_LpH.HK.3vsDM.3	2260	0.253397	13.8338	0.476859	0.491508	0.620056	0	Lalvin_QA23
L2_LpH.HK.3vsDM.3	2308	-0.60074	11.9837	3.19649	0.0769385	0.150213	0	Brocksopp_1
L2_LpH.HK.3vsDM.3	2776	0.89564	12.7079	3.81407	0.0541476	0.113849	0	NT_116
L2_LpH.HK.3vsDM.3	2851	0.00725404	13.0713	0.00033521	0.98543	0.98543	0	Actiflore_Rose
L2_LpH.HK.3vsDM.3	2852	-0.756924	7.4168	1.92295	0.168868	0.271513	0	Zymaflore_F15
L2_LpH.HK.3vsDM.3	2858	0.711682	11.3791	3.46373	0.0657759	0.134841	0	Zymaflore_VL1
L2_LpH.HK.3vsDM.3	2861	-1.19071	11.2167	9.47785	0.00270868	0.012413	-1	Zymaflore_X5
L2_LpH.HK.3vsDM.3	2863	-0.494501	8.58421	1.17063	0.281971	0.398648	0	Collection_Cepage_Chardonnay
L2_LpH.HK.3vsDM.3	2866	-1.01634	13.0298	2.29279	0.134774	0.228078	0	Collection_Cepage_Sauvignon_Blanc
L2_LpH.HK.3vsDM.3	2867	0.182168	11.2605	0.293546	0.589207	0.704429	0	Collection_Cepage_Syrah
L2_LpH.HK.3vsDM.3	2874	1.15977	8.78643	6.76581	0.0107553	0.0339205	1	Fermicru_VR5
L2_LpH.HK.3vsDM.3	2878	1.27744	10.9077	12.686	0.00057446	0.00471057	1	NT_112
L2_LpH.HK.3vsDM.3	2880	0.103661	12.3641	0.120133	0.729646	0.819602	0	NT_50
L2_LpH.HK.3vsDM.3	2881	0.869872	8.912	3.95745	0.0495582	0.106941	0	Vin_2000
L2_LpH.HK.3vsDM.3	2910	1.07797	13.8444	10.2999	0.00180713	0.00987898	1	Maurivin_Elegance
L2_LpH.HK.3vsDM.3	2913	1.3584	7.0017	0.93015	0.337646	0.453884	0	Maurivin_Sauvignon
L2_LpH.HK.3vsDM.3	2914	-1.40223	11.627	15.2152	0.000177502	0.00287003	-1	Maurivin_UOA_Maxithiol
L2_HCu.HK.3vsDM.3	81	-0.244617	9.5504	0.279203	0.598438	0.645684	0	X81_Brelez
L2_HCu.HK.3vsDM.3	170	-0.772218	8.26641	1.75812	0.187993	0.217119	0	Sep_1
L2_HCu.HK.3vsDM.3	213	-1.17512	6.35333	0.790916	0.376084	0.42245	0	Tintara_1953
L2_HCu.HK.3vsDM.3	228	7.47894	24.5399	191.19	1.30168e-24	1.06738e-22	1	Stoneyfell_1949
L2_HCu.HK.3vsDM.3	266	2.83473	7.19845	27.6024	9.20078e-07	1.88616e-06	1	X266
L2_HCu.HK.3vsDM.3	722	-2.81987	8.67483	25.5124	2.20282e-06	4.20073e-06	-1	X722
L2_HCu.HK.3vsDM.3	724	2.637	9.20839	20.1307	2.275e-05	4.05544e-05	1	Bright_Tokay6
L2_HCu.HK.3vsDM.3	735	3.22905	10.9652	58.3612	1.60047e-11	5.04765e-11	1	Beech_Wadenswil
L2_HCu.HK.3vsDM.3	740	-3.56753	8.41234	31.4165	2.14168e-07	4.74643e-07	-1	Trier_25
L2_HCu.HK.3vsDM.3	763	-0.840259	9.19831	2.34268	0.129148	0.158062	0	X763
L2_HCu.HK.3vsDM.3	778	0.545647	8.86784	0.521784	0.47183	0.522839	0	X778
L2_HCu.HK.3vsDM.3	796	5.65547	21.5357	120.465	1.15071e-18	7.86317e-18	1	X796
L2_HCu.HK.3vsDM.3	833	0.256993	7.04771	0.0910945	0.763469	0.802621	0	Penfolds_B
L2_HCu.HK.3vsDM.3	838	3.8676	11.7858	125.134	4.08788e-19	3.04733e-18	1	X838
L2_HCu.HK.3vsDM.3	896	0.025921	9.47742	0.00350153	0.952936	0.952936	0	X896
L2_HCu.HK.3vsDM.3	934	2.51111	8.56366	24.8643	2.7146e-06	5.05903e-06	1	UCD_48.41
L2_HCu.HK.3vsDM.3	935	4.15349	6.29785	3.26301	0.0750146	0.0961124	0	UCD_C.9
L2_HCu.HK.3vsDM.3	947	-5.3306	11.4018	131.173	1.10732e-19	1.29715e-18	-1	Beech_729
L2_HCu.HK.3vsDM.3	1001	3.94393	14.4081	116.042	3.13217e-18	1.83456e-17	1	Petaluma_1
L2_HCu.HK.3vsDM.3	1017	-1.05035	11.6835	8.90915	0.00359576	0.00517284	-1	Petaluma_2
L2_HCu.HK.3vsDM.3	1082	-3.56332	11.4201	67.3408	1.01313e-12	3.46152e-12	-1	NCYC_761
L2_HCu.HK.3vsDM.3	1427	-1.1898	5.90529	0.0567057	0.812402	0.832712	0	Lalvin_WSK.27
L2_HCu.HK.3vsDM.3	1429	3.25276	11.2899	75.5778	9.21484e-14	3.59818e-13	1	Lalvin_DV10
L2_HCu.HK.3vsDM.3	1432	5.3667	17.1976	46.2321	3.75307e-09	9.92746e-09	1	Vin_7
L2_HCu.HK.3vsDM.3	1436	-1.78271	9.00798	14.2843	0.000272275	0.000429357	-1	Lalvin_S6U
L2_HCu.HK.3vsDM.3	1482	-0.267596	8.32438	0.0572935	0.811345	0.832712	0	C_Todd_1
L2_HCu.HK.3vsDM.3	1483	-4.75065	12.8932	108.024	3.07814e-17	1.68272e-16	-1	Lalvin_ICV_D254
L2_HCu.HK.3vsDM.3	1485	-4.92775	10.5647	80.7992	2.14147e-14	8.78003e-14	-1	Lalvin_RC212
L2_HCu.HK.3vsDM.3	1486	-1.25566	11.7848	11.7299	0.000904912	0.00134914	-1	Lalvin_BM45
L2_HCu.HK.3vsDM.3	1487	-2.31099	12.3208	49.6157	2.77566e-10	8.42978e-10	-1	Lalvin_Rhone_L2056
L2_HCu.HK.3vsDM.3	1488	-2.2721	14.2648	26.8936	1.26526e-06	2.53052e-06	-1	Lalvin_ICV_D47
L2_HCu.HK.3vsDM.3	1490	-5.74342	12.6662	67.7663	1.05294e-11	3.45365e-11	-1	Lalvin_Rhone_L2323
L2_HCu.HK.3vsDM.3	1491	-8.27843	6.31971	6.79101	0.0108189	0.0150364	-1	Uvaferm_BDX
L2_HCu.HK.3vsDM.3	1493	-2.05164	8.69811	12.314	0.000685072	0.00104439	-1	Lalvin_71B
L2_HCu.HK.3vsDM.3	1497	-1.63188	12.8887	15.6273	0.000147225	0.000241448	-1	Lalvin_T73
L2_HCu.HK.3vsDM.3	1502	3.034	9.63531	40.2017	7.37659e-09	1.83297e-08	1	Fusion
L2_HCu.HK.3vsDM.3	1503	3.97094	11.669	127.146	2.63509e-19	2.69778e-18	1	X1503
L2_HCu.HK.3vsDM.3	1504	1.81733	12.3406	31.6383	1.81338e-07	4.13049e-07	1	X1504
L2_HCu.HK.3vsDM.3	1505	1.91801	9.20822	26.0272	1.68545e-06	3.29064e-06	1	Cerebray
L2_HCu.HK.3vsDM.3	1537	-6.06639	10.8618	152.349	1.47589e-21	2.42046e-20	-1	Vin_13
L2_HCu.HK.3vsDM.3	1688	-3.03877	8.44622	30.4814	2.84548e-07	6.14024e-07	-1	Zymaflore_VL3c
L2_HCu.HK.3vsDM.3	1706	0.253137	14.1311	0.154012	0.696001	0.741196	0	unknown
L2_HCu.HK.3vsDM.3	1709	-2.04414	9.23605	16.1273	0.000117276	0.000196257	-1	Wolf
L2_HCu.HK.3vsDM.3	1712	1.22225	18.9672	7.34125	0.00797632	0.0112769	1	YW8134
L2_HCu.HK.3vsDM.3	1716	1.6314	5.7749	5.65842	0.0194294	0.0265535	1	Petaluma_1A
L2_HCu.HK.3vsDM.3	1722	-6.37865	6.74579	2.86505	0.0941262	0.118744	0	CBS_7045
L2_HCu.HK.3vsDM.3	1729	-4.27729	9.97044	20.9103	1.42999e-05	2.60576e-05	-1	YW8003
L2_HCu.HK.3vsDM.3	1736	-0.760583	9.42315	3.27145	0.0736787	0.0958992	0	YW8154
L2_HCu.HK.3vsDM.3	1742	5.33002	9.70737	76.1295	2.09288e-13	7.46157e-13	1	YW8205
L2_HCu.HK.3vsDM.3	1756	-5.44177	12.5957	183.136	5.15471e-24	2.11343e-22	-1	Morey_St_Denis
L2_HCu.HK.3vsDM.3	1757	-10.0841	7.69101	17.9508	5.4487e-05	9.3082e-05	-1	Chateau_d.Yquem
L2_HCu.HK.3vsDM.3	1758	-5.52377	11.3896	121.757	1.79122e-18	1.12985e-17	-1	Haut.Brion_1
L2_HCu.HK.3vsDM.3	1759	-3.07788	7.27326	18.0572	4.95028e-05	8.63665e-05	-1	Chateau_Cantemerle
L2_HCu.HK.3vsDM.3	1760	2.08432	12.8128	12.6815	0.000687768	0.00104439	1	Gruaud_Larose
L2_HCu.HK.3vsDM.3	1776	-0.347386	8.2697	0.436651	0.51032	0.557949	0	Massey_GF7
L2_HCu.HK.3vsDM.3	1778	-0.72898	9.98865	2.28696	0.133737	0.158934	0	Massey_GF8C
L2_HCu.HK.3vsDM.3	1781	-4.67271	9.72901	46.3285	8.49945e-10	2.48912e-09	-1	YW8316_Yquem
L2_HCu.HK.3vsDM.3	1795	4.81317	17.0266	154.996	8.83238e-22	1.81064e-20	1	Henri.Martin_8130
L2_HCu.HK.3vsDM.3	1796	4.40726	13.7174	148.098	3.40561e-21	4.65433e-20	1	YW8413
L2_HCu.HK.3vsDM.3	1833	-1.43284	6.76672	1.86756	0.175071	0.205083	0	Uvaferm_43
L2_HCu.HK.3vsDM.3	1910	2.8263	18.5303	36.1349	3.28135e-08	7.68774e-08	1	NCYC_738.1
L2_HCu.HK.3vsDM.3	1918	-1.57177	7.36769	3.61425	0.0603467	0.0798134	0	DSIR_Wine_Research__R102
L2_HCu.HK.3vsDM.3	2013	0.471087	8.44571	1.08486	0.300218	0.341915	0	Blastocel_Grand_Cru
L2_HCu.HK.3vsDM.3	2078	-1.31192	13.5547	14.6454	0.000230511	0.000370626	-1	Lalvin_CY3079
L2_HCu.HK.3vsDM.3	2079	-0.0793086	7.66504	0.0243654	0.876285	0.887104	0	Enoferm_T306
L2_HCu.HK.3vsDM.3	2260	4.89521	13.8338	160.101	3.33132e-22	9.1056e-21	1	Lalvin_QA23
L2_HCu.HK.3vsDM.3	2308	-2.18561	11.9837	40.7808	5.98751e-09	1.5343e-08	-1	Brocksopp_1
L2_HCu.HK.3vsDM.3	2776	-5.04115	12.7079	97.7798	9.54666e-16	4.34903e-15	-1	NT_116
L2_HCu.HK.3vsDM.3	2851	-4.1251	13.0713	97.981	2.35791e-16	1.20843e-15	-1	Actiflore_Rose
L2_HCu.HK.3vsDM.3	2852	-2.21987	7.4168	2.38707	0.125761	0.156248	0	Zymaflore_F15
L2_HCu.HK.3vsDM.3	2858	-4.30427	11.3791	97.3799	2.74162e-16	1.32243e-15	-1	Zymaflore_VL1
L2_HCu.HK.3vsDM.3	2861	-5.0214	11.2167	125.583	3.70568e-19	3.03866e-18	-1	Zymaflore_X5
L2_HCu.HK.3vsDM.3	2863	-3.40127	8.58421	28.4587	6.32579e-07	1.33004e-06	-1	Collection_Cepage_Chardonnay
L2_HCu.HK.3vsDM.3	2866	4.60487	13.0298	43.1587	9.54617e-09	2.30231e-08	1	Collection_Cepage_Sauvignon_Blanc
L2_HCu.HK.3vsDM.3	2867	-0.515542	11.2605	2.31055	0.131771	0.158901	0	Collection_Cepage_Syrah
L2_HCu.HK.3vsDM.3	2874	-4.98036	8.78643	44.085	1.85342e-09	5.24069e-09	-1	Fermicru_VR5
L2_HCu.HK.3vsDM.3	2878	-1.15905	10.9077	9.89523	0.00220405	0.00322735	-1	NT_112
L2_HCu.HK.3vsDM.3	2880	2.86294	12.3641	88.0247	3.05192e-15	1.31714e-14	1	NT_50
L2_HCu.HK.3vsDM.3	2881	-4.821	8.912	42.3843	3.59682e-09	9.83131e-09	-1	Vin_2000
L2_HCu.HK.3vsDM.3	2910	3.90407	13.8444	126.61	2.96098e-19	2.69778e-18	1	Maurivin_Elegance
L2_HCu.HK.3vsDM.3	2913	5.38141	7.0017	4.40945	0.0387989	0.0521559	0	Maurivin_Sauvignon
L2_HCu.HK.3vsDM.3	2914	-3.20097	11.627	73.1246	1.85826e-13	6.92624e-13	-1	Maurivin_UOA_Maxithiol
L2_LpH.HCu.HK.3vsDM.3	81	-0.171123	9.5504	0.0588284	0.808873	0.850353	0	X81_Brelez
L2_LpH.HCu.HK.3vsDM.3	170	1.66024	8.26641	3.21061	0.0762996	0.127685	0	Sep_1
L2_LpH.HCu.HK.3vsDM.3	213	4.80861	6.35333	13.5853	0.000380376	0.00129962	1	Tintara_1953
L2_LpH.HCu.HK.3vsDM.3	228	12.8142	24.5399	435.921	1.51853e-37	1.2452e-35	1	Stoneyfell_1949
L2_LpH.HCu.HK.3vsDM.3	266	3.03995	7.19845	5.22593	0.024489	0.0502025	0	X266
L2_LpH.HCu.HK.3vsDM.3	722	-1.95775	8.67483	2.53356	0.114864	0.181131	0	X722
L2_LpH.HCu.HK.3vsDM.3	724	3.51593	9.20839	28.6954	7.24626e-07	4.57072e-06	1	Bright_Tokay6
L2_LpH.HCu.HK.3vsDM.3	735	1.28261	10.9652	4.67843	0.0330168	0.0644613	0	Beech_Wadenswil
L2_LpH.HCu.HK.3vsDM.3	740	-12.1381	8.41234	6.75765	0.0108667	0.0244516	-1	Trier_25
L2_LpH.HCu.HK.3vsDM.3	763	-0.442118	9.19831	0.134604	0.714509	0.760906	0	X763
L2_LpH.HCu.HK.3vsDM.3	778	3.81232	8.86784	7.81199	0.00626316	0.0160493	1	X778
L2_LpH.HCu.HK.3vsDM.3	796	6.26522	21.5357	143.989	7.75014e-21	2.11837e-19	1	X796
L2_LpH.HCu.HK.3vsDM.3	833	1.92941	7.04771	0.774849	0.381005	0.503909	0	Penfolds_B
L2_LpH.HCu.HK.3vsDM.3	838	1.48977	11.7858	16.7869	8.71458e-05	0.000376103	1	X838
L2_LpH.HCu.HK.3vsDM.3	896	-0.808328	9.47742	1.3836	0.242385	0.33126	0	X896
L2_LpH.HCu.HK.3vsDM.3	934	0.532657	8.56366	0.499781	0.481302	0.597981	0	UCD_48.41
L2_LpH.HCu.HK.3vsDM.3	935	-1.83976	6.29785	0.0036332	0.952102	0.975904	0	UCD_C.9
L2_LpH.HCu.HK.3vsDM.3	947	-1.07833	11.4018	4.80359	0.0308086	0.0616172	0	Beech_729
L2_LpH.HCu.HK.3vsDM.3	1001	1.29133	14.4081	12.7714	0.000551762	0.00180978	1	Petaluma_1
L2_LpH.HCu.HK.3vsDM.3	1017	-1.84587	11.6835	18.4749	4.11759e-05	0.000198613	-1	Petaluma_2
L2_LpH.HCu.HK.3vsDM.3	1082	0.365923	11.4201	0.531652	0.467681	0.589997	0	NCYC_761
L2_LpH.HCu.HK.3vsDM.3	1427	8.10328	5.90529	8.12411	0.00557911	0.0147576	1	Lalvin_WSK.27
L2_LpH.HCu.HK.3vsDM.3	1429	2.49344	11.2899	38.0111	1.63821e-08	1.67917e-07	1	Lalvin_DV10
L2_LpH.HCu.HK.3vsDM.3	1432	5.44649	17.1976	47.3368	2.70084e-09	3.16384e-08	1	Vin_7
L2_LpH.HCu.HK.3vsDM.3	1436	-2.64891	9.00798	5.38627	0.0224033	0.0483441	-1	Lalvin_S6U
L2_LpH.HCu.HK.3vsDM.3	1482	3.37694	8.32438	3.65883	0.0588037	0.104194	0	C_Todd_1
L2_LpH.HCu.HK.3vsDM.3	1483	-1.25414	12.8932	7.33116	0.00806718	0.0200457	-1	Lalvin_ICV_D254
L2_LpH.HCu.HK.3vsDM.3	1485	-1.00862	10.5647	2.62701	0.108326	0.177655	0	Lalvin_RC212
L2_LpH.HCu.HK.3vsDM.3	1486	-1.58772	11.7848	13.7742	0.000344955	0.00122984	-1	Lalvin_BM45
L2_LpH.HCu.HK.3vsDM.3	1487	-1.46895	12.3208	16.994	7.94279e-05	0.000361838	-1	Lalvin_Rhone_L2056
L2_LpH.HCu.HK.3vsDM.3	1488	-1.03356	14.2648	5.2584	0.024113	0.0502025	0	Lalvin_ICV_D47
L2_LpH.HCu.HK.3vsDM.3	1490	1.32797	12.6662	4.36848	0.0404854	0.0772047	0	Lalvin_Rhone_L2323
L2_LpH.HCu.HK.3vsDM.3	1491	1.36848	6.31971	0.382131	0.53812	0.644595	0	Uvaferm_BDX
L2_LpH.HCu.HK.3vsDM.3	1493	-0.588362	8.69811	0.270759	0.604016	0.686547	0	Lalvin_71B
L2_LpH.HCu.HK.3vsDM.3	1497	-1.69688	12.8887	14.3982	0.000258496	0.000963484	-1	Lalvin_T73
L2_LpH.HCu.HK.3vsDM.3	1502	0.445065	9.63531	0.345643	0.557965	0.653616	0	Fusion
L2_LpH.HCu.HK.3vsDM.3	1503	0.763784	11.669	3.8872	0.0515218	0.0938843	0	X1503
L2_LpH.HCu.HK.3vsDM.3	1504	1.3779	12.3406	16.3083	0.000108076	0.000443113	1	X1504
L2_LpH.HCu.HK.3vsDM.3	1505	0.980333	9.20822	2.37368	0.126672	0.195983	0	Cerebray
L2_LpH.HCu.HK.3vsDM.3	1537	-1.47565	10.8618	7.13888	0.00885665	0.0213602	-1	Vin_13
L2_LpH.HCu.HK.3vsDM.3	1688	-1.16854	8.44622	1.71366	0.193624	0.28352	0	Zymaflore_VL3c
L2_LpH.HCu.HK.3vsDM.3	1706	0.845357	14.1311	1.67748	0.199794	0.287423	0	unknown
L2_LpH.HCu.HK.3vsDM.3	1709	-1.71522	9.23605	3.63018	0.0597209	0.104194	0	Wolf
L2_LpH.HCu.HK.3vsDM.3	1712	5.03642	18.9672	112.268	7.48628e-18	1.53469e-16	1	YW8134
L2_LpH.HCu.HK.3vsDM.3	1716	-7.30442	5.7749	0.30636	0.581679	0.671798	0	Petaluma_1A
L2_LpH.HCu.HK.3vsDM.3	1722	-6.42253	6.74579	0.13505	0.714151	0.760906	0	CBS_7045
L2_LpH.HCu.HK.3vsDM.3	1729	0.581238	9.97044	0.260133	0.611195	0.686547	0	YW8003
L2_LpH.HCu.HK.3vsDM.3	1736	-3.4559	9.42315	11.2321	0.00115746	0.00351525	-1	YW8154
L2_LpH.HCu.HK.3vsDM.3	1742	2.63352	9.70737	11.0309	0.00132692	0.00388599	1	YW8205
L2_LpH.HCu.HK.3vsDM.3	1756	-2.42271	12.5957	32.8687	1.12855e-07	1.02823e-06	-1	Morey_St_Denis
L2_LpH.HCu.HK.3vsDM.3	1757	-0.343929	7.69101	0.0335802	0.855013	0.887482	0	Chateau_d.Yquem
L2_LpH.HCu.HK.3vsDM.3	1758	-1.31548	11.3896	6.86807	0.0102822	0.0240897	-1	Haut.Brion_1
L2_LpH.HCu.HK.3vsDM.3	1759	-0.740018	7.27326	0.428524	0.514273	0.629409	0	Chateau_Cantemerle
L2_LpH.HCu.HK.3vsDM.3	1760	0.0223236	12.8128	0.00090181	0.976133	0.988184	0	Gruaud_Larose
L2_LpH.HCu.HK.3vsDM.3	1776	0.375284	8.2697	0.151411	0.698048	0.760906	0	Massey_GF7
L2_LpH.HCu.HK.3vsDM.3	1778	-2.9632	9.98865	9.14103	0.00320241	0.00905508	-1	Massey_GF8C
L2_LpH.HCu.HK.3vsDM.3	1781	-0.00414727	9.72901	3.28658e-05	0.995438	0.995438	0	YW8316_Yquem
L2_LpH.HCu.HK.3vsDM.3	1795	5.05672	17.0266	169.153	6.19948e-23	2.54179e-21	1	Henri.Martin_8130
L2_LpH.HCu.HK.3vsDM.3	1796	1.97297	13.7174	30.3359	3.0124e-07	2.47017e-06	1	YW8413
L2_LpH.HCu.HK.3vsDM.3	1833	-8.78409	6.76672	0.537377	0.465377	0.589997	0	Uvaferm_43
L2_LpH.HCu.HK.3vsDM.3	1910	4.16998	18.5303	75.1408	1.04334e-13	1.71108e-12	1	NCYC_738.1
L2_LpH.HCu.HK.3vsDM.3	1918	1.84756	7.36769	2.57882	0.111654	0.179521	0	DSIR_Wine_Research__R102
L2_LpH.HCu.HK.3vsDM.3	2013	-1.29284	8.44571	1.56776	0.213562	0.301932	0	Blastocel_Grand_Cru
L2_LpH.HCu.HK.3vsDM.3	2078	-1.38096	13.5547	14.9918	0.000196612	0.000767725	-1	Lalvin_CY3079
L2_LpH.HCu.HK.3vsDM.3	2079	-1.90804	7.66504	1.85715	0.176129	0.262592	0	Enoferm_T306
L2_LpH.HCu.HK.3vsDM.3	2260	2.86707	13.8338	56.8719	2.5705e-11	3.51301e-10	1	Lalvin_QA23
L2_LpH.HCu.HK.3vsDM.3	2308	-1.31339	11.9837	12.3671	0.000668005	0.00210679	-1	Brocksopp_1
L2_LpH.HCu.HK.3vsDM.3	2776	-1.07279	12.7079	4.27231	0.0418118	0.0779219	0	NT_116
L2_LpH.HCu.HK.3vsDM.3	2851	-2.40351	13.0713	29.7832	3.74303e-07	2.79026e-06	-1	Actiflore_Rose
L2_LpH.HCu.HK.3vsDM.3	2852	-8.15313	7.4168	0.373871	0.542403	0.644595	0	Zymaflore_F15
L2_LpH.HCu.HK.3vsDM.3	2858	-0.702712	11.3791	2.10376	0.150183	0.228056	0	Zymaflore_VL1
L2_LpH.HCu.HK.3vsDM.3	2861	-2.43539	11.2167	18.7359	3.67138e-05	0.000188158	-1	Zymaflore_X5
L2_LpH.HCu.HK.3vsDM.3	2863	0.90063	8.58421	1.51633	0.221171	0.307391	0	Collection_Cepage_Chardonnay
L2_LpH.HCu.HK.3vsDM.3	2866	3.87557	13.0298	29.4674	8.84764e-07	5.18219e-06	1	Collection_Cepage_Sauvignon_Blanc
L2_LpH.HCu.HK.3vsDM.3	2867	-0.165473	11.2605	0.190767	0.663256	0.734959	0	Collection_Cepage_Syrah
L2_LpH.HCu.HK.3vsDM.3	2874	-0.704526	8.78643	0.542876	0.463033	0.589997	0	Fermicru_VR5
L2_LpH.HCu.HK.3vsDM.3	2878	-0.504834	10.9077	0.975901	0.325686	0.437807	0	NT_112
L2_LpH.HCu.HK.3vsDM.3	2880	0.593011	12.3641	3.23772	0.0750892	0.127685	0	NT_50
L2_LpH.HCu.HK.3vsDM.3	2881	-12.135	8.912	6.72267	0.0110331	0.0244516	-1	Vin_2000
L2_LpH.HCu.HK.3vsDM.3	2910	1.8612	13.8444	29.1632	4.78153e-07	3.26738e-06	1	Maurivin_Elegance
L2_LpH.HCu.HK.3vsDM.3	2913	9.73398	7.0017	8.5646	0.00442834	0.0121041	1	Maurivin_Sauvignon
L2_LpH.HCu.HK.3vsDM.3	2914	-1.89087	11.627	19.1583	3.05168e-05	0.000166825	-1	Maurivin_UOA_Maxithiol
L4_DM.3vsDM.1	81	0.556896	10.2637	4.90452	0.0298132	0.0394304	1	X81_Brelez
L4_DM.3vsDM.1	170	-2.06729	9.02301	63.3561	1.39491e-11	6.35458e-11	-1	Sep_1
L4_DM.3vsDM.1	213	-3.61587	6.79977	129.176	5.34309e-18	5.47667e-17	-1	Tintara_1953
L4_DM.3vsDM.1	228	1.11595	16.2074	12.9398	0.000572781	0.00102104	1	Stoneyfell_1949
L4_DM.3vsDM.1	266	-2.31955	8.02461	82.0052	1.13385e-13	6.64113e-13	-1	X266
L4_DM.3vsDM.1	722	-0.513551	10.0121	5.93535	0.0172051	0.0239122	-1	X722
L4_DM.3vsDM.1	724	-0.309524	9.31839	1.34698	0.249475	0.272759	0	Bright_Tokay6
L4_DM.3vsDM.1	735	-2.81059	11.6319	155.97	5.02854e-20	5.89057e-19	-1	Beech_Wadenswil
L4_DM.3vsDM.1	740	-0.854603	9.67305	15.1811	0.000210064	0.000430631	-1	Trier_25
L4_DM.3vsDM.1	763	-1.42258	10.0969	33.317	1.6489e-07	5.87869e-07	-1	X763
L4_DM.3vsDM.1	778	-5.08034	8.9594	365.876	1.26515e-30	5.18714e-29	-1	X778
L4_DM.3vsDM.1	796	0.6553	16.7048	3.48473	0.0658325	0.0782358	0	X796
L4_DM.3vsDM.1	833	-2.96298	7.80541	106.286	4.83307e-16	3.60283e-15	-1	Penfolds_B
L4_DM.3vsDM.1	838	-0.393203	12.6389	3.59611	0.0617532	0.0744671	0	X838
L4_DM.3vsDM.1	896	0.484885	11.7273	4.83449	0.0309688	0.0396788	1	X896
L4_DM.3vsDM.1	934	1.23465	10.4597	22.2393	1.08351e-05	2.77651e-05	1	UCD_48.41
L4_DM.3vsDM.1	935	-10.136	7.12634	206.264	1.94967e-22	2.66455e-21	-1	UCD_C.9
L4_DM.3vsDM.1	947	0.704561	13.1578	5.54091	0.0211884	0.0284828	1	Beech_729
L4_DM.3vsDM.1	1001	0.213823	14.3508	0.557999	0.457395	0.480851	0	Petaluma_1
L4_DM.3vsDM.1	1017	0.571328	13.4601	4.84969	0.0307141	0.0396788	1	Petaluma_2
L4_DM.3vsDM.1	1082	-2.85293	11.7742	87.4015	4.06571e-14	2.56452e-13	-1	NCYC_761
L4_DM.3vsDM.1	1427	-8.97852	7.14826	278.408	5.30398e-27	1.44975e-25	-1	Lalvin_WSK.27
L4_DM.3vsDM.1	1429	-0.717151	11.6023	6.60985	0.0121746	0.0175143	-1	Lalvin_DV10
L4_DM.3vsDM.1	1432	1.9154	12.735	47.3796	1.51433e-09	6.20875e-09	1	Vin_7
L4_DM.3vsDM.1	1436	-0.706005	10.3118	10.7678	0.0015671	0.00251965	-1	Lalvin_S6U
L4_DM.3vsDM.1	1482	-6.04511	9.47121	450.402	1.70001e-33	1.394e-31	-1	C_Todd_1
L4_DM.3vsDM.1	1483	-1.13571	15.0822	11.2413	0.00125445	0.00208339	-1	Lalvin_ICV_D254
L4_DM.3vsDM.1	1485	-1.52219	13.5687	20.719	2.07307e-05	4.85691e-05	-1	Lalvin_RC212
L4_DM.3vsDM.1	1486	1.54222	13.6739	21.9401	1.22214e-05	3.03683e-05	1	Lalvin_BM45
L4_DM.3vsDM.1	1487	1.43576	15.2862	13.5903	0.000433615	0.000826893	1	Lalvin_Rhone_L2056
L4_DM.3vsDM.1	1488	1.70472	15.732	17.6523	7.39437e-05	0.000159563	1	Lalvin_ICV_D47
L4_DM.3vsDM.1	1490	0.797697	14.6798	6.11021	0.0156999	0.0221965	1	Lalvin_Rhone_L2323
L4_DM.3vsDM.1	1491	-2.29185	8.08661	78.3694	2.76282e-13	1.51034e-12	-1	Uvaferm_BDX
L4_DM.3vsDM.1	1493	-2.07056	9.88964	55.3941	1.33876e-10	5.7778e-10	-1	Lalvin_71B
L4_DM.3vsDM.1	1497	1.86068	15.177	32.9441	1.88359e-07	6.43558e-07	1	Lalvin_T73
L4_DM.3vsDM.1	1502	-1.22985	8.81571	25.0214	3.60867e-06	1.02038e-05	-1	Fusion
L4_DM.3vsDM.1	1503	-0.11017	13.1031	0.184006	0.669178	0.677439	0	X1503
L4_DM.3vsDM.1	1504	-0.830411	12.7703	11.7892	0.000971814	0.00166018	-1	X1504
L4_DM.3vsDM.1	1505	-1.26783	9.83796	28.5833	9.27752e-07	2.81762e-06	-1	Cerebray
L4_DM.3vsDM.1	1537	0.835064	13.5001	9.22833	0.00327453	0.00506626	1	Vin_13
L4_DM.3vsDM.1	1688	-0.144904	10.3066	0.343043	0.55983	0.58109	0	Zymaflore_VL3c
L4_DM.3vsDM.1	1706	0.93966	15.2882	8.45412	0.00478356	0.00726393	1	unknown
L4_DM.3vsDM.1	1709	0.321999	10.4872	2.01152	0.160237	0.179992	0	Wolf
L4_DM.3vsDM.1	1712	1.17072	15.9785	14.8448	0.000243668	0.000487335	1	YW8134
L4_DM.3vsDM.1	1716	-2.66139	6.80763	76.8714	4.01283e-13	2.05657e-12	-1	Petaluma_1A
L4_DM.3vsDM.1	1722	-3.12293	6.9988	108.002	3.38148e-16	2.77281e-15	-1	CBS_7045
L4_DM.3vsDM.1	1729	-2.91535	10.1146	108.24	3.21874e-16	2.77281e-15	-1	YW8003
L4_DM.3vsDM.1	1736	1.04721	11.0863	18.5588	4.91494e-05	0.000108926	1	YW8154
L4_DM.3vsDM.1	1742	-1.12608	9.27417	13.7126	0.00041048	0.000801413	-1	YW8205
L4_DM.3vsDM.1	1756	1.67291	16.5786	24.6713	4.13604e-06	1.13052e-05	1	Morey_St_Denis
L4_DM.3vsDM.1	1757	-0.431116	9.43894	2.27212	0.135906	0.154782	0	Chateau_d.Yquem
L4_DM.3vsDM.1	1758	1.96134	15.0999	31.5965	3.05958e-07	1.00354e-06	1	Haut.Brion_1
L4_DM.3vsDM.1	1759	2.64807	10.2459	86.7159	3.68793e-14	2.52009e-13	1	Chateau_Cantemerle
L4_DM.3vsDM.1	1760	1.45811	11.7404	41.386	1.03845e-08	4.05491e-08	1	Gruaud_Larose
L4_DM.3vsDM.1	1776	-0.243611	8.58326	0.733883	0.394347	0.419954	0	Massey_GF7
L4_DM.3vsDM.1	1778	0.670535	11.6879	9.55832	0.00279102	0.00440123	1	Massey_GF8C
L4_DM.3vsDM.1	1781	-0.503171	10.9032	4.80085	0.0315409	0.0397901	-1	YW8316_Yquem
L4_DM.3vsDM.1	1795	0.739486	15.217	7.08392	0.00950404	0.0139166	1	Henri.Martin_8130
L4_DM.3vsDM.1	1796	0.569509	13.6761	3.71989	0.0575393	0.0704213	0	YW8413
L4_DM.3vsDM.1	1833	-2.25339	8.50021	69.6309	2.57459e-12	1.24186e-11	-1	Uvaferm_43
L4_DM.3vsDM.1	1910	0.419124	14.6792	1.80519	0.183124	0.202921	0	NCYC_738.1
L4_DM.3vsDM.1	1918	-1.26965	9.19316	29.7453	6.02338e-07	1.89968e-06	-1	DSIR_Wine_Research__R102
L4_DM.3vsDM.1	2013	0.540878	9.66121	4.02542	0.0484127	0.0601491	0	Blastocel_Grand_Cru
L4_DM.3vsDM.1	2078	1.99364	16.6429	25.9123	2.55632e-06	7.48635e-06	1	Lalvin_CY3079
L4_DM.3vsDM.1	2079	0.975859	9.39686	13.413	0.00046215	0.00086128	1	Enoferm_T306
L4_DM.3vsDM.1	2260	0.45816	13.3676	2.70532	0.104185	0.120326	0	Lalvin_QA23
L4_DM.3vsDM.1	2308	1.50677	14.8535	21.0612	1.745e-05	4.20854e-05	1	Brocksopp_1
L4_DM.3vsDM.1	2776	0.273578	14.7768	0.934147	0.336883	0.36348	0	NT_116
L4_DM.3vsDM.1	2851	2.10777	16.7016	22.4096	1.05003e-05	2.77651e-05	1	Actiflore_Rose
L4_DM.3vsDM.1	2852	-4.45829	8.83308	232.364	1.02963e-24	2.11075e-23	-1	Zymaflore_F15
L4_DM.3vsDM.1	2858	-0.660365	13.2464	8.23388	0.00533414	0.00795271	-1	Zymaflore_VL1
L4_DM.3vsDM.1	2861	1.17592	13.9785	13.0571	0.000543028	0.000989518	1	Zymaflore_X5
L4_DM.3vsDM.1	2863	-0.921132	10.0372	11.2144	0.00127036	0.00208339	-1	Collection_Cepage_Chardonnay
L4_DM.3vsDM.1	2866	0.8986	10.3161	11.9097	0.000919058	0.00160346	1	Collection_Cepage_Sauvignon_Blanc
L4_DM.3vsDM.1	2867	0.87409	13.34	17.46	7.82669e-05	0.000164561	1	Collection_Cepage_Syrah
L4_DM.3vsDM.1	2874	-0.588782	9.61594	5.59652	0.0205723	0.0281154	-1	Fermicru_VR5
L4_DM.3vsDM.1	2878	-1.08039	12.098	19.5109	3.30172e-05	7.52059e-05	-1	NT_112
L4_DM.3vsDM.1	2880	-1.6671	13.0355	38.6345	2.60369e-08	9.70467e-08	-1	NT_50
L4_DM.3vsDM.1	2881	-0.015707	10.4215	0.00516155	0.942917	0.942917	0	Vin_2000
L4_DM.3vsDM.1	2910	-0.123667	14.0684	0.185219	0.668156	0.677439	0	Maurivin_Elegance
L4_DM.3vsDM.1	2913	-9.81294	7.50227	219.943	1.02501e-22	1.68101e-21	-1	Maurivin_Sauvignon
L4_DM.3vsDM.1	2914	0.633736	14.6977	3.41659	0.0684724	0.0802105	0	Maurivin_UOA_Maxithiol
L4_Temp12.3vsDM.3	81	-0.592329	10.2637	3.14621	0.0801488	0.298438	0	X81_Brelez
L4_Temp12.3vsDM.3	170	-0.00509636	9.02301	0.000205948	0.988588	0.990685	0	Sep_1
L4_Temp12.3vsDM.3	213	-1.07373	6.79977	5.25058	0.0247386	0.202857	0	Tintara_1953
L4_Temp12.3vsDM.3	228	0.247533	16.2074	0.381561	0.538634	0.65535	0	Stoneyfell_1949
L4_Temp12.3vsDM.3	266	-1.09731	8.02461	9.6119	0.0027198	0.0512964	0	X266
L4_Temp12.3vsDM.3	722	-0.525761	10.0121	3.35995	0.070755	0.290096	0	X722
L4_Temp12.3vsDM.3	724	-0.561523	9.31839	2.41261	0.124557	0.298438	0	Bright_Tokay6
L4_Temp12.3vsDM.3	735	0.817867	11.6319	7.53582	0.00756029	0.0885633	0	Beech_Wadenswil
L4_Temp12.3vsDM.3	740	-0.279331	9.67305	0.875448	0.352444	0.535193	0	Trier_25
L4_Temp12.3vsDM.3	763	0.195956	10.0969	0.343719	0.559445	0.65535	0	X763
L4_Temp12.3vsDM.3	778	-0.215308	8.9594	0.394583	0.531802	0.65535	0	X778
L4_Temp12.3vsDM.3	796	0.0715589	16.7048	0.024001	0.877297	0.922287	0	X796
L4_Temp12.3vsDM.3	833	-1.2043	7.80541	9.15968	0.00338565	0.0512964	0	Penfolds_B
L4_Temp12.3vsDM.3	838	0.107446	12.6389	0.147158	0.702348	0.788939	0	X838
L4_Temp12.3vsDM.3	896	-0.156627	11.7273	0.287061	0.59369	0.68567	0	X896
L4_Temp12.3vsDM.3	934	-0.201857	10.4597	0.356942	0.552003	0.65535	0	UCD_48.41
L4_Temp12.3vsDM.3	935	1.37759	7.12634	0.694096	0.407643	0.54798	0	UCD_C.9
L4_Temp12.3vsDM.3	947	-0.347826	13.1578	0.777135	0.380826	0.546732	0	Beech_729
L4_Temp12.3vsDM.3	1001	0.581288	14.3508	2.33089	0.131021	0.298438	0	Petaluma_1
L4_Temp12.3vsDM.3	1017	-0.528582	13.4601	2.35987	0.128686	0.298438	0	Petaluma_2
L4_Temp12.3vsDM.3	1082	1.20708	11.7742	8.96469	0.0037534	0.0512964	0	NCYC_761
L4_Temp12.3vsDM.3	1427	0.768429	7.14826	0.470851	0.494705	0.643901	0	Lalvin_WSK.27
L4_Temp12.3vsDM.3	1429	-0.224562	11.6023	0.350442	0.555689	0.65535	0	Lalvin_DV10
L4_Temp12.3vsDM.3	1432	-0.294743	12.735	0.716287	0.400048	0.546732	0	Vin_7
L4_Temp12.3vsDM.3	1436	-0.354936	10.3118	1.47045	0.229067	0.457409	0	Lalvin_S6U
L4_Temp12.3vsDM.3	1482	-0.320703	9.47121	0.780082	0.379929	0.546732	0	C_Todd_1
L4_Temp12.3vsDM.3	1483	0.43874	15.0822	0.911775	0.342701	0.530217	0	Lalvin_ICV_D254
L4_Temp12.3vsDM.3	1485	0.51682	13.5687	1.30201	0.257568	0.457409	0	Lalvin_RC212
L4_Temp12.3vsDM.3	1486	-0.492815	13.6739	1.3768	0.244348	0.457409	0	Lalvin_BM45
L4_Temp12.3vsDM.3	1487	1.23333	15.2862	6.21442	0.0149348	0.136072	0	Lalvin_Rhone_L2056
L4_Temp12.3vsDM.3	1488	0.858722	15.732	2.84181	0.0961021	0.298438	0	Lalvin_ICV_D47
L4_Temp12.3vsDM.3	1490	-0.259912	14.6798	0.376571	0.541295	0.65535	0	Lalvin_Rhone_L2323
L4_Temp12.3vsDM.3	1491	-0.144366	8.08661	0.169108	0.682075	0.776807	0	Uvaferm_BDX
L4_Temp12.3vsDM.3	1493	-0.433664	9.88964	1.32058	0.254128	0.457409	0	Lalvin_71B
L4_Temp12.3vsDM.3	1497	-0.00475403	15.177	0.00013722	0.990685	0.990685	0	Lalvin_T73
L4_Temp12.3vsDM.3	1502	-0.343004	8.81571	1.05011	0.308764	0.496445	0	Fusion
L4_Temp12.3vsDM.3	1503	1.17964	13.1031	11.7773	0.00097718	0.0400644	1	X1503
L4_Temp12.3vsDM.3	1504	-0.0114875	12.7703	0.00122224	0.972204	0.990685	0	X1504
L4_Temp12.3vsDM.3	1505	0.720553	9.83796	5.0445	0.0276386	0.206033	0	Cerebray
L4_Temp12.3vsDM.3	1537	0.231496	13.5001	0.415633	0.521085	0.65535	0	Vin_13
L4_Temp12.3vsDM.3	1688	-0.0709527	10.3066	0.0454152	0.831819	0.897488	0	Zymaflore_VL3c
L4_Temp12.3vsDM.3	1706	-0.0697489	15.2882	0.0274119	0.868943	0.922287	0	unknown
L4_Temp12.3vsDM.3	1709	-0.417973	10.4872	1.90184	0.171958	0.381096	0	Wolf
L4_Temp12.3vsDM.3	1712	0.106508	15.9785	0.0738394	0.786571	0.871605	0	YW8134
L4_Temp12.3vsDM.3	1716	-0.561313	6.80763	1.78039	0.186124	0.401637	0	Petaluma_1A
L4_Temp12.3vsDM.3	1722	-1.42357	6.9988	10.885	0.00148285	0.0405312	-1	CBS_7045
L4_Temp12.3vsDM.3	1729	-0.0927678	10.1146	0.06205	0.803963	0.879	0	YW8003
L4_Temp12.3vsDM.3	1736	-0.617709	11.0863	3.79042	0.0552783	0.280382	0	YW8154
L4_Temp12.3vsDM.3	1742	-0.477378	9.27417	1.32086	0.254182	0.457409	0	YW8205
L4_Temp12.3vsDM.3	1756	0.735981	16.5786	3.01888	0.0863909	0.298438	0	Morey_St_Denis
L4_Temp12.3vsDM.3	1757	-0.823002	9.43894	4.4614	0.037987	0.259578	0	Chateau_d.Yquem
L4_Temp12.3vsDM.3	1758	0.385247	15.0999	0.789781	0.376998	0.546732	0	Haut.Brion_1
L4_Temp12.3vsDM.3	1759	-0.338684	10.2459	0.961696	0.329902	0.52023	0	Chateau_Cantemerle
L4_Temp12.3vsDM.3	1760	-0.378154	11.7404	1.69971	0.1963	0.402414	0	Gruaud_Larose
L4_Temp12.3vsDM.3	1776	-0.505292	8.58326	1.72303	0.193293	0.402414	0	Massey_GF7
L4_Temp12.3vsDM.3	1778	-0.4873	11.6879	2.89146	0.0931796	0.298438	0	Massey_GF8C
L4_Temp12.3vsDM.3	1781	-0.645115	10.9032	4.25535	0.0425772	0.268564	0	YW8316_Yquem
L4_Temp12.3vsDM.3	1795	0.604986	15.217	2.77041	0.10018	0.298438	0	Henri.Martin_8130
L4_Temp12.3vsDM.3	1796	0.63384	13.6761	2.66163	0.106973	0.298438	0	YW8413
L4_Temp12.3vsDM.3	1833	-0.60959	8.50021	2.72383	0.103029	0.298438	0	Uvaferm_43
L4_Temp12.3vsDM.3	1910	0.633326	14.6792	2.35844	0.1288	0.298438	0	NCYC_738.1
L4_Temp12.3vsDM.3	1918	-0.272102	9.19316	0.73536	0.393874	0.546732	0	DSIR_Wine_Research__R102
L4_Temp12.3vsDM.3	2013	-0.399281	9.66121	1.24662	0.267752	0.457409	0	Blastocel_Grand_Cru
L4_Temp12.3vsDM.3	2078	0.556888	16.6429	1.31661	0.254836	0.457409	0	Lalvin_CY3079
L4_Temp12.3vsDM.3	2079	-0.583239	9.39686	2.78971	0.0990256	0.298438	0	Enoferm_T306
L4_Temp12.3vsDM.3	2260	0.676077	13.3676	3.37997	0.0699389	0.290096	0	Lalvin_QA23
L4_Temp12.3vsDM.3	2308	-0.470338	14.8535	1.2577	0.265652	0.457409	0	Brocksopp_1
L4_Temp12.3vsDM.3	2776	-0.272561	14.7768	0.520123	0.473024	0.625612	0	NT_116
L4_Temp12.3vsDM.3	2851	0.842915	16.7016	2.36512	0.128389	0.298438	0	Actiflore_Rose
L4_Temp12.3vsDM.3	2852	-0.764389	8.83308	3.89283	0.0521652	0.280382	0	Zymaflore_F15
L4_Temp12.3vsDM.3	2858	-0.620891	13.2464	3.91229	0.0515953	0.280382	0	Zymaflore_VL1
L4_Temp12.3vsDM.3	2861	0.358745	13.9785	0.732687	0.394731	0.546732	0	Zymaflore_X5
L4_Temp12.3vsDM.3	2863	-0.3944	10.0372	1.10503	0.296529	0.486308	0	Collection_Cepage_Chardonnay
L4_Temp12.3vsDM.3	2866	-0.035283	10.3161	0.0107784	0.917589	0.952434	0	Collection_Cepage_Sauvignon_Blanc
L4_Temp12.3vsDM.3	2867	-0.418724	13.34	2.3319	0.130939	0.298438	0	Collection_Cepage_Syrah
L4_Temp12.3vsDM.3	2874	-0.652585	9.61594	3.70202	0.0581279	0.280382	0	Fermicru_VR5
L4_Temp12.3vsDM.3	2878	-1.43644	12.098	18.049	6.09412e-05	0.00499718	-1	NT_112
L4_Temp12.3vsDM.3	2880	-0.562601	13.0355	2.36559	0.128232	0.298438	0	NT_50
L4_Temp12.3vsDM.3	2881	-0.760971	10.4215	6.62695	0.0120094	0.123096	0	Vin_2000
L4_Temp12.3vsDM.3	2910	0.633003	14.0684	2.70036	0.104498	0.298438	0	Maurivin_Elegance
L4_Temp12.3vsDM.3	2913	1.52433	7.50227	1.21954	0.273451	0.457612	0	Maurivin_Sauvignon
L4_Temp12.3vsDM.3	2914	0.843313	14.6977	3.5142	0.0647255	0.290096	0	Maurivin_UOA_Maxithiol
L4_HS.Temp12.3vsDM.3	81	-0.335205	10.2637	1.00802	0.318595	0.480056	0	X81_Brelez
L4_HS.Temp12.3vsDM.3	170	-0.563997	9.02301	2.45013	0.121711	0.27723	0	Sep_1
L4_HS.Temp12.3vsDM.3	213	-2.63068	6.79977	15.9764	0.000148315	0.00243236	-1	Tintara_1953
L4_HS.Temp12.3vsDM.3	228	0.841529	16.2074	4.43229	0.0386021	0.125017	0	Stoneyfell_1949
L4_HS.Temp12.3vsDM.3	266	-1.98998	8.02461	25.8343	2.63432e-06	0.000108007	-1	X266
L4_HS.Temp12.3vsDM.3	722	-0.0189152	10.0121	0.00436221	0.947516	0.983497	0	X722
L4_HS.Temp12.3vsDM.3	724	0.0275599	9.31839	0.00582203	0.939381	0.983497	0	Bright_Tokay6
L4_HS.Temp12.3vsDM.3	735	-0.234555	11.6319	0.606674	0.438485	0.569834	0	Beech_Wadenswil
L4_HS.Temp12.3vsDM.3	740	-0.00771091	9.67305	0.000661154	0.979554	0.984484	0	Trier_25
L4_HS.Temp12.3vsDM.3	763	-0.613012	10.0969	3.25259	0.0753128	0.181637	0	X763
L4_HS.Temp12.3vsDM.3	778	-1.42879	8.9594	12.388	0.000737152	0.0100744	-1	X778
L4_HS.Temp12.3vsDM.3	796	0.846291	16.7048	3.38149	0.0698773	0.173634	0	X796
L4_HS.Temp12.3vsDM.3	833	-2.12427	7.80541	21.063	1.74377e-05	0.000476629	-1	Penfolds_B
L4_HS.Temp12.3vsDM.3	838	-0.0232997	12.6389	0.00689523	0.934042	0.983497	0	X838
L4_HS.Temp12.3vsDM.3	896	-0.36891	11.7273	1.58329	0.212178	0.370183	0	X896
L4_HS.Temp12.3vsDM.3	934	-0.230254	10.4597	0.462726	0.49844	0.610031	0	UCD_48.41
L4_HS.Temp12.3vsDM.3	935	1.63288	7.12634	0.634055	0.428597	0.569834	0	UCD_C.9
L4_HS.Temp12.3vsDM.3	947	-0.30243	13.1578	0.587775	0.445679	0.569834	0	Beech_729
L4_HS.Temp12.3vsDM.3	1001	0.167366	14.3508	0.192351	0.662223	0.764821	0	Petaluma_1
L4_HS.Temp12.3vsDM.3	1017	-0.287416	13.4601	0.700612	0.405228	0.563198	0	Petaluma_2
L4_HS.Temp12.3vsDM.3	1082	0.306666	11.7742	0.572499	0.451698	0.569834	0	NCYC_761
L4_HS.Temp12.3vsDM.3	1427	1.29034	7.14826	0.993887	0.321989	0.480056	0	Lalvin_WSK.27
L4_HS.Temp12.3vsDM.3	1429	-0.794825	11.6023	4.31594	0.0412679	0.125017	0	Lalvin_DV10
L4_HS.Temp12.3vsDM.3	1432	-0.732957	12.735	4.38801	0.039558	0.125017	0	Vin_7
L4_HS.Temp12.3vsDM.3	1436	0.00570936	10.3118	0.000380751	0.984484	0.984484	0	Lalvin_S6U
L4_HS.Temp12.3vsDM.3	1482	0.505461	9.47121	1.8153	0.181916	0.357705	0	C_Todd_1
L4_HS.Temp12.3vsDM.3	1483	1.17087	15.0822	6.52078	0.0126852	0.0577883	0	Lalvin_ICV_D254
L4_HS.Temp12.3vsDM.3	1485	1.23373	13.5687	7.44495	0.00796175	0.0460526	1	Lalvin_RC212
L4_HS.Temp12.3vsDM.3	1486	0.557117	13.6739	1.78505	0.185557	0.357705	0	Lalvin_BM45
L4_HS.Temp12.3vsDM.3	1487	0.99935	15.2862	4.07833	0.0471008	0.133182	0	Lalvin_Rhone_L2056
L4_HS.Temp12.3vsDM.3	1488	0.531548	15.732	1.08645	0.300693	0.465222	0	Lalvin_ICV_D47
L4_HS.Temp12.3vsDM.3	1490	0.485756	14.6798	1.32801	0.252808	0.406475	0	Lalvin_Rhone_L2323
L4_HS.Temp12.3vsDM.3	1491	0.337961	8.08661	0.900042	0.345807	0.497477	0	Uvaferm_BDX
L4_HS.Temp12.3vsDM.3	1493	-0.372477	9.88964	0.957393	0.33098	0.484649	0	Lalvin_71B
L4_HS.Temp12.3vsDM.3	1497	-0.00909646	15.177	0.000502666	0.982172	0.984484	0	Lalvin_T73
L4_HS.Temp12.3vsDM.3	1502	-1.45593	8.81571	17.3253	8.29006e-05	0.00169946	-1	Fusion
L4_HS.Temp12.3vsDM.3	1503	0.754811	13.1031	4.81081	0.0313703	0.116926	0	X1503
L4_HS.Temp12.3vsDM.3	1504	-0.488318	12.7703	2.18747	0.143311	0.317608	0	X1504
L4_HS.Temp12.3vsDM.3	1505	-0.643102	9.83796	3.84806	0.0535023	0.14624	0	Cerebray
L4_HS.Temp12.3vsDM.3	1537	0.432159	13.5001	1.45121	0.232108	0.380657	0	Vin_13
L4_HS.Temp12.3vsDM.3	1688	0.222178	10.3066	0.445193	0.506667	0.610981	0	Zymaflore_VL3c
L4_HS.Temp12.3vsDM.3	1706	1.07513	15.2882	6.58003	0.0123033	0.0577883	0	unknown
L4_HS.Temp12.3vsDM.3	1709	-0.443201	10.4872	2.1272	0.148866	0.321236	0	Wolf
L4_HS.Temp12.3vsDM.3	1712	0.944291	15.9785	5.84663	0.0180264	0.077798	0	YW8134
L4_HS.Temp12.3vsDM.3	1716	-1.65201	6.80763	10.6642	0.00164576	0.0149947	-1	Petaluma_1A
L4_HS.Temp12.3vsDM.3	1722	-1.73487	6.9988	11.8088	0.000963026	0.0112812	-1	CBS_7045
L4_HS.Temp12.3vsDM.3	1729	-1.13012	10.1146	8.57436	0.00450834	0.0363029	-1	YW8003
L4_HS.Temp12.3vsDM.3	1736	-0.861813	11.0863	7.31844	0.00843734	0.0460526	-1	YW8154
L4_HS.Temp12.3vsDM.3	1742	-0.341035	9.27417	0.662675	0.418259	0.569834	0	YW8205
L4_HS.Temp12.3vsDM.3	1756	1.41721	16.5786	11.2162	0.00126929	0.0130102	1	Morey_St_Denis
L4_HS.Temp12.3vsDM.3	1757	0.124397	9.43894	0.102853	0.749322	0.853394	0	Chateau_d.Yquem
L4_HS.Temp12.3vsDM.3	1758	1.17171	15.0999	7.34089	0.00834199	0.0460526	1	Haut.Brion_1
L4_HS.Temp12.3vsDM.3	1759	-0.236763	10.2459	0.469683	0.495239	0.610031	0	Chateau_Cantemerle
L4_HS.Temp12.3vsDM.3	1760	-0.605813	11.7404	4.33776	0.0406737	0.125017	0	Gruaud_Larose
L4_HS.Temp12.3vsDM.3	1776	-0.521666	8.58326	1.7941	0.184458	0.357705	0	Massey_GF7
L4_HS.Temp12.3vsDM.3	1778	-0.61167	11.6879	4.53207	0.0365372	0.125017	0	Massey_GF8C
L4_HS.Temp12.3vsDM.3	1781	-0.710495	10.9032	5.11609	0.0265921	0.103836	0	YW8316_Yquem
L4_HS.Temp12.3vsDM.3	1795	0.061165	15.217	0.0281479	0.867212	0.960964	0	Henri.Martin_8130
L4_HS.Temp12.3vsDM.3	1796	0.516983	13.6761	1.76829	0.187611	0.357705	0	YW8413
L4_HS.Temp12.3vsDM.3	1833	-0.469846	8.50021	1.54101	0.218323	0.372969	0	Uvaferm_43
L4_HS.Temp12.3vsDM.3	1910	1.11895	14.6792	7.3797	0.00817989	0.0460526	1	NCYC_738.1
L4_HS.Temp12.3vsDM.3	1918	-0.191712	9.19316	0.357151	0.551887	0.646496	0	DSIR_Wine_Research__R102
L4_HS.Temp12.3vsDM.3	2013	-0.744031	9.66121	4.25065	0.0426887	0.125017	0	Blastocel_Grand_Cru
L4_HS.Temp12.3vsDM.3	2078	0.5448	16.6429	1.25995	0.26523	0.418247	0	Lalvin_CY3079
L4_HS.Temp12.3vsDM.3	2079	-1.02517	9.39686	8.41789	0.0048699	0.0363029	-1	Enoferm_T306
L4_HS.Temp12.3vsDM.3	2260	0.449378	13.3676	1.48963	0.226085	0.378346	0	Lalvin_QA23
L4_HS.Temp12.3vsDM.3	2308	0.253746	14.8535	0.370163	0.544747	0.646496	0	Brocksopp_1
L4_HS.Temp12.3vsDM.3	2776	0.0839276	14.7768	0.0495779	0.824403	0.926041	0	NT_116
L4_HS.Temp12.3vsDM.3	2851	1.02103	16.7016	3.4732	0.0663841	0.170109	0	Actiflore_Rose
L4_HS.Temp12.3vsDM.3	2852	-0.0378091	8.83308	0.00910728	0.924225	0.983497	0	Zymaflore_F15
L4_HS.Temp12.3vsDM.3	2858	0.0235378	13.2464	0.00568301	0.940108	0.983497	0	Zymaflore_VL1
L4_HS.Temp12.3vsDM.3	2861	0.543173	13.9785	1.68232	0.198579	0.361855	0	Zymaflore_X5
L4_HS.Temp12.3vsDM.3	2863	-0.49767	10.0372	1.73366	0.191939	0.357705	0	Collection_Cepage_Chardonnay
L4_HS.Temp12.3vsDM.3	2866	-0.47461	10.3161	1.92252	0.169673	0.356747	0	Collection_Cepage_Sauvignon_Blanc
L4_HS.Temp12.3vsDM.3	2867	-0.481792	13.34	3.08167	0.0832484	0.195039	0	Collection_Cepage_Syrah
L4_HS.Temp12.3vsDM.3	2874	-0.639222	9.61594	3.5052	0.0650614	0.170109	0	Fermicru_VR5
L4_HS.Temp12.3vsDM.3	2878	-1.7859	12.098	27.4275	1.43329e-06	0.000108007	-1	NT_112
L4_HS.Temp12.3vsDM.3	2880	-0.464122	13.0355	1.6096	0.208458	0.370183	0	NT_50
L4_HS.Temp12.3vsDM.3	2881	-0.796256	10.4215	7.19419	0.00898587	0.0460526	-1	Vin_2000
L4_HS.Temp12.3vsDM.3	2910	0.30188	14.0684	0.611944	0.436511	0.569834	0	Maurivin_Elegance
L4_HS.Temp12.3vsDM.3	2913	-2.73114	7.50227	0.793965	0.376134	0.531775	0	Maurivin_Sauvignon
L4_HS.Temp12.3vsDM.3	2914	1.06831	14.6977	5.64509	0.0200496	0.0822035	0	Maurivin_UOA_Maxithiol
L4_HS.Temp18.3vsDM.3	81	0.0181035	10.2637	0.00296945	0.956687	0.998931	0	X81_Brelez
L4_HS.Temp18.3vsDM.3	170	0.0541892	9.02301	0.0237979	0.877813	0.998931	0	Sep_1
L4_HS.Temp18.3vsDM.3	213	-0.612952	6.79977	1.89796	0.17239	0.521407	0	Tintara_1953
L4_HS.Temp18.3vsDM.3	228	-0.0145303	16.2074	0.00131025	0.971221	0.998931	0	Stoneyfell_1949
L4_HS.Temp18.3vsDM.3	266	-0.503408	8.02461	2.09284	0.152143	0.520438	0	X266
L4_HS.Temp18.3vsDM.3	722	0.130098	10.0121	0.208221	0.649479	0.858989	0	X722
L4_HS.Temp18.3vsDM.3	724	0.17676	9.31839	0.242304	0.62398	0.858989	0	Bright_Tokay6
L4_HS.Temp18.3vsDM.3	735	0.700017	11.6319	5.51649	0.0214652	0.220018	0	Beech_Wadenswil
L4_HS.Temp18.3vsDM.3	740	0.389168	9.67305	1.7189	0.193821	0.535547	0	Trier_25
L4_HS.Temp18.3vsDM.3	763	0.0339318	10.0969	0.0102665	0.919563	0.998931	0	X763
L4_HS.Temp18.3vsDM.3	778	0.00129583	8.9594	1.80585e-06	0.998931	0.998931	0	X778
L4_HS.Temp18.3vsDM.3	796	-0.29648	16.7048	0.409662	0.524085	0.785838	0	X796
L4_HS.Temp18.3vsDM.3	833	-0.382604	7.80541	0.973725	0.326915	0.642912	0	Penfolds_B
L4_HS.Temp18.3vsDM.3	838	-0.268014	12.6389	0.910489	0.34304	0.642912	0	X838
L4_HS.Temp18.3vsDM.3	896	0.446978	11.7273	2.3565	0.128955	0.520438	0	X896
L4_HS.Temp18.3vsDM.3	934	0.109472	10.4597	0.105391	0.746354	0.927288	0	UCD_48.41
L4_HS.Temp18.3vsDM.3	935	0.323941	7.12634	0.0322873	0.857924	0.996737	0	UCD_C.9
L4_HS.Temp18.3vsDM.3	947	-0.59823	13.1578	2.28834	0.134537	0.520438	0	Beech_729
L4_HS.Temp18.3vsDM.3	1001	-0.685135	14.3508	3.17779	0.0786788	0.460833	0	Petaluma_1
L4_HS.Temp18.3vsDM.3	1017	-0.249717	13.4601	0.529468	0.469089	0.755962	0	Petaluma_2
L4_HS.Temp18.3vsDM.3	1082	0.051425	11.7742	0.0160839	0.899429	0.998931	0	NCYC_761
L4_HS.Temp18.3vsDM.3	1427	-1.3648	7.14826	0.845884	0.360658	0.642912	0	Lalvin_WSK.27
L4_HS.Temp18.3vsDM.3	1429	-0.858369	11.6023	5.05621	0.0275502	0.251013	0	Lalvin_DV10
L4_HS.Temp18.3vsDM.3	1432	0.0242746	12.735	0.00487637	0.944513	0.998931	0	Vin_7
L4_HS.Temp18.3vsDM.3	1436	0.140174	10.3118	0.231183	0.632043	0.858989	0	Lalvin_S6U
L4_HS.Temp18.3vsDM.3	1482	1.15369	9.47121	10.9331	0.00144965	0.0594355	0	C_Todd_1
L4_HS.Temp18.3vsDM.3	1483	0.796809	15.0822	3.01582	0.0865474	0.473126	0	Lalvin_ICV_D254
L4_HS.Temp18.3vsDM.3	1485	0.759407	13.5687	2.81679	0.0975506	0.499947	0	Lalvin_RC212
L4_HS.Temp18.3vsDM.3	1486	-0.615684	13.6739	2.1433	0.147359	0.520438	0	Lalvin_BM45
L4_HS.Temp18.3vsDM.3	1487	1.02376	15.2862	4.27956	0.0421082	0.313897	0	Lalvin_Rhone_L2056
L4_HS.Temp18.3vsDM.3	1488	0.737082	15.732	2.09221	0.152323	0.520438	0	Lalvin_ICV_D47
L4_HS.Temp18.3vsDM.3	1490	-0.43344	14.6798	1.04399	0.31017	0.642912	0	Lalvin_Rhone_L2323
L4_HS.Temp18.3vsDM.3	1491	0.948321	8.08661	7.54815	0.00751349	0.124111	0	Uvaferm_BDX
L4_HS.Temp18.3vsDM.3	1493	0.145638	9.88964	0.150668	0.698994	0.881808	0	Lalvin_71B
L4_HS.Temp18.3vsDM.3	1497	-0.295917	15.177	0.529593	0.469036	0.755962	0	Lalvin_T73
L4_HS.Temp18.3vsDM.3	1502	-0.925603	8.81571	7.53387	0.00756773	0.124111	0	Fusion
L4_HS.Temp18.3vsDM.3	1503	-0.282955	13.1031	0.667878	0.416372	0.711302	0	X1503
L4_HS.Temp18.3vsDM.3	1504	-0.719033	12.7703	4.72731	0.032831	0.269214	0	X1504
L4_HS.Temp18.3vsDM.3	1505	0.380385	9.83796	1.40034	0.240391	0.597336	0	Cerebray
L4_HS.Temp18.3vsDM.3	1537	-0.490925	13.5001	1.8483	0.178041	0.521407	0	Vin_13
L4_HS.Temp18.3vsDM.3	1688	0.382206	10.3066	1.32583	0.253194	0.610644	0	Zymaflore_VL3c
L4_HS.Temp18.3vsDM.3	1706	-0.26812	15.2882	0.40375	0.527086	0.785838	0	unknown
L4_HS.Temp18.3vsDM.3	1709	0.334687	10.4872	1.23445	0.27008	0.629891	0	Wolf
L4_HS.Temp18.3vsDM.3	1712	-0.0679358	15.9785	0.0299678	0.863028	0.996737	0	YW8134
L4_HS.Temp18.3vsDM.3	1716	-0.0248242	6.80763	0.00369269	0.951705	0.998931	0	Petaluma_1A
L4_HS.Temp18.3vsDM.3	1722	-0.646175	6.9988	2.43035	0.123202	0.520438	0	CBS_7045
L4_HS.Temp18.3vsDM.3	1729	0.269641	10.1146	0.526884	0.470171	0.755962	0	YW8003
L4_HS.Temp18.3vsDM.3	1736	-0.177101	11.0863	0.314522	0.576584	0.829472	0	YW8154
L4_HS.Temp18.3vsDM.3	1742	0.271836	9.27417	0.43341	0.512387	0.785838	0	YW8205
L4_HS.Temp18.3vsDM.3	1756	-0.0010982	16.5786	6.66249e-06	0.997947	0.998931	0	Morey_St_Denis
L4_HS.Temp18.3vsDM.3	1757	0.705218	9.43894	3.35778	0.0708439	0.446861	0	Chateau_d.Yquem
L4_HS.Temp18.3vsDM.3	1758	0.599908	15.0999	1.91873	0.170089	0.521407	0	Haut.Brion_1
L4_HS.Temp18.3vsDM.3	1759	0.669384	10.2459	3.79771	0.0550502	0.376177	0	Chateau_Cantemerle
L4_HS.Temp18.3vsDM.3	1760	-0.148385	11.7404	0.262813	0.609696	0.858989	0	Gruaud_Larose
L4_HS.Temp18.3vsDM.3	1776	-0.163227	8.58326	0.181299	0.671474	0.865313	0	Massey_GF7
L4_HS.Temp18.3vsDM.3	1778	0.0273442	11.6879	0.00918244	0.923914	0.998931	0	Massey_GF8C
L4_HS.Temp18.3vsDM.3	1781	0.296385	10.9032	0.913057	0.342364	0.642912	0	YW8316_Yquem
L4_HS.Temp18.3vsDM.3	1795	-0.364187	15.217	0.991377	0.322597	0.642912	0	Henri.Martin_8130
L4_HS.Temp18.3vsDM.3	1796	-0.537168	13.6761	1.88099	0.174297	0.521407	0	YW8413
L4_HS.Temp18.3vsDM.3	1833	1.10466	8.50021	9.40114	0.00301132	0.0823094	0	Uvaferm_43
L4_HS.Temp18.3vsDM.3	1910	0.191736	14.6792	0.215196	0.644064	0.858989	0	NCYC_738.1
L4_HS.Temp18.3vsDM.3	1918	0.806337	9.19316	6.59568	0.0122044	0.142966	0	DSIR_Wine_Research__R102
L4_HS.Temp18.3vsDM.3	2013	-0.432072	9.66121	1.45965	0.230769	0.591345	0	Blastocel_Grand_Cru
L4_HS.Temp18.3vsDM.3	2078	0.481155	16.6429	0.982179	0.324837	0.642912	0	Lalvin_CY3079
L4_HS.Temp18.3vsDM.3	2079	0.00284295	9.39686	6.69216e-05	0.993495	0.998931	0	Enoferm_T306
L4_HS.Temp18.3vsDM.3	2260	-0.0855289	13.3676	0.053633	0.817486	0.985793	0	Lalvin_QA23
L4_HS.Temp18.3vsDM.3	2308	0.294983	14.8535	0.500529	0.481453	0.759214	0	Brocksopp_1
L4_HS.Temp18.3vsDM.3	2776	-0.414759	14.7768	1.2014	0.276537	0.629891	0	NT_116
L4_HS.Temp18.3vsDM.3	2851	0.456467	16.7016	0.691608	0.408325	0.711302	0	Actiflore_Rose
L4_HS.Temp18.3vsDM.3	2852	0.988837	8.83308	7.06135	0.0096139	0.13139	0	Zymaflore_F15
L4_HS.Temp18.3vsDM.3	2858	-0.475661	13.2464	2.30321	0.133297	0.520438	0	Zymaflore_VL1
L4_HS.Temp18.3vsDM.3	2861	-0.255898	13.9785	0.369635	0.545034	0.798085	0	Zymaflore_X5
L4_HS.Temp18.3vsDM.3	2863	0.347357	10.0372	0.868003	0.354488	0.642912	0	Collection_Cepage_Chardonnay
L4_HS.Temp18.3vsDM.3	2866	0.442389	10.3161	1.70254	0.195932	0.535547	0	Collection_Cepage_Sauvignon_Blanc
L4_HS.Temp18.3vsDM.3	2867	-0.256256	13.34	0.875895	0.352322	0.642912	0	Collection_Cepage_Syrah
L4_HS.Temp18.3vsDM.3	2874	0.0915384	9.61594	0.0740029	0.78634	0.962387	0	Fermicru_VR5
L4_HS.Temp18.3vsDM.3	2878	-1.27459	12.098	14.289	0.000311888	0.0255749	-1	NT_112
L4_HS.Temp18.3vsDM.3	2880	0.152845	13.0355	0.176765	0.675366	0.865313	0	NT_50
L4_HS.Temp18.3vsDM.3	2881	0.0541755	10.4215	0.0341215	0.853945	0.996737	0	Vin_2000
L4_HS.Temp18.3vsDM.3	2910	-0.394549	14.0684	1.03508	0.312228	0.642912	0	Maurivin_Elegance
L4_HS.Temp18.3vsDM.3	2913	-2.77851	7.50227	1.64732	0.203802	0.53909	0	Maurivin_Sauvignon
L4_HS.Temp18.3vsDM.3	2914	0.653741	14.6977	2.10925	0.150567	0.520438	0	Maurivin_UOA_Maxithiol
L4_Temp28.3vsDM.3	81	-0.239403	10.2637	0.46787	0.49607	0.666254	0	X81_Brelez
L4_Temp28.3vsDM.3	170	0.00257807	9.02301	4.97676e-05	0.99439	0.998433	0	Sep_1
L4_Temp28.3vsDM.3	213	-0.554483	6.79977	1.50244	0.224118	0.459442	0	Tintara_1953
L4_Temp28.3vsDM.3	228	-0.511306	16.2074	1.45836	0.230973	0.461945	0	Stoneyfell_1949
L4_Temp28.3vsDM.3	266	-0.100178	8.02461	0.0764769	0.782888	0.855957	0	X266
L4_Temp28.3vsDM.3	722	-1.11488	10.0121	13.6186	0.000421215	0.00493423	-1	X722
L4_Temp28.3vsDM.3	724	-0.885354	9.31839	5.41753	0.0226263	0.110441	0	Bright_Tokay6
L4_Temp28.3vsDM.3	735	0.732876	11.6319	5.39528	0.0228963	0.110441	0	Beech_Wadenswil
L4_Temp28.3vsDM.3	740	-0.194815	9.67305	0.386064	0.536253	0.666254	0	Trier_25
L4_Temp28.3vsDM.3	763	-0.559429	10.0969	2.50839	0.117435	0.300928	0	X763
L4_Temp28.3vsDM.3	778	-0.301957	8.9594	0.723958	0.397548	0.582124	0	X778
L4_Temp28.3vsDM.3	796	0.937804	16.7048	3.68813	0.05859	0.200182	0	X796
L4_Temp28.3vsDM.3	833	0.0406844	7.80541	0.0104566	0.918824	0.941795	0	Penfolds_B
L4_Temp28.3vsDM.3	838	0.239727	12.6389	0.658162	0.419768	0.588855	0	X838
L4_Temp28.3vsDM.3	896	0.150365	11.7273	0.238766	0.62652	0.733923	0	X896
L4_Temp28.3vsDM.3	934	-1.20024	10.4597	11.2697	0.00123788	0.0101506	-1	UCD_48.41
L4_Temp28.3vsDM.3	935	-2.41793	7.12634	1.08684	0.300804	0.518004	0	UCD_C.9
L4_Temp28.3vsDM.3	947	-0.862224	13.1578	4.30421	0.0414375	0.161804	0	Beech_729
L4_Temp28.3vsDM.3	1001	0.524068	14.3508	1.69144	0.19738	0.449588	0	Petaluma_1
L4_Temp28.3vsDM.3	1017	-0.219749	13.4601	0.370345	0.544649	0.666585	0	Petaluma_2
L4_Temp28.3vsDM.3	1082	-0.691435	11.7742	2.61302	0.110295	0.291748	0	NCYC_761
L4_Temp28.3vsDM.3	1427	-1.22506	7.14826	0.723986	0.397539	0.582124	0	Lalvin_WSK.27
L4_Temp28.3vsDM.3	1429	0.332889	11.6023	0.695913	0.406876	0.585331	0	Lalvin_DV10
L4_Temp28.3vsDM.3	1432	-0.200967	12.735	0.301091	0.584824	0.695008	0	Vin_7
L4_Temp28.3vsDM.3	1436	-0.558211	10.3118	3.28878	0.0737418	0.223956	0	Lalvin_S6U
L4_Temp28.3vsDM.3	1482	1.39375	9.47121	14.7395	0.000255301	0.00447309	1	C_Todd_1
L4_Temp28.3vsDM.3	1483	1.68082	15.0822	11.7969	0.000968366	0.00978945	1	Lalvin_ICV_D254
L4_Temp28.3vsDM.3	1485	1.82171	13.5687	14.2203	0.0003273	0.00447309	1	Lalvin_RC212
L4_Temp28.3vsDM.3	1486	-0.818466	13.6739	3.43169	0.0678776	0.214076	0	Lalvin_BM45
L4_Temp28.3vsDM.3	1487	-0.328661	15.2862	0.393171	0.53259	0.666254	0	Lalvin_Rhone_L2056
L4_Temp28.3vsDM.3	1488	-0.126928	15.732	0.055414	0.814555	0.867448	0	Lalvin_ICV_D47
L4_Temp28.3vsDM.3	1490	-0.154753	14.6798	0.120612	0.729341	0.808189	0	Lalvin_Rhone_L2323
L4_Temp28.3vsDM.3	1491	0.760053	8.08661	4.36427	0.0400809	0.161804	0	Uvaferm_BDX
L4_Temp28.3vsDM.3	1493	-0.318353	9.88964	0.647091	0.423688	0.588855	0	Lalvin_71B
L4_Temp28.3vsDM.3	1497	0.420942	15.177	0.968087	0.32831	0.538429	0	Lalvin_T73
L4_Temp28.3vsDM.3	1502	-0.413964	8.81571	1.38506	0.24295	0.466215	0	Fusion
L4_Temp28.3vsDM.3	1503	-1.21478	13.1031	11.0328	0.00138328	0.0103117	-1	X1503
L4_Temp28.3vsDM.3	1504	-0.433753	12.7703	1.56682	0.214546	0.459442	0	X1504
L4_Temp28.3vsDM.3	1505	0.0006684	9.83796	3.88134e-06	0.998433	0.998433	0	Cerebray
L4_Temp28.3vsDM.3	1537	0.617282	13.5001	2.64618	0.107979	0.291748	0	Vin_13
L4_Temp28.3vsDM.3	1688	-0.934266	10.3066	7.05182	0.00966069	0.0528118	0	Zymaflore_VL3c
L4_Temp28.3vsDM.3	1706	0.058092	15.2882	0.0171293	0.89622	0.930254	0	unknown
L4_Temp28.3vsDM.3	1709	-0.334602	10.4872	1.1052	0.296491	0.518004	0	Wolf
L4_Temp28.3vsDM.3	1712	0.0688369	15.9785	0.027717	0.868222	0.912747	0	YW8134
L4_Temp28.3vsDM.3	1716	-0.255576	6.80763	0.352893	0.554262	0.668374	0	Petaluma_1A
L4_Temp28.3vsDM.3	1722	0.099304	6.9988	0.0569537	0.812026	0.867448	0	CBS_7045
L4_Temp28.3vsDM.3	1729	0.355602	10.1146	0.826526	0.366181	0.559761	0	YW8003
L4_Temp28.3vsDM.3	1736	-0.259105	11.0863	0.606927	0.43839	0.599133	0	YW8154
L4_Temp28.3vsDM.3	1742	-0.872147	9.27417	3.97741	0.0498417	0.177696	0	YW8205
L4_Temp28.3vsDM.3	1756	-0.502333	16.5786	1.25421	0.266311	0.485278	0	Morey_St_Denis
L4_Temp28.3vsDM.3	1757	-2.25337	9.43894	29.3931	6.86222e-07	2.81351e-05	-1	Chateau_d.Yquem
L4_Temp28.3vsDM.3	1758	-1.43369	15.0999	9.68638	0.00262395	0.0179303	-1	Haut.Brion_1
L4_Temp28.3vsDM.3	1759	-2.06321	10.2459	31.5668	3.09266e-07	2.53598e-05	-1	Chateau_Cantemerle
L4_Temp28.3vsDM.3	1760	-0.316093	11.7404	1.07463	0.303222	0.518004	0	Gruaud_Larose
L4_Temp28.3vsDM.3	1776	-0.808363	8.58326	3.99386	0.0492787	0.177696	0	Massey_GF7
L4_Temp28.3vsDM.3	1778	-0.190575	11.6879	0.401288	0.528345	0.666254	0	Massey_GF8C
L4_Temp28.3vsDM.3	1781	0.152067	10.9032	0.215613	0.643744	0.743479	0	YW8316_Yquem
L4_Temp28.3vsDM.3	1795	0.387375	15.217	1.01456	0.317039	0.530556	0	Henri.Martin_8130
L4_Temp28.3vsDM.3	1796	0.482387	13.6761	1.37603	0.244478	0.466215	0	YW8413
L4_Temp28.3vsDM.3	1833	1.56333	8.50021	16.8671	0.00010089	0.00275767	1	Uvaferm_43
L4_Temp28.3vsDM.3	1910	-0.81551	14.6792	3.48148	0.065956	0.214076	0	NCYC_738.1
L4_Temp28.3vsDM.3	1918	1.13101	9.19316	11.5731	0.00107445	0.00978945	1	DSIR_Wine_Research__R102
L4_Temp28.3vsDM.3	2013	-0.786428	9.66121	4.36503	0.0400641	0.161804	0	Blastocel_Grand_Cru
L4_Temp28.3vsDM.3	2078	0.340988	16.6429	0.441175	0.508586	0.666254	0	Lalvin_CY3079
L4_Temp28.3vsDM.3	2079	-0.518921	9.39686	2.00545	0.160861	0.387958	0	Enoferm_T306
L4_Temp28.3vsDM.3	2260	0.244674	13.3676	0.395357	0.531401	0.666254	0	Lalvin_QA23
L4_Temp28.3vsDM.3	2308	0.544268	14.8535	1.5253	0.220661	0.459442	0	Brocksopp_1
L4_Temp28.3vsDM.3	2776	0.359978	14.7768	0.81947	0.368224	0.559761	0	NT_116
L4_Temp28.3vsDM.3	2851	-1.01299	16.7016	3.03151	0.0858667	0.251467	0	Actiflore_Rose
L4_Temp28.3vsDM.3	2852	1.48642	8.83308	14.5238	0.000280939	0.00447309	1	Zymaflore_F15
L4_Temp28.3vsDM.3	2858	0.487996	13.2464	2.19687	0.142467	0.354008	0	Zymaflore_VL1
L4_Temp28.3vsDM.3	2861	-0.507286	13.9785	1.31063	0.255908	0.47692	0	Zymaflore_X5
L4_Temp28.3vsDM.3	2863	-0.542649	10.0372	1.8938	0.172855	0.404975	0	Collection_Cepage_Chardonnay
L4_Temp28.3vsDM.3	2866	-1.06237	10.3161	8.72164	0.00419354	0.0264515	-1	Collection_Cepage_Sauvignon_Blanc
L4_Temp28.3vsDM.3	2867	-0.474204	13.34	2.70678	0.104093	0.291748	0	Collection_Cepage_Syrah
L4_Temp28.3vsDM.3	2874	-0.321213	9.61594	0.818099	0.368623	0.559761	0	Fermicru_VR5
L4_Temp28.3vsDM.3	2878	0.154671	12.098	0.194643	0.660345	0.75206	0	NT_112
L4_Temp28.3vsDM.3	2880	0.875667	13.0355	5.19173	0.0255322	0.116313	0	NT_50
L4_Temp28.3vsDM.3	2881	-0.829202	10.4215	7.15524	0.00916542	0.0528118	0	Vin_2000
L4_Temp28.3vsDM.3	2910	0.521602	14.0684	1.63623	0.204774	0.453823	0	Maurivin_Elegance
L4_Temp28.3vsDM.3	2913	-0.690491	7.50227	0.133734	0.715758	0.804002	0	Maurivin_Sauvignon
L4_Temp28.3vsDM.3	2914	-0.460892	14.6977	0.935769	0.336467	0.540986	0	Maurivin_UOA_Maxithiol
L4_HS.Temp28.3vsDM.3	81	-0.571436	10.2637	2.93658	0.0907107	0.17712	0	X81_Brelez
L4_HS.Temp28.3vsDM.3	170	-1.07858	9.02301	9.00702	0.00364701	0.0157397	-1	Sep_1
L4_HS.Temp28.3vsDM.3	213	-1.38817	6.79977	8.173	0.00549769	0.0214672	-1	Tintara_1953
L4_HS.Temp28.3vsDM.3	228	1.07418	16.2074	7.22889	0.00882902	0.0329082	1	Stoneyfell_1949
L4_HS.Temp28.3vsDM.3	266	-0.425787	8.02461	1.47182	0.228853	0.329227	0	X266
L4_HS.Temp28.3vsDM.3	722	-0.898602	10.0121	9.71552	0.0025874	0.0124804	-1	X722
L4_HS.Temp28.3vsDM.3	724	-0.253799	9.31839	0.495373	0.483712	0.613167	0	Bright_Tokay6
L4_HS.Temp28.3vsDM.3	735	0.0199163	11.6319	0.0044241	0.947145	0.999114	0	Beech_Wadenswil
L4_HS.Temp28.3vsDM.3	740	0.0392241	9.67305	0.0174048	0.895394	0.978964	0	Trier_25
L4_HS.Temp28.3vsDM.3	763	-1.13374	10.0969	11.1155	0.00133058	0.00727385	-1	X763
L4_HS.Temp28.3vsDM.3	778	-0.451117	8.9594	1.6395	0.204327	0.310275	0	X778
L4_HS.Temp28.3vsDM.3	796	1.76377	16.7048	14.6953	0.000260347	0.00177904	1	X796
L4_HS.Temp28.3vsDM.3	833	-0.347936	7.80541	0.777552	0.380699	0.503504	0	Penfolds_B
L4_HS.Temp28.3vsDM.3	838	0.00031311	12.6389	1.24148e-06	0.999114	0.999114	0	X838
L4_HS.Temp28.3vsDM.3	896	0.498552	11.7273	2.9364	0.09072	0.17712	0	X896
L4_HS.Temp28.3vsDM.3	934	-0.671883	10.4597	3.92737	0.0511584	0.123382	0	UCD_48.41
L4_HS.Temp28.3vsDM.3	935	2.49802	7.12634	1.9122	0.171169	0.286446	0	UCD_C.9
L4_HS.Temp28.3vsDM.3	947	-0.832619	13.1578	4.40889	0.039104	0.106884	0	Beech_729
L4_HS.Temp28.3vsDM.3	1001	-0.167788	14.3508	0.192415	0.662171	0.76476	0	Petaluma_1
L4_HS.Temp28.3vsDM.3	1017	0.18948	13.4601	0.306798	0.581294	0.690813	0	Petaluma_2
L4_HS.Temp28.3vsDM.3	1082	0.00518644	11.7742	0.000161636	0.989891	0.999114	0	NCYC_761
L4_HS.Temp28.3vsDM.3	1427	1.57632	7.14826	1.73683	0.191538	0.302041	0	Lalvin_WSK.27
L4_HS.Temp28.3vsDM.3	1429	0.0246267	11.6023	0.00422667	0.948341	0.999114	0	Lalvin_DV10
L4_HS.Temp28.3vsDM.3	1432	-0.292199	12.735	0.704855	0.403816	0.525602	0	Vin_7
L4_HS.Temp28.3vsDM.3	1436	-0.427789	10.3118	2.12743	0.148844	0.259685	0	Lalvin_S6U
L4_HS.Temp28.3vsDM.3	1482	1.49211	9.47121	18.2478	5.60282e-05	0.000459431	1	C_Todd_1
L4_HS.Temp28.3vsDM.3	1483	2.32262	15.0822	25.5469	2.94338e-06	3.44795e-05	1	Lalvin_ICV_D254
L4_HS.Temp28.3vsDM.3	1485	2.35213	13.5687	26.9479	1.80688e-06	2.96328e-05	1	Lalvin_RC212
L4_HS.Temp28.3vsDM.3	1486	-2.19575	13.6739	26.0401	2.43367e-06	3.32601e-05	-1	Lalvin_BM45
L4_HS.Temp28.3vsDM.3	1487	1.06239	15.2862	4.61063	0.0350888	0.0992165	0	Lalvin_Rhone_L2056
L4_HS.Temp28.3vsDM.3	1488	0.999696	15.732	3.85452	0.0534142	0.125142	0	Lalvin_ICV_D47
L4_HS.Temp28.3vsDM.3	1490	-0.374979	14.6798	0.781992	0.379349	0.503504	0	Lalvin_Rhone_L2323
L4_HS.Temp28.3vsDM.3	1491	0.912087	8.08661	6.9951	0.00994412	0.0354529	1	Uvaferm_BDX
L4_HS.Temp28.3vsDM.3	1493	-0.732831	9.88964	3.7068	0.0579697	0.132042	0	Lalvin_71B
L4_HS.Temp28.3vsDM.3	1497	1.02638	15.177	6.46076	0.013085	0.0429186	1	Lalvin_T73
L4_HS.Temp28.3vsDM.3	1502	-2.27422	8.81571	41.5127	9.95967e-09	8.16693e-07	-1	Fusion
L4_HS.Temp28.3vsDM.3	1503	-0.914634	13.1031	6.88375	0.0105263	0.0359647	-1	X1503
L4_HS.Temp28.3vsDM.3	1504	-0.428948	12.7703	1.69123	0.197408	0.305424	0	X1504
L4_HS.Temp28.3vsDM.3	1505	-0.597806	9.83796	3.38886	0.0695797	0.150146	0	Cerebray
L4_HS.Temp28.3vsDM.3	1537	1.30902	13.5001	13.3819	0.000468691	0.00295636	1	Vin_13
L4_HS.Temp28.3vsDM.3	1688	-0.561896	10.3066	2.81722	0.097406	0.181529	0	Zymaflore_VL3c
L4_HS.Temp28.3vsDM.3	1706	0.510684	15.2882	1.47964	0.227632	0.329227	0	unknown
L4_HS.Temp28.3vsDM.3	1709	-0.292144	10.4872	0.932368	0.337341	0.461033	0	Wolf
L4_HS.Temp28.3vsDM.3	1712	0.523695	15.9785	1.79332	0.184552	0.300354	0	YW8134
L4_HS.Temp28.3vsDM.3	1716	-0.23952	6.80763	0.322792	0.571626	0.690813	0	Petaluma_1A
L4_HS.Temp28.3vsDM.3	1722	-0.645736	6.9988	2.25173	0.137649	0.245375	0	CBS_7045
L4_HS.Temp28.3vsDM.3	1729	-0.500522	10.1146	1.77483	0.186805	0.300354	0	YW8003
L4_HS.Temp28.3vsDM.3	1736	-0.639044	11.0863	4.06176	0.0474359	0.121161	0	YW8154
L4_HS.Temp28.3vsDM.3	1742	-1.05413	9.27417	6.27429	0.0144778	0.0456607	-1	YW8205
L4_HS.Temp28.3vsDM.3	1756	0.492758	16.5786	1.3507	0.248828	0.351792	0	Morey_St_Denis
L4_HS.Temp28.3vsDM.3	1757	0.181168	9.43894	0.219484	0.640787	0.750637	0	Chateau_d.Yquem
L4_HS.Temp28.3vsDM.3	1758	0.662235	15.0999	2.33988	0.130292	0.237421	0	Haut.Brion_1
L4_HS.Temp28.3vsDM.3	1759	-0.624602	10.2459	3.28553	0.0738811	0.15534	0	Chateau_Cantemerle
L4_HS.Temp28.3vsDM.3	1760	-0.553278	11.7404	3.63029	0.0605569	0.134207	0	Gruaud_Larose
L4_HS.Temp28.3vsDM.3	1776	-2.17138	8.58326	29.5177	6.55249e-07	1.34326e-05	-1	Massey_GF7
L4_HS.Temp28.3vsDM.3	1778	-0.0709301	11.6879	0.0617362	0.804449	0.897552	0	Massey_GF8C
L4_HS.Temp28.3vsDM.3	1781	0.217286	10.9032	0.490087	0.486047	0.613167	0	YW8316_Yquem
L4_HS.Temp28.3vsDM.3	1795	0.209109	15.217	0.329663	0.56757	0.690813	0	Henri.Martin_8130
L4_HS.Temp28.3vsDM.3	1796	0.00676917	13.6761	0.000301586	0.98619	0.999114	0	YW8413
L4_HS.Temp28.3vsDM.3	1833	1.45309	8.50021	16.43	0.000121815	0.000908079	1	Uvaferm_43
L4_HS.Temp28.3vsDM.3	1910	0.714884	14.6792	3.0064	0.0870313	0.17712	0	NCYC_738.1
L4_HS.Temp28.3vsDM.3	1918	1.08245	9.19316	11.9493	0.000902374	0.00528533	1	DSIR_Wine_Research__R102
L4_HS.Temp28.3vsDM.3	2013	-2.02112	9.66121	30.3341	4.84903e-07	1.3254e-05	-1	Blastocel_Grand_Cru
L4_HS.Temp28.3vsDM.3	2078	1.00658	16.6429	4.31332	0.0412286	0.109056	0	Lalvin_CY3079
L4_HS.Temp28.3vsDM.3	2079	-1.65997	9.39686	21.9262	1.22898e-05	0.000125971	-1	Enoferm_T306
L4_HS.Temp28.3vsDM.3	2260	0.381481	13.3676	1.0732	0.303541	0.421871	0	Lalvin_QA23
L4_HS.Temp28.3vsDM.3	2308	1.28679	14.8535	9.58231	0.0027589	0.0125683	1	Brocksopp_1
L4_HS.Temp28.3vsDM.3	2776	0.876711	14.7768	5.45044	0.0222329	0.0651105	0	NT_116
L4_HS.Temp28.3vsDM.3	2851	-0.0167625	16.7016	0.000927326	0.975789	0.999114	0	Actiflore_Rose
L4_HS.Temp28.3vsDM.3	2852	1.61415	8.83308	18.7865	4.46689e-05	0.000406984	1	Zymaflore_F15
L4_HS.Temp28.3vsDM.3	2858	0.98595	13.2464	10.0646	0.00218856	0.0112164	1	Zymaflore_VL1
L4_HS.Temp28.3vsDM.3	2861	0.70408	13.9785	2.83093	0.0966097	0.181529	0	Zymaflore_X5
L4_HS.Temp28.3vsDM.3	2863	-0.0153307	10.0372	0.00168109	0.967404	0.999114	0	Collection_Cepage_Chardonnay
L4_HS.Temp28.3vsDM.3	2866	-0.0819263	10.3161	0.0582214	0.809986	0.897552	0	Collection_Cepage_Sauvignon_Blanc
L4_HS.Temp28.3vsDM.3	2867	-0.659977	13.34	5.76523	0.0188163	0.0571458	0	Collection_Cepage_Syrah
L4_HS.Temp28.3vsDM.3	2874	-0.479728	9.61594	2.00177	0.16124	0.275452	0	Fermicru_VR5
L4_HS.Temp28.3vsDM.3	2878	-0.671039	12.098	4.0127	0.0487598	0.121161	0	NT_112
L4_HS.Temp28.3vsDM.3	2880	2.13642	13.0355	34.7114	1.00684e-07	4.12803e-06	1	NT_50
L4_HS.Temp28.3vsDM.3	2881	-0.877427	10.4215	8.7808	0.00407361	0.0167018	-1	Vin_2000
L4_HS.Temp28.3vsDM.3	2910	0.214089	14.0684	0.307555	0.580829	0.690813	0	Maurivin_Elegance
L4_HS.Temp28.3vsDM.3	2913	0.659546	7.50227	0.0990213	0.753998	0.85872	0	Maurivin_Sauvignon
L4_HS.Temp28.3vsDM.3	2914	0.553521	14.6977	1.51113	0.222797	0.329227	0	Maurivin_UOA_Maxithiol
L5_DM.3vsDM.1	81	-1.42578	8.07565	7.79739	0.00647704	0.0108391	-1	X81_Brelez
L5_DM.3vsDM.1	170	-2.18367	8.89693	34.8861	7.18278e-08	1.96329e-07	-1	Sep_1
L5_DM.3vsDM.1	213	-5.2506	8.14749	140.487	1.25623e-19	1.71685e-18	-1	Tintara_1953
L5_DM.3vsDM.1	228	0.815837	21.2671	0.659723	0.418951	0.483859	0	Stoneyfell_1949
L5_DM.3vsDM.1	266	-2.90133	7.67867	47.8142	8.50249e-10	3.48602e-09	-1	X266
L5_DM.3vsDM.1	722	-3.04361	9.09898	71.3226	7.69329e-13	3.94281e-12	-1	X722
L5_DM.3vsDM.1	724	-2.87373	8.53648	33.6195	1.14321e-07	2.92948e-07	-1	Bright_Tokay6
L5_DM.3vsDM.1	735	-3.87207	12.3122	116.554	1.48694e-17	1.52412e-16	-1	Beech_Wadenswil
L5_DM.3vsDM.1	740	-2.0482	8.25846	29.5181	5.29255e-07	1.27644e-06	-1	Trier_25
L5_DM.3vsDM.1	763	-2.29981	9.6288	47.4842	9.46645e-10	3.69642e-09	-1	X763
L5_DM.3vsDM.1	778	-5.7286	10.0285	150.294	2.05759e-20	3.37444e-19	-1	X778
L5_DM.3vsDM.1	796	0.701816	17.9886	1.44716	0.232364	0.288694	0	X796
L5_DM.3vsDM.1	833	-2.75281	7.24794	46.8422	1.1676e-09	4.35197e-09	-1	Penfolds_B
L5_DM.3vsDM.1	838	-0.141679	13.148	0.17677	0.675236	0.719082	0	X838
L5_DM.3vsDM.1	896	-1.75945	9.62107	20.3848	2.04551e-05	4.5333e-05	-1	X896
L5_DM.3vsDM.1	934	-0.331824	7.84867	0.597007	0.441888	0.503262	0	UCD_48.41
L5_DM.3vsDM.1	935	-10.3654	8.48829	211.002	1.21071e-23	4.96392e-22	-1	UCD_C.9
L5_DM.3vsDM.1	947	0.277536	13.6825	0.974745	0.326332	0.382274	0	Beech_729
L5_DM.3vsDM.1	1001	0.959594	15.9735	9.48264	0.00280167	0.0052213	1	Petaluma_1
L5_DM.3vsDM.1	1017	0.818955	12.1777	7.92319	0.00607701	0.0103816	1	Petaluma_2
L5_DM.3vsDM.1	1082	-1.01005	14.4713	4.52089	0.0366136	0.0536128	0	NCYC_761
L5_DM.3vsDM.1	1427	-8.59694	8.09668	190.11	2.17548e-22	5.94631e-21	-1	Lalvin_WSK.27
L5_DM.3vsDM.1	1429	0.742128	13.2648	6.60099	0.0119565	0.0186211	1	Lalvin_DV10
L5_DM.3vsDM.1	1432	-0.46842	12.1987	0.388406	0.535322	0.58273	0	Vin_7
L5_DM.3vsDM.1	1436	-2.6307	9.60104	31.7316	2.29961e-07	5.71418e-07	-1	Lalvin_S6U
L5_DM.3vsDM.1	1482	-6.45121	9.82533	251.976	5.01156e-27	4.10948e-25	-1	C_Todd_1
L5_DM.3vsDM.1	1483	0.498649	14.5289	2.05679	0.155237	0.202055	0	Lalvin_ICV_D254
L5_DM.3vsDM.1	1485	0.581475	12.846	2.80393	0.0977484	0.131399	0	Lalvin_RC212
L5_DM.3vsDM.1	1486	0.363563	13.1871	1.88048	0.173928	0.222845	0	Lalvin_BM45
L5_DM.3vsDM.1	1487	0.966677	14.0019	7.69475	0.00682101	0.0111865	1	Lalvin_Rhone_L2056
L5_DM.3vsDM.1	1488	1.61813	14.5511	34.6933	7.70379e-08	2.03778e-07	1	Lalvin_ICV_D47
L5_DM.3vsDM.1	1490	1.04173	13.565	6.98926	0.00978225	0.0157283	1	Lalvin_Rhone_L2323
L5_DM.3vsDM.1	1491	-3.06892	6.85766	45.9631	1.55884e-09	5.55761e-09	-1	Uvaferm_BDX
L5_DM.3vsDM.1	1493	-3.88675	9.70021	104.78	1.93307e-16	1.58512e-15	-1	Lalvin_71B
L5_DM.3vsDM.1	1497	2.09265	14.557	28.8753	6.76926e-07	1.58594e-06	1	Lalvin_T73
L5_DM.3vsDM.1	1502	0.102441	14.4959	0.062407	0.803341	0.823425	0	Fusion
L5_DM.3vsDM.1	1503	-0.0900324	14.1392	0.091293	0.763286	0.792271	0	X1503
L5_DM.3vsDM.1	1504	0.440646	16.6138	1.42474	0.235981	0.288812	0	X1504
L5_DM.3vsDM.1	1505	-2.67635	15.8893	43.2715	3.82602e-09	1.20667e-08	-1	Cerebray
L5_DM.3vsDM.1	1537	0.290526	13.9691	0.41732	0.520154	0.576387	0	Vin_13
L5_DM.3vsDM.1	1688	-1.75694	8.05486	17.9022	5.89637e-05	0.000127237	-1	Zymaflore_VL3c
L5_DM.3vsDM.1	1706	1.60623	14.5021	13.8272	0.000360709	0.000721417	1	unknown
L5_DM.3vsDM.1	1709	-1.21244	8.78509	8.70775	0.00410421	0.00731619	-1	Wolf
L5_DM.3vsDM.1	1712	1.21191	15.462	3.06049	0.0849282	0.116069	0	YW8134
L5_DM.3vsDM.1	1716	-2.86437	6.5119	51.0094	3.04889e-10	1.31584e-09	-1	Petaluma_1A
L5_DM.3vsDM.1	1722	-4.3103	7.18285	90.033	6.10218e-15	4.14865e-14	-1	CBS_7045
L5_DM.3vsDM.1	1729	-4.1737	10.5815	115.411	1.89458e-17	1.72617e-16	-1	YW8003
L5_DM.3vsDM.1	1736	-0.242254	9.13184	0.378456	0.540092	0.58273	0	YW8154
L5_DM.3vsDM.1	1742	-4.07852	9.86897	90.1902	5.87259e-15	4.14865e-14	-1	YW8205
L5_DM.3vsDM.1	1756	1.54136	13.8891	16.2599	0.000120912	0.00024787	1	Morey_St_Denis
L5_DM.3vsDM.1	1757	-4.23528	8.18773	83.2164	3.33271e-14	1.95202e-13	-1	Chateau_d.Yquem
L5_DM.3vsDM.1	1758	0.946407	13.6717	8.35778	0.00488575	0.00852407	1	Haut.Brion_1
L5_DM.3vsDM.1	1759	-0.705236	6.90386	2.40569	0.12465	0.16486	0	Chateau_Cantemerle
L5_DM.3vsDM.1	1760	-0.857843	9.26155	3.46118	0.0663244	0.0921797	0	Gruaud_Larose
L5_DM.3vsDM.1	1776	-2.62258	8.39241	38.9233	1.70423e-08	5.1758e-08	-1	Massey_GF7
L5_DM.3vsDM.1	1778	-1.52308	10.1157	13.1585	0.000489901	0.000956473	-1	Massey_GF8C
L5_DM.3vsDM.1	1781	-4.16787	10.3627	79.4768	8.71853e-14	4.76613e-13	-1	YW8316_Yquem
L5_DM.3vsDM.1	1795	0.321227	16.6994	1.19101	0.278243	0.330666	0	Henri.Martin_8130
L5_DM.3vsDM.1	1796	0.362565	15.127	1.32037	0.253782	0.306032	0	YW8413
L5_DM.3vsDM.1	1833	-2.97422	7.31432	44.5437	2.49669e-09	8.18915e-09	-1	Uvaferm_43
L5_DM.3vsDM.1	1910	0.633156	13.9001	1.50134	0.224516	0.283236	0	NCYC_738.1
L5_DM.3vsDM.1	1918	-2.53329	7.51629	35.2902	6.20495e-08	1.7545e-07	-1	DSIR_Wine_Research__R102
L5_DM.3vsDM.1	2013	-0.785562	8.54957	4.33642	0.0403439	0.0580386	0	Blastocel_Grand_Cru
L5_DM.3vsDM.1	2078	1.32632	14.3835	17.5997	6.72282e-05	0.000141352	1	Lalvin_CY3079
L5_DM.3vsDM.1	2079	-1.25053	8.00793	11.3585	0.00113594	0.00216621	-1	Enoferm_T306
L5_DM.3vsDM.1	2260	0.0764417	15.1086	0.0458159	0.831029	0.841288	0	Lalvin_QA23
L5_DM.3vsDM.1	2308	1.34063	12.9025	27.2717	1.25944e-06	2.86872e-06	1	Brocksopp_1
L5_DM.3vsDM.1	2776	-0.0418824	15.2483	0.011826	0.913662	0.913662	0	NT_116
L5_DM.3vsDM.1	2851	2.25387	14.5967	45.212	1.99871e-09	6.82891e-09	1	Actiflore_Rose
L5_DM.3vsDM.1	2852	-5.60562	8.58978	155.099	1.31318e-20	2.69201e-19	-1	Zymaflore_F15
L5_DM.3vsDM.1	2858	0.243575	13.5473	0.562134	0.455494	0.511651	0	Zymaflore_VL1
L5_DM.3vsDM.1	2861	-1.19288	12.5534	9.30547	0.00305666	0.00556992	-1	Zymaflore_X5
L5_DM.3vsDM.1	2863	-4.14299	9.22507	89.7261	6.57712e-15	4.14865e-14	-1	Collection_Cepage_Chardonnay
L5_DM.3vsDM.1	2866	-1.27967	10.2015	6.58863	0.0120356	0.0186211	-1	Collection_Cepage_Sauvignon_Blanc
L5_DM.3vsDM.1	2867	0.812921	12.438	5.17059	0.0255196	0.0380473	1	Collection_Cepage_Syrah
L5_DM.3vsDM.1	2874	-3.44407	8.54821	62.7962	8.53358e-12	4.1162e-11	-1	Fermicru_VR5
L5_DM.3vsDM.1	2878	0.0990275	14.1395	0.111875	0.738852	0.776742	0	NT_112
L5_DM.3vsDM.1	2880	-0.836478	14.0328	6.51166	0.0125255	0.0190202	-1	NT_50
L5_DM.3vsDM.1	2881	-3.14562	9.37212	54.7103	9.58977e-11	4.36867e-10	-1	Vin_2000
L5_DM.3vsDM.1	2910	0.56282	15.1354	3.83049	0.0536456	0.0758437	0	Maurivin_Elegance
L5_DM.3vsDM.1	2913	-8.53708	7.95263	133.763	6.67418e-18	7.81833e-17	-1	Maurivin_Sauvignon
L5_DM.3vsDM.1	2914	1.75579	13.7731	36.0662	4.69175e-08	1.37401e-07	1	Maurivin_UOA_Maxithiol
L5_noVit.3vsDM.3	1505	7.31263	15.8893	148.916	2.64049e-20	2.16521e-18	1	Cerebray
L5_noVit.3vsDM.3	2913	2.2944	7.95263	5.73423	0.0193178	0.11089	0	Maurivin_Sauvignon
L5_noVit.3vsDM.3	2861	2.2155	12.5534	16.1133	0.000129111	0.00264678	1	Zymaflore_X5
L5_noVit.3vsDM.3	935	1.95591	8.48829	3.02027	0.0862747	0.208074	0	UCD_C.9
L5_noVit.3vsDM.3	1504	1.75067	16.6138	11.1195	0.0012724	0.0173895	1	X1504
L5_noVit.3vsDM.3	2866	1.64373	10.2015	5.59782	0.0202848	0.11089	0	Collection_Cepage_Sauvignon_Blanc
L5_noVit.3vsDM.3	1082	1.49344	14.4713	4.98665	0.0283805	0.122484	0	NCYC_761
L5_noVit.3vsDM.3	1537	1.12746	13.9691	3.12793	0.0808312	0.200853	0	Vin_13
L5_noVit.3vsDM.3	1503	1.09776	14.1392	6.74725	0.0110826	0.0757312	0	X1503
L5_noVit.3vsDM.3	2260	1.08876	15.1086	4.62058	0.0344633	0.123648	0	Lalvin_QA23
L5_noVit.3vsDM.3	1795	1.05861	16.6994	6.44482	0.0129697	0.0818091	0	Henri.Martin_8130
L5_noVit.3vsDM.3	1729	0.981783	10.5815	4.09493	0.0461872	0.135311	0	YW8003
L5_noVit.3vsDM.3	1796	0.906224	15.127	4.1184	0.0455814	0.135311	0	YW8413
L5_noVit.3vsDM.3	724	0.82407	8.53648	1.57323	0.213217	0.437094	0	Bright_Tokay6
L5_noVit.3vsDM.3	2776	0.822468	15.2483	2.27265	0.135422	0.308461	0	NT_116
L5_noVit.3vsDM.3	2863	0.587822	9.22507	1.1428	0.288121	0.49273	0	Collection_Cepage_Chardonnay
L5_noVit.3vsDM.3	1742	0.578185	9.86897	1.14134	0.288427	0.49273	0	YW8205
L5_noVit.3vsDM.3	170	0.555303	8.89693	1.22643	0.271259	0.49273	0	Sep_1
L5_noVit.3vsDM.3	2858	0.518227	13.5473	1.27204	0.262591	0.489374	0	Zymaflore_VL1
L5_noVit.3vsDM.3	1436	0.513038	9.60104	0.678133	0.412562	0.636754	0	Lalvin_S6U
L5_noVit.3vsDM.3	1502	0.455229	14.4959	0.615701	0.434856	0.636754	0	Fusion
L5_noVit.3vsDM.3	1758	0.390768	13.6717	0.724458	0.397103	0.6262	0	Haut.Brion_1
L5_noVit.3vsDM.3	1736	0.371619	9.13184	0.444806	0.506637	0.728847	0	YW8154
L5_noVit.3vsDM.3	1488	0.356523	14.5511	0.884302	0.349719	0.562294	0	Lalvin_ICV_D47
L5_noVit.3vsDM.3	81	0.352482	8.07565	0.247328	0.620262	0.843082	0	X81_Brelez
L5_noVit.3vsDM.3	796	0.295434	17.9886	0.129421	0.719936	0.894466	0	X796
L5_noVit.3vsDM.3	213	0.247597	8.14749	0.196831	0.65843	0.857005	0	Tintara_1953
L5_noVit.3vsDM.3	2078	0.222078	14.3835	0.25515	0.614793	0.843082	0	Lalvin_CY3079
L5_noVit.3vsDM.3	1427	0.21074	8.09668	0.0520014	0.820228	0.962406	0	Lalvin_WSK.27
L5_noVit.3vsDM.3	947	0.185821	13.6825	0.218773	0.641187	0.848021	0	Beech_729
L5_noVit.3vsDM.3	1017	0.108344	12.1777	0.0702401	0.791636	0.95462	0	Petaluma_2
L5_noVit.3vsDM.3	1487	0.0749834	14.0019	0.0235739	0.878342	0.98663	0	Lalvin_Rhone_L2056
L5_noVit.3vsDM.3	934	0.0353824	7.84867	0.00339145	0.953699	0.994815	0	UCD_48.41
L5_noVit.3vsDM.3	2874	0.0180029	8.54821	0.00106193	0.974081	0.994815	0	Fermicru_VR5
L5_noVit.3vsDM.3	1482	0.00517827	9.82533	0.000179635	0.989338	0.994815	0	C_Todd_1
L5_noVit.3vsDM.3	1759	-0.00424051	6.90386	4.24815e-05	0.994815	0.994815	0	Chateau_Cantemerle
L5_noVit.3vsDM.3	2079	-0.00637713	8.00793	0.000147538	0.990337	0.994815	0	Enoferm_T306
L5_noVit.3vsDM.3	2910	-0.0175189	15.1354	0.00186731	0.965635	0.994815	0	Maurivin_Elegance
L5_noVit.3vsDM.3	1001	-0.0241137	15.9735	0.00304842	0.9561	0.994815	0	Petaluma_1
L5_noVit.3vsDM.3	722	-0.055093	9.09898	0.0134255	0.908033	0.994815	0	X722
L5_noVit.3vsDM.3	1432	-0.0564945	12.1987	0.00283396	0.957708	0.994815	0	Vin_7
L5_noVit.3vsDM.3	763	-0.0755043	9.6288	0.0279733	0.867573	0.98663	0	X763
L5_noVit.3vsDM.3	1778	-0.0941337	10.1157	0.0262102	0.871776	0.98663	0	Massey_GF8C
L5_noVit.3vsDM.3	1781	-0.132543	10.3627	0.0511832	0.821566	0.962406	0	YW8316_Yquem
L5_noVit.3vsDM.3	2013	-0.203114	8.54957	0.146099	0.703256	0.887184	0	Blastocel_Grand_Cru
L5_noVit.3vsDM.3	1709	-0.229269	8.78509	0.159502	0.690628	0.884867	0	Wolf
L5_noVit.3vsDM.3	1493	-0.235546	9.70021	0.237659	0.62717	0.843082	0	Lalvin_71B
L5_noVit.3vsDM.3	740	-0.297645	8.25846	0.332187	0.565913	0.800084	0	Trier_25
L5_noVit.3vsDM.3	228	-0.392887	21.2671	0.0774505	0.781466	0.95462	0	Stoneyfell_1949
L5_noVit.3vsDM.3	1716	-0.435492	6.5119	0.615851	0.434798	0.636754	0	Petaluma_1A
L5_noVit.3vsDM.3	1776	-0.452348	8.39241	0.637207	0.426972	0.636754	0	Massey_GF7
L5_noVit.3vsDM.3	1490	-0.536602	13.565	0.94559	0.333636	0.547163	0	Lalvin_Rhone_L2323
L5_noVit.3vsDM.3	1756	-0.557326	13.8891	1.11026	0.295044	0.493748	0	Morey_St_Denis
L5_noVit.3vsDM.3	1833	-0.64586	7.31432	1.14296	0.288087	0.49273	0	Uvaferm_43
L5_noVit.3vsDM.3	2308	-0.690101	12.9025	3.73048	0.0567962	0.160596	0	Brocksopp_1
L5_noVit.3vsDM.3	1757	-0.704196	8.18773	1.37691	0.24394	0.465189	0	Chateau_d.Yquem
L5_noVit.3vsDM.3	2881	-0.720455	9.37212	1.65438	0.201893	0.424493	0	Vin_2000
L5_noVit.3vsDM.3	735	-0.755112	12.3122	2.77114	0.0996995	0.233582	0	Beech_Wadenswil
L5_noVit.3vsDM.3	1486	-0.758935	13.1871	4.0943	0.0462037	0.135311	0	Lalvin_BM45
L5_noVit.3vsDM.3	1760	-0.775621	9.26155	1.42414	0.236083	0.460923	0	Gruaud_Larose
L5_noVit.3vsDM.3	1688	-0.776002	8.05486	1.8183	0.181136	0.390873	0	Zymaflore_VL3c
L5_noVit.3vsDM.3	1722	-0.891646	7.18285	2.11044	0.150019	0.332474	0	CBS_7045
L5_noVit.3vsDM.3	838	-0.979224	13.148	4.20196	0.0434926	0.135311	0	X838
L5_noVit.3vsDM.3	896	-1.03134	9.62107	3.66586	0.0589381	0.161098	0	X896
L5_noVit.3vsDM.3	833	-1.03458	7.24794	3.49584	0.0650029	0.166794	0	Penfolds_B
L5_noVit.3vsDM.3	2851	-1.04359	14.5967	5.28281	0.0240183	0.120034	0	Actiflore_Rose
L5_noVit.3vsDM.3	778	-1.056	10.0285	3.49352	0.0650903	0.166794	0	X778
L5_noVit.3vsDM.3	1485	-1.12158	12.846	5.21714	0.0248851	0.120034	0	Lalvin_RC212
L5_noVit.3vsDM.3	2878	-1.13629	14.1395	7.31721	0.00826594	0.0616188	0	NT_112
L5_noVit.3vsDM.3	1712	-1.1854	15.462	1.49567	0.225746	0.451492	0	YW8134
L5_noVit.3vsDM.3	1497	-1.18613	14.557	4.98933	0.0281583	0.122484	0	Lalvin_T73
L5_noVit.3vsDM.3	1918	-1.25073	7.51629	4.5321	0.0361896	0.123648	0	DSIR_Wine_Research__R102
L5_noVit.3vsDM.3	1429	-1.26507	13.2648	9.61497	0.00262628	0.0269194	-1	Lalvin_DV10
L5_noVit.3vsDM.3	2852	-1.29678	8.58978	4.88365	0.0298961	0.122574	0	Zymaflore_F15
L5_noVit.3vsDM.3	1706	-1.29722	14.5021	4.69503	0.0330819	0.123648	0	unknown
L5_noVit.3vsDM.3	1483	-1.44751	14.5289	8.61817	0.00429098	0.037663	-1	Lalvin_ICV_D254
L5_noVit.3vsDM.3	1910	-1.57125	13.9001	4.60117	0.0353733	0.123648	0	NCYC_738.1
L5_noVit.3vsDM.3	2880	-1.81594	14.0328	15.2984	0.000185413	0.00304078	-1	NT_50
L5_noVit.3vsDM.3	2914	-1.8729	13.7731	21.3612	1.36015e-05	0.000557663	-1	Maurivin_UOA_Maxithiol
L5_noVit.3vsDM.3	1491	-1.88374	6.85766	8.48154	0.00459305	0.037663	-1	Uvaferm_BDX
L5_noVit.3vsDM.3	266	-1.88724	7.67867	10.2989	0.00188481	0.0220792	-1	X266
L5_noVit.3vsDM.3	2867	-2.16146	12.438	18.0763	5.46891e-05	0.00149483	-1	Collection_Cepage_Syrah
L5_noBiot.3vsDM.3	81	2.3153	8.07565	10.464	0.00174145	0.0118999	1	X81_Brelez
L5_noBiot.3vsDM.3	170	0.0784362	8.89693	0.0240596	0.877105	0.93406	0	Sep_1
L5_noBiot.3vsDM.3	213	0.659696	8.14749	1.35756	0.247255	0.397548	0	Tintara_1953
L5_noBiot.3vsDM.3	228	3.593	21.2671	6.1025	0.0155193	0.0471327	1	Stoneyfell_1949
L5_noBiot.3vsDM.3	266	0.809266	7.67867	2.06159	0.154762	0.302155	0	X266
L5_noBiot.3vsDM.3	722	-0.321936	9.09898	0.452858	0.502826	0.688154	0	X722
L5_noBiot.3vsDM.3	724	2.67023	8.53648	16.1322	0.000128037	0.00173454	1	Bright_Tokay6
L5_noBiot.3vsDM.3	735	1.78709	12.3122	15.3691	0.00017964	0.00184131	1	Beech_Wadenswil
L5_noBiot.3vsDM.3	740	-0.348129	8.25846	0.451369	0.503527	0.688154	0	Trier_25
L5_noBiot.3vsDM.3	763	-1.02061	9.6288	5.01218	0.0278104	0.0760151	0	X763
L5_noBiot.3vsDM.3	778	-0.768632	10.0285	1.75398	0.188965	0.339572	0	X778
L5_noBiot.3vsDM.3	796	3.40277	17.9886	16.2652	0.000120721	0.00173454	1	X796
L5_noBiot.3vsDM.3	833	-0.252029	7.24794	0.210251	0.647753	0.769794	0	Penfolds_B
L5_noBiot.3vsDM.3	838	0.165884	13.148	0.1211	0.728715	0.853637	0	X838
L5_noBiot.3vsDM.3	896	0.640289	9.62107	1.42614	0.235753	0.386635	0	X896
L5_noBiot.3vsDM.3	934	0.295532	7.84867	0.233264	0.630369	0.769794	0	UCD_48.41
L5_noBiot.3vsDM.3	935	0.853495	8.48829	0.408781	0.524509	0.705078	0	UCD_C.9
L5_noBiot.3vsDM.3	947	0.355523	13.6825	0.800397	0.373528	0.546952	0	Beech_729
L5_noBiot.3vsDM.3	1001	0.880013	15.9735	4.04439	0.0475215	0.121774	0	Petaluma_1
L5_noBiot.3vsDM.3	1017	0.086099	12.1777	0.0443532	0.833707	0.920735	0	Petaluma_2
L5_noBiot.3vsDM.3	1082	0.359507	14.4713	0.29195	0.590497	0.744935	0	NCYC_761
L5_noBiot.3vsDM.3	1427	-1.84129	8.09668	1.70349	0.195764	0.341546	0	Lalvin_WSK.27
L5_noBiot.3vsDM.3	1429	0.336454	13.2648	0.685175	0.410153	0.590045	0	Lalvin_DV10
L5_noBiot.3vsDM.3	1432	3.23955	12.1987	8.90972	0.00399585	0.0182033	1	Vin_7
L5_noBiot.3vsDM.3	1436	-0.0511083	9.60104	0.00661383	0.935377	0.958761	0	Lalvin_S6U
L5_noBiot.3vsDM.3	1482	-1.07256	9.82533	4.33649	0.0403422	0.106712	0	C_Todd_1
L5_noBiot.3vsDM.3	1483	-1.1753	14.5289	5.70158	0.0191901	0.0542617	0	Lalvin_ICV_D254
L5_noBiot.3vsDM.3	1485	-1.4301	12.846	8.44788	0.0046708	0.0191503	-1	Lalvin_RC212
L5_noBiot.3vsDM.3	1486	-1.71428	13.1871	20.6262	1.84848e-05	0.000378938	-1	Lalvin_BM45
L5_noBiot.3vsDM.3	1487	1.52867	14.0019	9.68659	0.00253613	0.0134277	1	Lalvin_Rhone_L2056
[truncated: 2,430 more rows]
